# Supplementary material for: Cu-Catalyzed aromatic C–H imidation with N-fluorobenzenesulfonimide: mechanistic details and predictive models
Source: PubMed Central journal article supplement (PMC5354063; doi:10.1039/c6sc04145k), 2016-10-19
Supplement: SC-008-C6SC04145K-s001.pdf [file SC-008-C6SC04145K-s001.pdf]

Supporting Information

---

**Cu-catalyzed Aromatic C-H Imidation with N-Fluorobenzenesulfonimide:  
Mechanistic Details and Predictive Models**

Brandon E. Haines<sup>†</sup>, Takahiro Kawakami<sup>§</sup>, Keiko Kuwata,<sup>§</sup> Kei Murakami<sup>§</sup>,  
Kenichiro Itami<sup>\*§,||</sup>, and Djamaladdin G. Musaev<sup>\*†</sup>

<sup>†</sup> Cherry L. Emerson Center for Scientific Computation, Emory University, 1515 Dickey  
Drive, Atlanta, Georgia 30322, United States

<sup>§</sup> Institute of Transformative Bio-Molecules (WPI-ITbM) and Graduate School of Science and

<sup>||</sup> JST-ERATO, Itami Molecular Nanocarbon Project, Nagoya University, Chikusa, Nagoya  
464-8602, Japan

E-mail: dmusaev@emory.edu, itami@chem.nagoya-u.ac.jp

---

**Table of Contents**

|                                                                                    |     |
|------------------------------------------------------------------------------------|-----|
| 1. Cu <sup>I</sup> Br oxidation by NFSI                                            | S2  |
| 2. Details of the Br/F exchange process                                            | S3  |
| 3. Bimetallic Oxidation of LCu <sup>I</sup> X (where X = F, Br, Cl, and I) by NFSI | S6  |
| 4. Conformational Analysis of the Oxidation of <b>D3-N-3F</b>                      | S8  |
| 5. Analysis of electronic states along the catalytic cycle                         | S9  |
| 6. Energy Scan for Deprotonation Step                                              | S10 |
| 7. Isotope effect calculation                                                      | S10 |
| 8. Validation of FTIR for Reaction Analysis                                        | S11 |
| 9. Sample FTIR Spectra of Reaction Profile                                         | S13 |
| 10. Independent Intermolecular KIE Experiments                                     | S14 |
| 11. Characterization Data, <sup>1</sup> H and <sup>13</sup> C NMR Spectra          | S16 |
| 12. Energies and Cartesian Coordinates                                             | S19 |

## 1. LCu<sup>I</sup>Br oxidation by NFSI

Association of NFSI and the catalyst precursor **1-Br** initiates the generation of the active catalyst through N-coordination (**2-N-Br**) or F-coordination (**2-Br**) of NFSI to the Cu atom (Figure S1). In the two examined oxidation pathways, oxidative insertion (**TS-N-F-Br'**) and S<sub>N</sub>2-type displacement (**TS-F-Br'**), the closed shell singlet determinants were found to be unstable using the G09 keyword *stable=opt*. Subsequent re-optimization of the TS structure using unrestricted DFT leads to lower energy TS structures (**TS-N-F-Br** and **TS-F-Br**) with significant diradical character. The lowest energy pathway proceeds through the S<sub>N</sub>2-type TS with diradical character, which is 6.5 kcal/mol lower than the oxidative insertion TS (**TS-N-F-Br**) and 2.3 kcal/mol lower than the closed-shell singlet TS (**TS-F-Br'**).

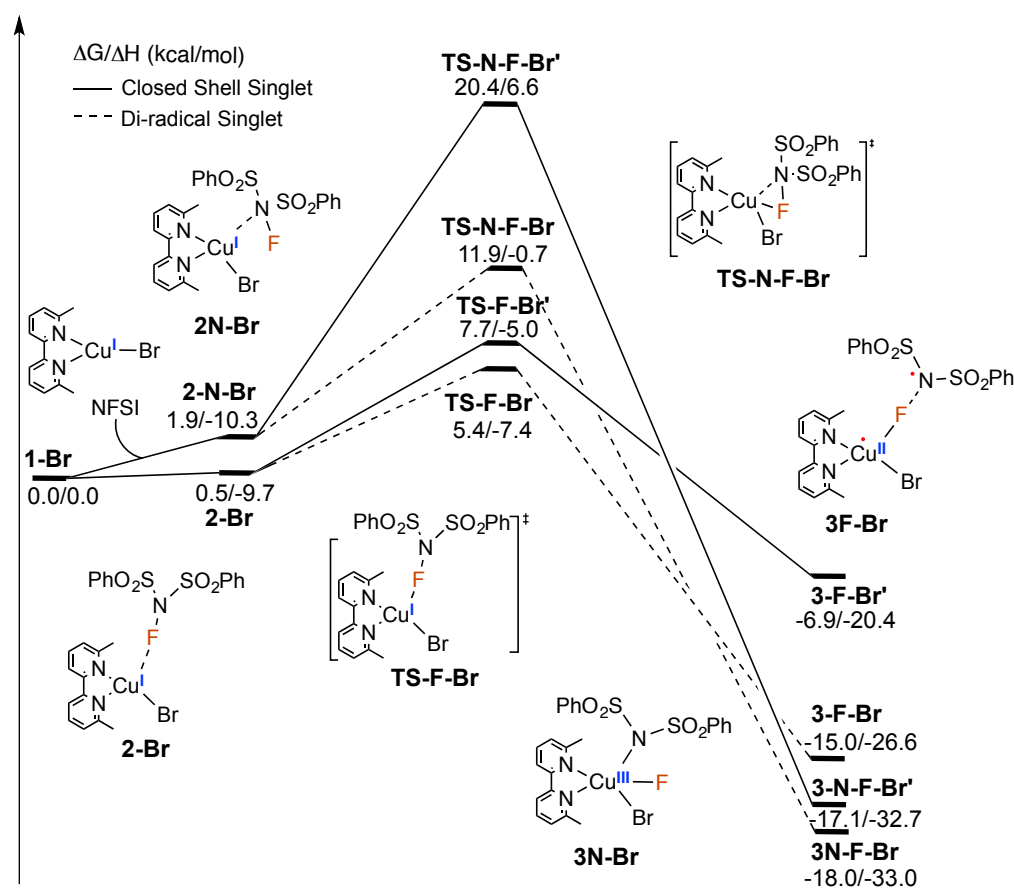

**Figure S1.** Complete free energy surface for LCu<sup>I</sup>Br oxidation by NFSI.

On the restricted DFT singlet surface, oxidative insertion of Cu into the N–F bond (**TS-N-F-Br'**) proceeds through a symmetric 3-center TS corresponding to a formal oxidative addition (OA) process. In comparison, on the unrestricted DFT singlet surface, **TS-N-F-Br** is asymmetric indicating concerted but asynchronous reactivity for this mode of N–F bond cleavage.<sup>1</sup> (Figure S2) The Cu–N bond is nearly formed (2.15 Å) and the N–F bond is barely broken (1.71 Å) while the Cu–F bond is quite long (2.41 Å). Likewise, on the restricted DFT

singlet surface, S<sub>N</sub>2-type TS (**TS-F-Br'**) corresponds to a two-electron oxidation of Cu by a transferring "F<sup>+</sup>", whereby the ligand is partially oxidized. This TS structure is late on the N-F bond breaking coordinate, indicating the relative instability of the product complex **3-F-Br'**. Stabilization of the TS and product by the mixed-spin states is consistent with the propensity of the Cu catalyst to favor one-electron oxidation processes.

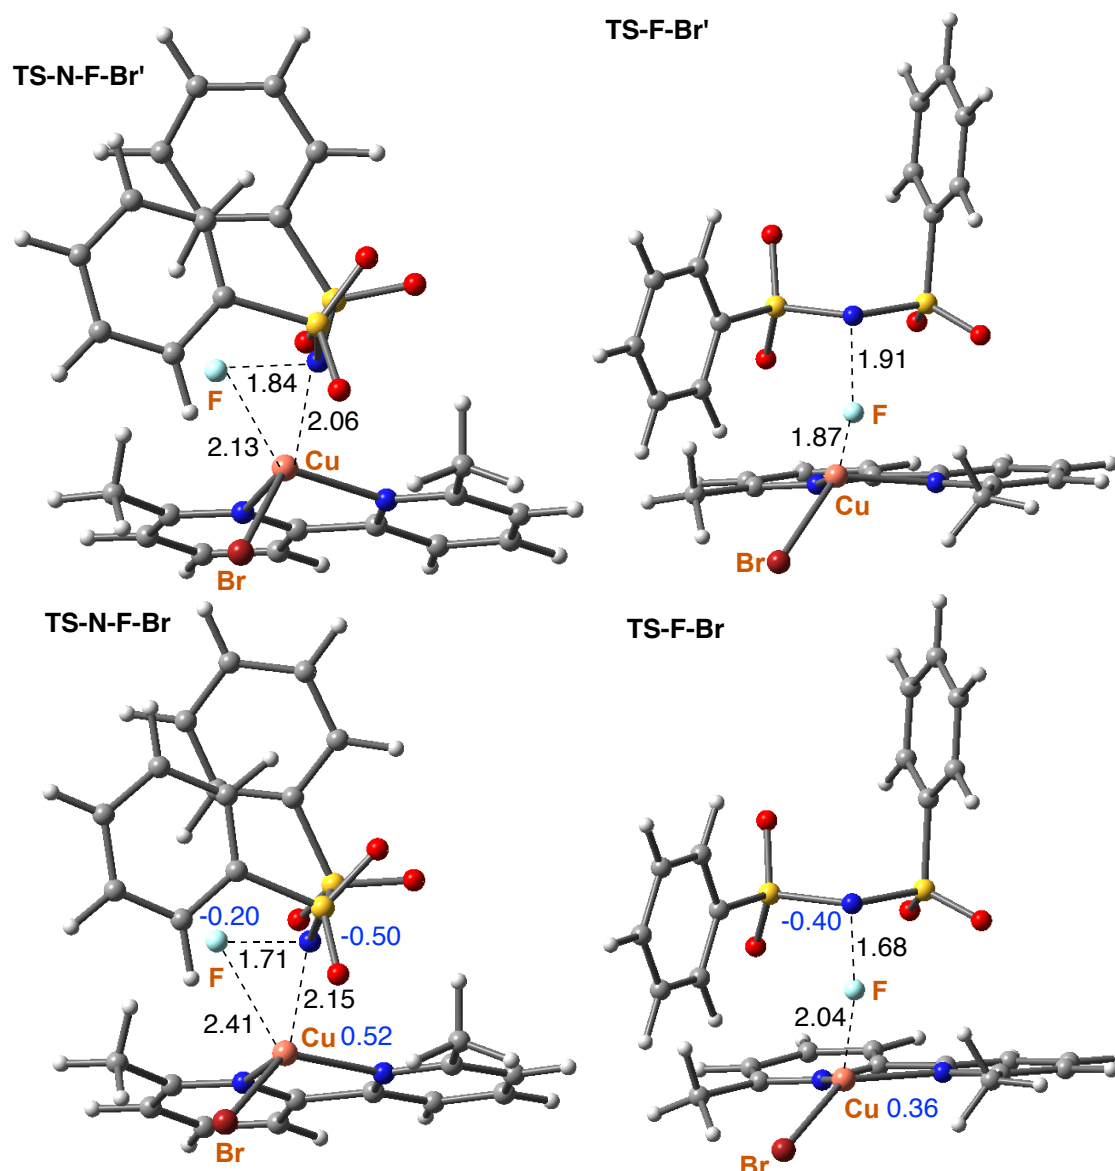

**Figure S2.** Structures of the transition states for Cu oxidation by NFSI with different electronic states.

1) Marell, D.J.; *et al. J. Org. Chem.* **2015**, *80*, 11744-11754.

## 2. Details of the Br/F exchange process

After the first oxidation, dinuclear Cu<sup>II</sup>-Cu<sup>II</sup> complex **D1-N-F-2Br** and mono-nuclear complexes **6-N-F** and **7-2Br** are in equilibrium. We show that upon reaction with two molecules of NFSI, either side of the equilibrium will produce the dinuclear Cu<sup>II</sup>-Cu<sup>II</sup>

complex with bridging fluoride ligands **D3-N-3F** and two molecules of NBrSI (Figure 5). For computational simplicity, we calculated the entire Br/F exchange process starting from the mono-nuclear complex **7-2Br** (Figure S3) and only calculate selected structures starting from the di-nuclear Cu<sup>II</sup>-Cu<sup>II</sup> complex **D1-N-F-2Br**.

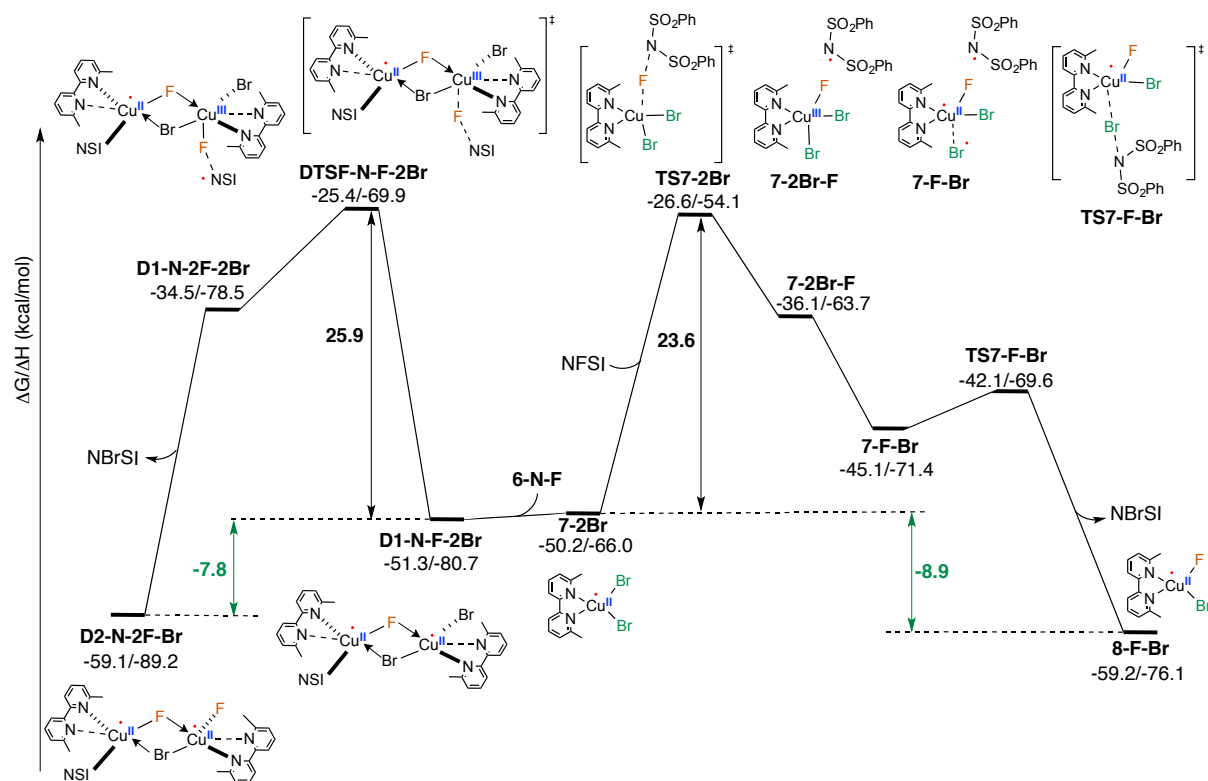

**Figure S3.** Free energy surface for the first Br/F exchange reaction for the mono-nuclear Cu complex **7-2Br** (right) and the di-nuclear Cu complex **D1-N-F-2Br** (left). Energies are calculated relative to 2 **1-Br** + NFSI.

The calculated barrier for one-electron oxidation of **7-2Br** by NFSI is  $\Delta G^\ddagger = 23.6$  kcal/mol indicating that this step is reasonable under the reaction conditions. In the anti-ferromagnetically coupled TS (**TS7-2Br**), the incoming F atom begins to displace one of the Br ligands. This process generates the reactive imidyl radical species: **7-2Br** + NFSI  $\rightarrow$  LCu<sup>III</sup>FBr<sub>2</sub> (**7-2Br-F**) +  $\cdot$ NSI, where NSI = N(SO<sub>2</sub>Ph)<sub>2</sub>, and is endergonic by  $\Delta G = 14.1$  kcal/mol. However, the Cu<sup>III</sup> intermediate **7-2Br-F** is unstable toward dissociation of bromine radical that reduces the Cu<sup>III</sup> center to Cu<sup>II</sup>. The resulting LCu<sup>II</sup>BrF complex (**7-F-Br**) contains both Br and imidyl radicals, and its formation is exergonic from **7-2Br-F** by  $\Delta G = 9.0$  kcal/mol. At this stage, it is reasonable to expect that a small amount of the imidyl radical could dissociate and react with arene, but we expect that its majority will react quickly with the bromine radical to form NBrSI. Indeed, imidyl-bromine radical combination to form a new N-Br bond occurs a small barrier of  $\Delta G^\ddagger = 3.0$  kcal/mol (**TS7-F-Br**) and falls to a stable N-Br bond and LCu<sup>II</sup>BrF (**8-F-Br**). This step completes the first Br/F exchange process

( $\text{LCuBr}_2 + \text{NFSI} \rightarrow \text{LCuBrF} + \text{NBrSI}$ ), which is exergonic by  $\Delta G = -8.9$  kcal/mol (Figure S3). The calculated barrier for one-electron oxidation of **D1-N-F-2Br** by NFSI is  $\Delta G^\ddagger = 25.9$  kcal/mol, and the overall Br/F exchange is exergonic by  $\Delta G = -7.8$  kcal/mol. Overall, the energies for the mono-nuclear and di-nuclear pathways are close in energy and either pathway can lead to occurrence of Br/F exchange.

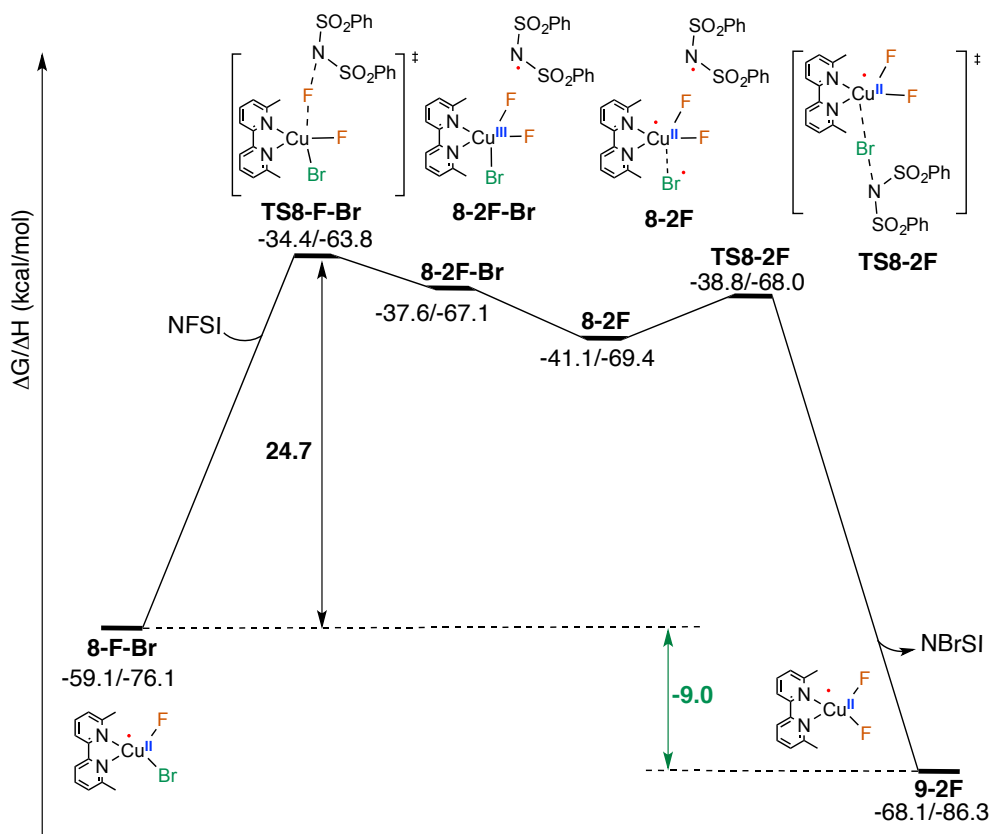

**Figure S4.** Free energy surface for the second F/Br exchange reaction for the mono-nuclear Cu complex **8-F-Br**. Energies are calculated relative to  $2 \text{ 1-Br} + \text{NFSI}$ .

The Br/F exchange process can occur a second time when **8-F-Br** reacts with NFSI. For this case, we only examine the energies of the mono-nuclear pathway and assume that the di-nuclear pathway is similar. (Figure S4) The one-electron oxidation of **8-F-Br** by NFSI occurs through a slightly higher barrier (**TS8-F-Br**) than the first exchange process ( $\Delta G^\ddagger = 24.7$  kcal/mol). The formation of  $\text{Cu}^{\text{III}}$  complex **8-F-2Br** is endergonic by  $\Delta G = 21.5$  kcal/mol. Once again, the  $\text{Cu}^{\text{III}}$  intermediate **8-2F-Br** is unstable toward dissociation of bromine radical that reduces the  $\text{Cu}^{\text{III}}$  center to  $\text{Cu}^{\text{II}}$ . The resulting  $\text{LCu}^{\text{II}}\text{F}_2$  complex (**8-2F**) again contains both Br and imidyl radicals, and its formation is exergonic from **8-2F-Br** by  $\Delta G = 3.5$  kcal/mol. Then, imidyl-bromine radical combination occurs through a small barrier of  $\Delta G^\ddagger = 2.3$  kcal/mol (**TS7-F-Br**) and produces a second molecule of NBrSI and  $\text{LCu}^{\text{II}}\text{F}_2$  (**9-2F**). Overall, the second halogen exchange process,  $\text{LCuBrF} + \text{NFSI} \rightarrow \text{LCuF}_2 + \text{NBrSI}$ , is favorable by



described in the text. For X = Cl, **5-N-F-Cl** is higher in energy than **4-F-Cl** by 2.2 kcal/mol indicating that the imidyl radical could react with arene to generate product at this stage, but accessibility to **5-N-F-Cl** will eventually lead to the bimetallic oxidation process. For X = F, **5-N-F-F** and **4-F-F** are the same energy, so both complexes are readily accessible. However, the bimetallic oxidation process might be limited by the extent of radical character on the fluoride ligands in **5-N-F-F** (Figure S6). As the radical character of X and the Cu–X distance increase, **5-N-F-X** will be more susceptible to the bimetallic oxidation process. The calculated trend in radical character of X is I > Br > Cl > F based on the Mulliken spin analysis. The Cu–X distance also follows the same trend increasing by I (3.49 Å) > Br (2.92 Å) > Cl (2.54 Å) > F (1.84 Å).

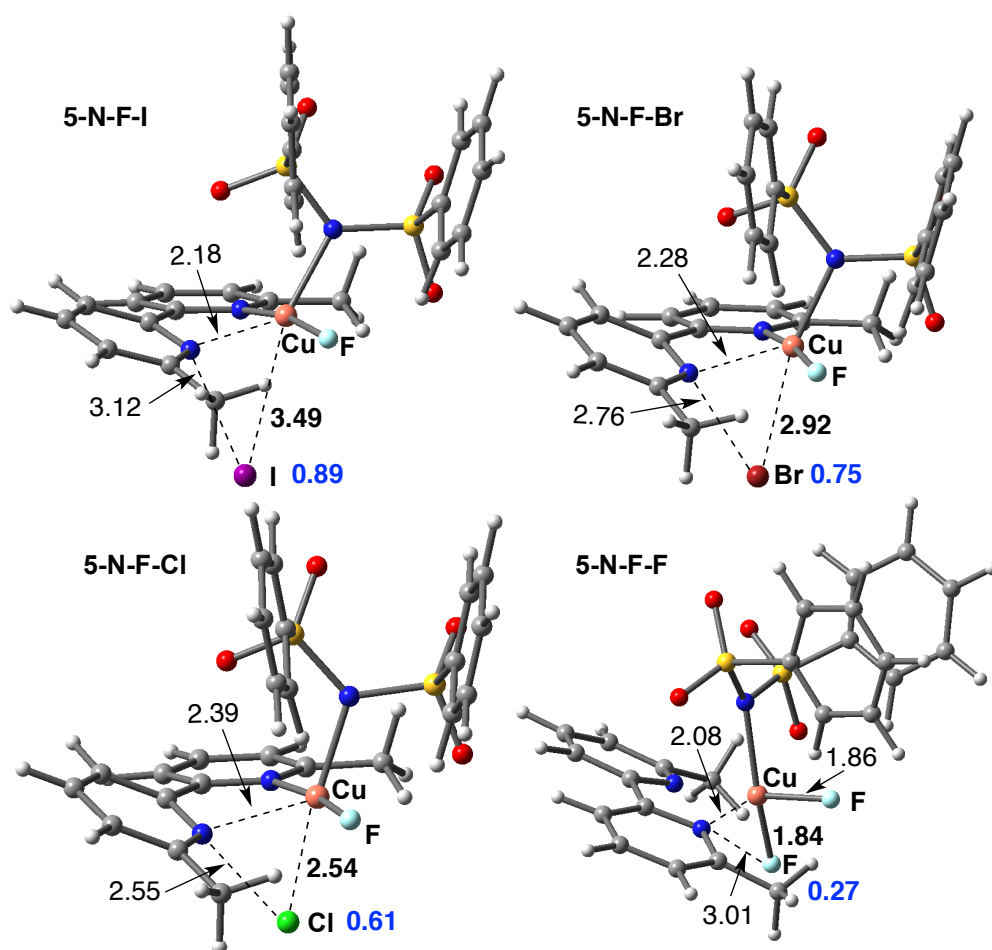

**Figure S6.** DFT-optimized structures of the Cu<sup>II</sup>--X radical intermediates, **5-N-F-X**, where X = F, Cl, Br, I. Distances in Å are shown in black and Mulliken spins densities are shown in blue.

However, in all cases, the oxidation of a second molecule of **1-X** (LCu<sup>I</sup>X) is highly exergonic (Figure S5). This indicates that bimetallic oxidation as described in the text will occur regardless of the identity of X, which will then lead to X/F exchange with NFSI and generation of a common active catalyst, **D3-N-3F**. We also investigated the possibility of

molecular bromine formation through radical combination of two Br radicals from two molecules of **5-N-F-Br** ( $2 \text{ 5-N-F-Br} \rightarrow 2 \text{ 6-N-F} + \text{Br}_2$ ). While we find that this reaction also highly favorable ( $\Delta G = -20.0 \text{ kcal/mol}$ ), it is not as exergonic as the bimetallic oxidation reaction of **5-N-F-Br** + **1-Br**  $\rightarrow$  **6-N-F** + **7-2Br** ( $\Delta G = -29.7 \text{ kcal/mol}$ ). Therefore, we expect that the bimetallic oxidation process is more likely to occur.

#### 4. Conformational Analysis of the Oxidation of D3-N-3F

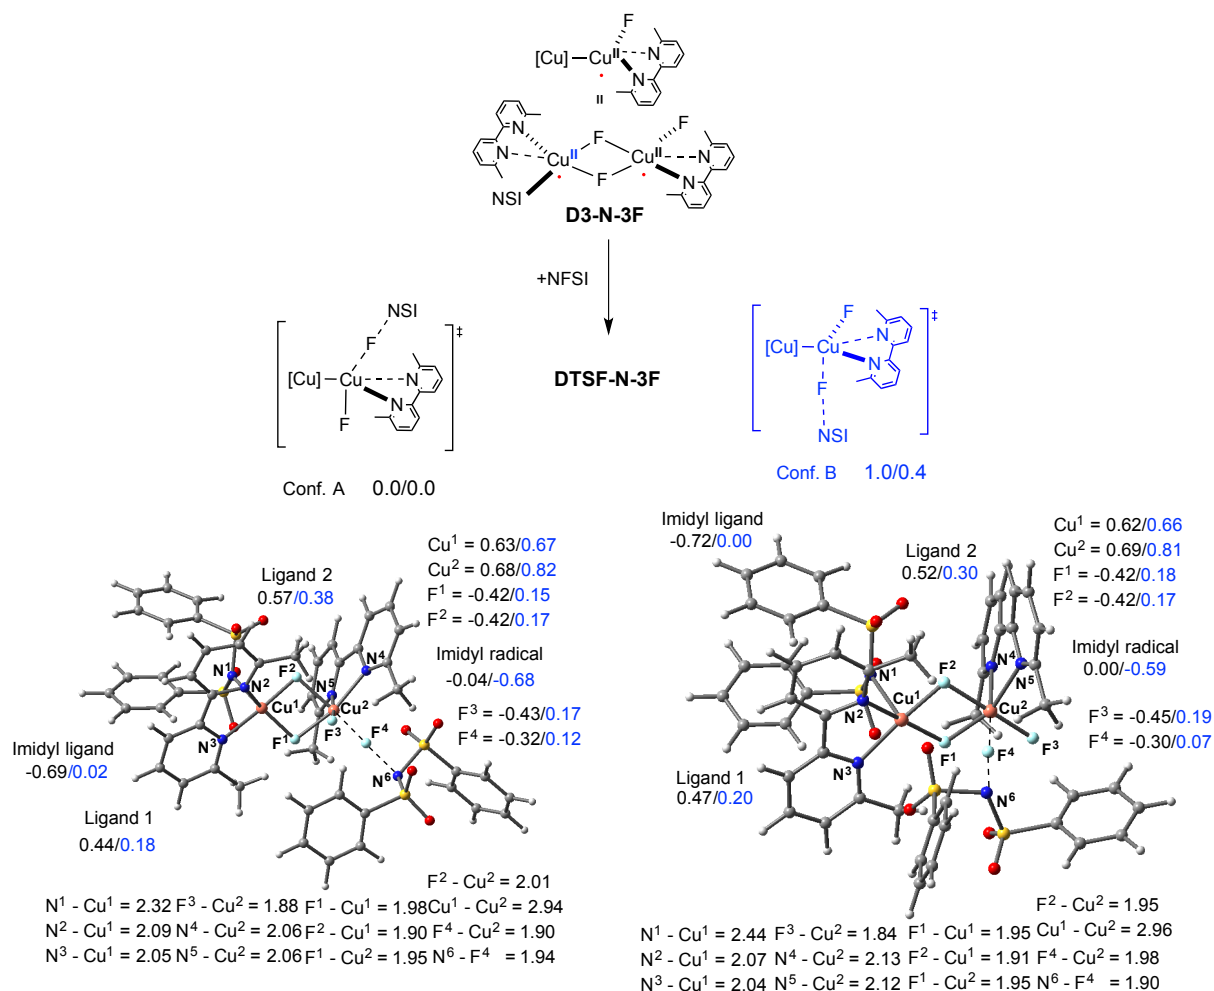

**Figure S7.**

Two conformational isomers were located for **DTSF-N-3F** as shown in Figure S7. The isomers are close in energy, but Conf. A is lower by 1.0 kcal/mol relative to Conf. B. The isomers differ in the way that NFSI approaches the  $\text{Cu}^{\text{II}}$  center: In Conf. A, the NFSI approaches along the basal plane and in Conf. B, NFSI approaches from below the basal plane. Because it is lower in energy, we discuss Conf. A in the text.



## 5. Analysis of electronic states along the catalytic cycle

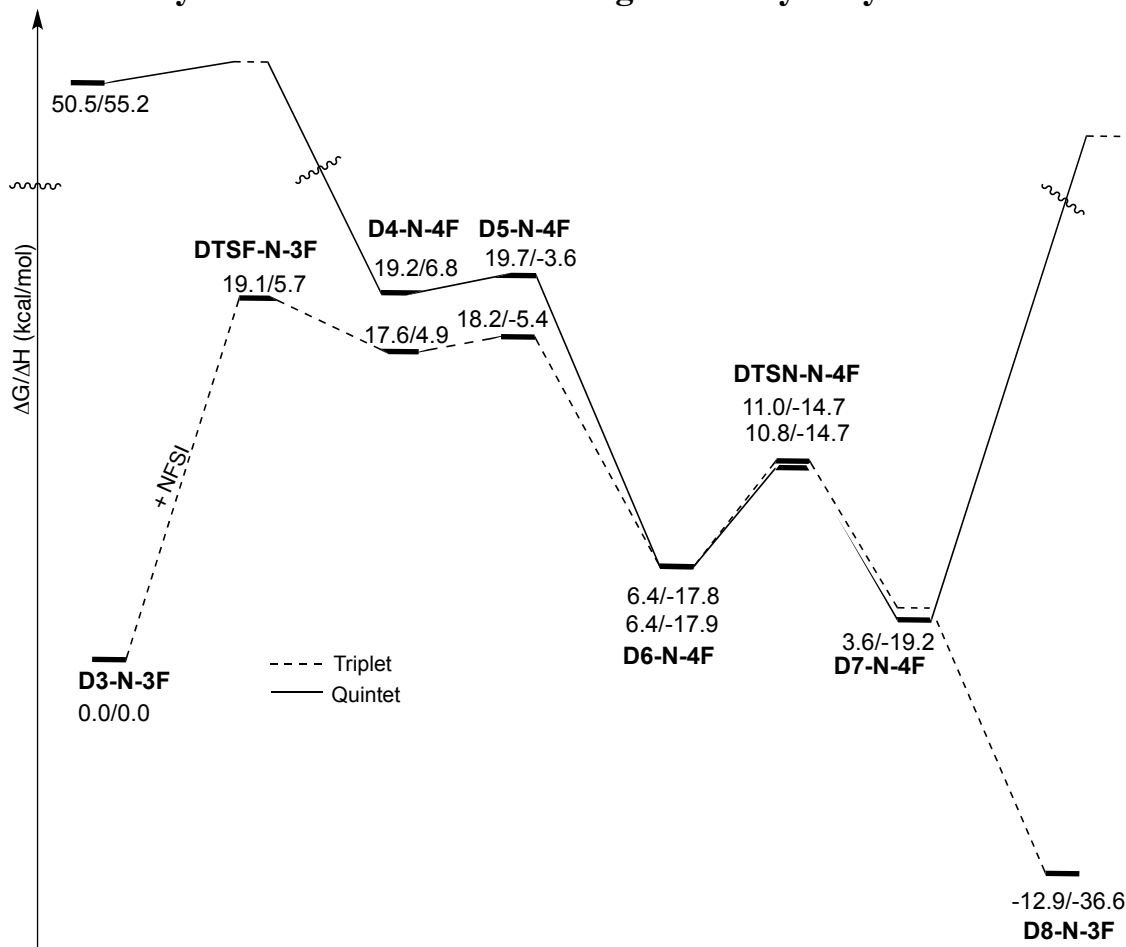

**Figure S8.** Analysis of the triplet and quintet electronic states during the catalytic cycle.

Along the catalytic cycle the anti-ferromagnetically-coupled triplet state and ferromagnetically-coupled quintet states are close in energy (Figure S8). For the reactive imidyl radical, **D4-N-3F**, the anti-ferromagnetic coupling is between the imidyl radical and the dinuclear Cu fragment and the analogous structure on the quintet surface is higher in energy by  $\Delta G = 1.6$  kcal/mol. In the C–N bond formation process, the electronic states of **D6-N-4F** and **TSCN-N-4F** are energetically indistinguishable. However, triplet state calculations for **D7-N-F** converge to the much more stable **D8-N-3F** complex, which corresponds with SET from the aryl radical to the dinuclear Cu complex. For the remainder of the catalytic cycle (not shown) the quintet state will be higher in energy than the triplet state because the spin separation in the quintet state will have to take place on the dinuclear Cu complex. This is unfavorable by  $\Delta G = 50.5$  kcal/mol in complex **D3-N-3F**.

## 6. Energy Scan for Deprotonation Step

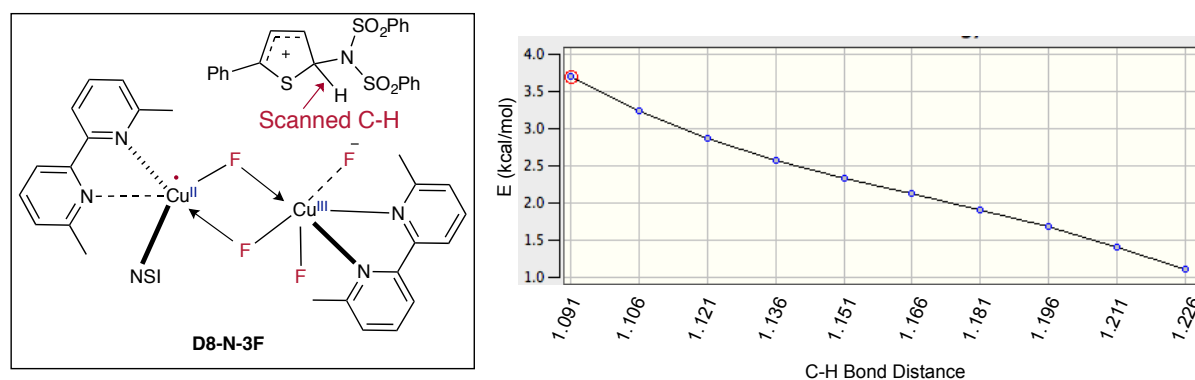

**Figure S9.** Energy scan of the C-H bond breaking coordinate from **D8-N-3F** for deprotonation and rearomatization of the substrate.

Because **D8-N-3F** could not be located without constraints, it indicates that the subsequent deprotonation and rearomatization step is barrierless. To investigate this further we performed an energy scan of the C-H bond breaking coordinate (Figure S9). Indeed, the process of breaking the C-H bond to form the product is downhill in energy along the coordinate. Additionally, all attempts to locate a TS resulted in convergence to the product complex **D9-N-3F**.

## 7. Isotope effect calculation

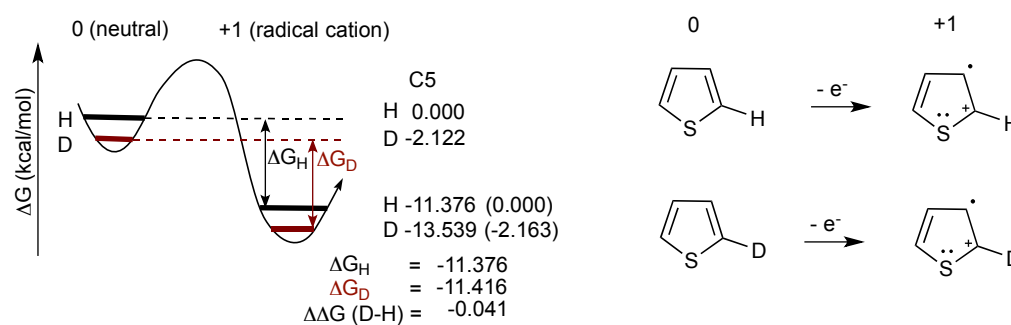

**Figure S10.** Calculation (left) and rationalization (right) of the difference in free energy for H and D isotopomers at the 5 position of 2-phenylthiophene

The free energy difference between the neutral and oxidized 2-phenylthiophene substrates (in the presence of the dinuclear Cu catalysts) with H at the 5-position is  $\Delta G_{\text{H}} = -11.376$  kcal/mol and with D is  $\Delta G_{\text{D}} = -11.416$  kcal/mol. (Figure S10) Therefore, the reaction with deuterium is more exergonic than the reaction with hydrogen by  $\Delta G_{(\text{D-H})} = -0.054$  kcal/mol. By examining the energy difference between the H and D isotopomers in the neutral molecule ( $\Delta G = -2.107$  kcal/mol) and in the radical cation ( $\Delta G = -2.161$  kcal/mol), we can conclude that the deuterium stabilizes the oxidized substrate relative to the hydrogen. This can

be rationalized by considering that deuterium is more inductively donating than hydrogen and therefore better stabilizes the carbocation of the oxidized substrate.

## 8. Validation of FTIR for Reaction Analysis<sup>2</sup>

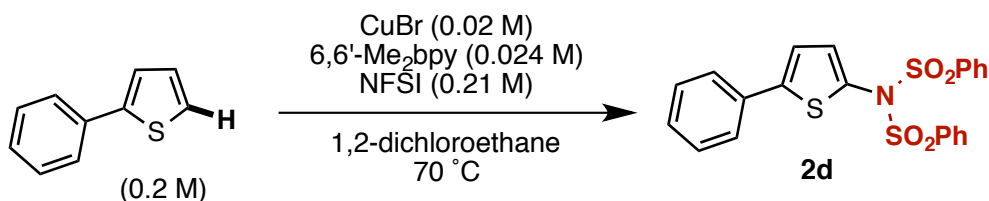

A three-necked reaction vessel equipped with a magnetic stirring bar was dried with a heat gun. CuBr (8.7 mg, 0.060 mmol, 10 mol%), 6,6'-Me<sub>2</sub>bpy (13.3 mg, 0.072 mmol, 12 mol%), NFSI (199 mg, 0.63 mmol, 1.05 equiv), and triphenylene (68.5 mmol, 0.3 mmol; an internal standard for <sup>1</sup>H NMR analysis) were added to the vessel. The IR probe was inserted through an adapter into the middle neck; another neck was capped by a rubber septum for the purpose of reagent injection, and the third one was jointed three-way cock in order to flow N<sub>2</sub> gas. This vessel was evacuated and purged with N<sub>2</sub> three times. 1,2-Dichloroethane (2 mL) was then added to the vessel and the mixture was heated to 70 °C in an oil bath. After stirring the mixture for 6 min, 2-phenylthiophene (0.6 M, 1,2-dichloroethane solution, 1 mL) was added to the vessel via a syringe and at this point the data collection was started. *In situ* IR spectra were recorded over the course of the reaction. The reaction was intermittently sampled by withdrawal of aliquots (ca. 0.1 mL) from the reaction mixture (30, 60, 120, 180, 240, 480 min). The aliquots were filtered over a pad of silica-gel and the yield was determined by <sup>1</sup>H NMR analysis. The time course of the product formation by FITR was in agreement with the NMR sampling method.

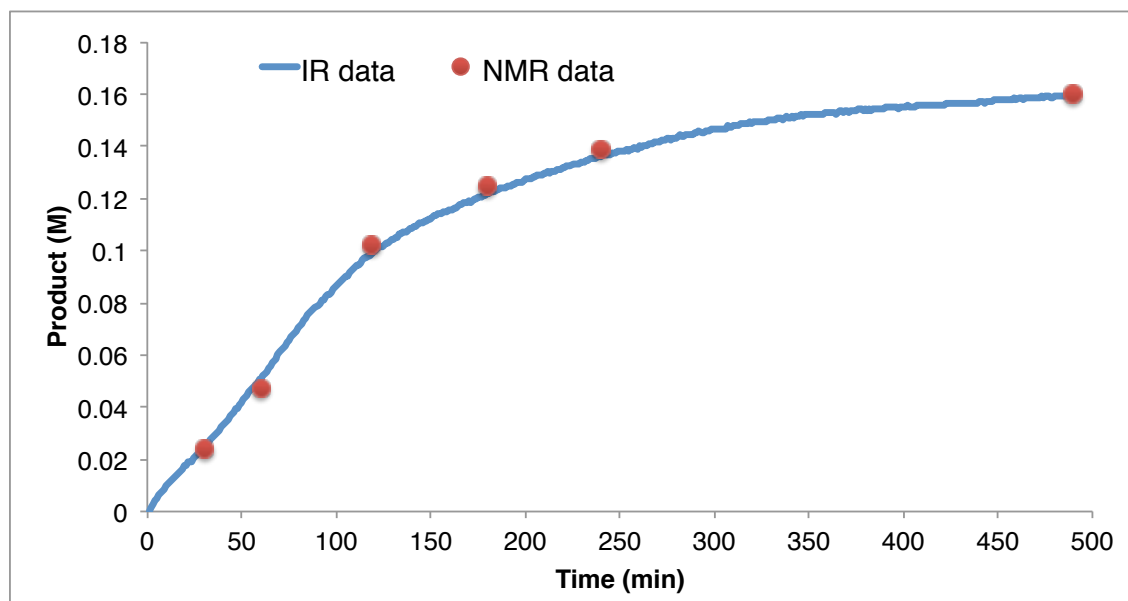

**Figure S11.** Comparison of conversion data through FTIR (blue line) and  $^1\text{H}$  NMR reaction sampling (red dots).

2) Kawakami, T.; Murakami, K.; Itami, K. *J. Am. Chem. Soc.* **2015**, *137*, 2460–2463.

## 9. Sample FTIR Spectra of Reaction Profile<sup>2</sup>

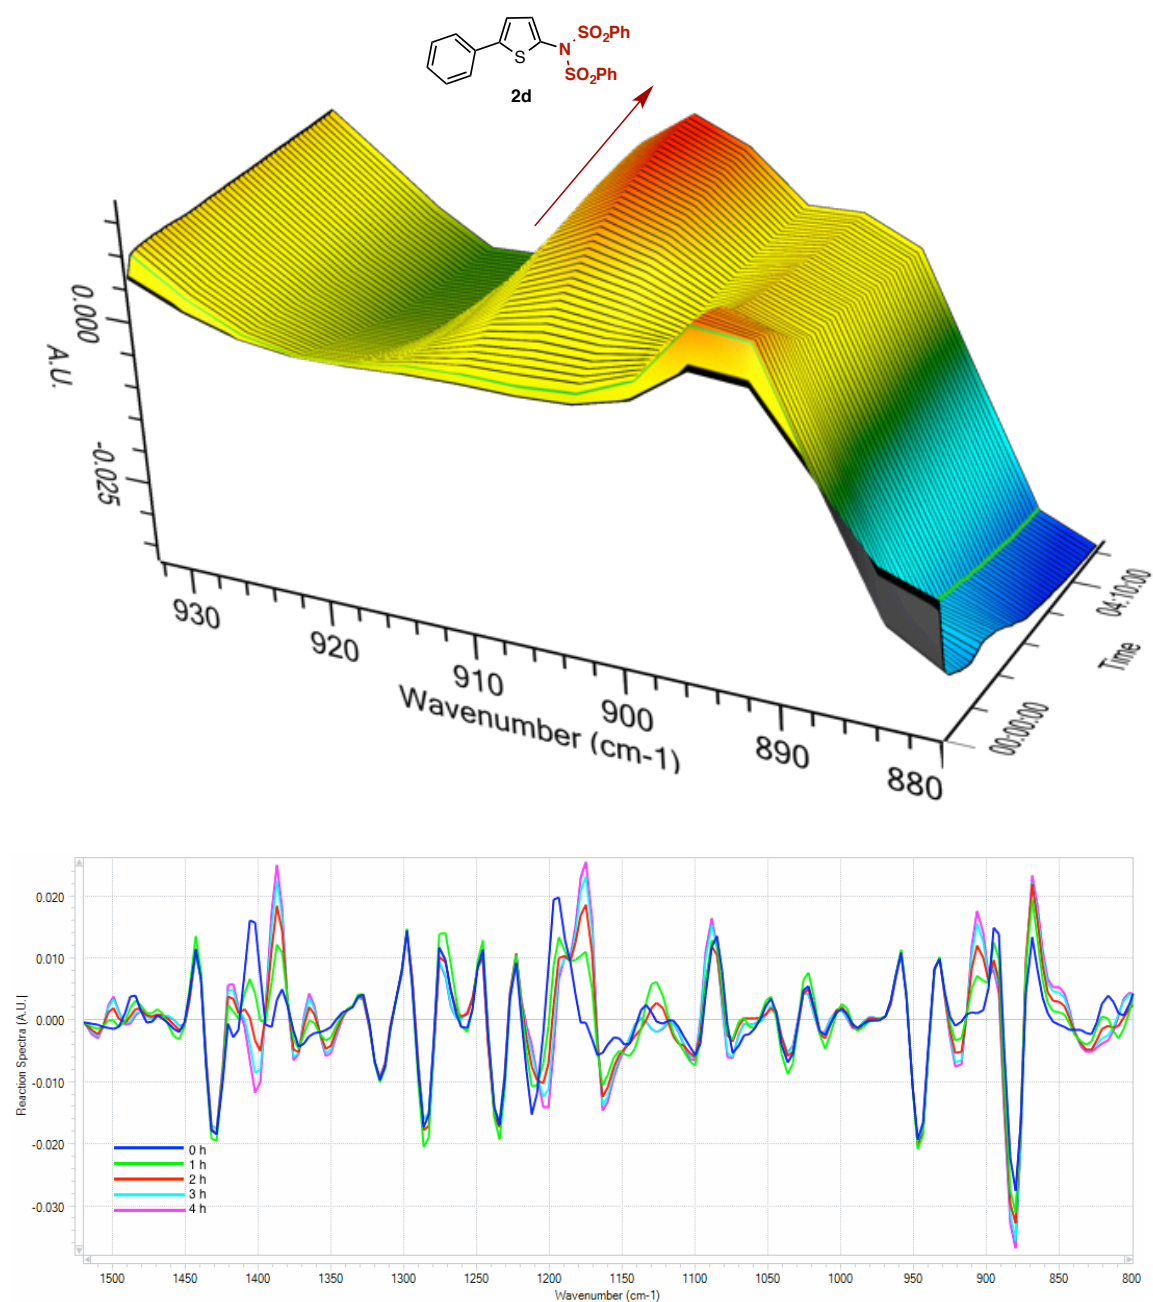

**Figure S12.** *In situ* IR profiles for the imidation of 2-phenylthiophene with NFSI under copper catalysis.

## 10. Independent Intermolecular KIE Experiments<sup>2</sup>

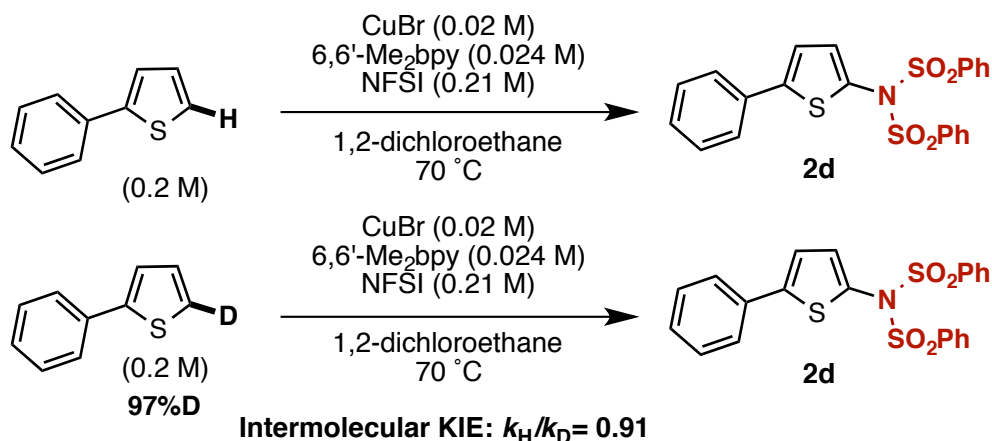

A three-necked reaction vessel equipped with a magnetic stirring bar was dried with a heat-gun. CuBr (8.7 mg, 0.060 mmol, 10 mol%), 6,6'-Me<sub>2</sub>bpy (13.3 mg, 0.072 mmol, 12 mol%), and NFSI (199 mg, 0.63 mmol, 1.05 equiv) were added to the vessel. The IR probe was inserted through an adapter into the middle neck; another neck was capped by a rubber septum for the purpose of reagent injection, and the third one was jointed three-way cock in order to flow N<sub>2</sub> gas. This vessel was evacuated and purged with N<sub>2</sub> three times. 1,2-Dichloroethane (2 mL) was then added to the vessel and the mixture was heated to 70 °C in an oil bath. After stirring the mixture for 6 min, 2-phenylthiophene (or 2-deuterio-5-phenylthiophene) (0.6 M, 1,2-dichloroethane solution, 1 mL) was added to the vessel via a syringe and at this point the data collection was started. *In situ* IR spectra were recorded over the course of the reaction. After 4 h, the mixture was cooled to an ambient temperature. Ethyl acetate was added to dilute the reaction mixture and then benzyl phenyl ether (10 mg, 0.0546 mmol; an internal standard for <sup>1</sup>H NMR analysis) was added. The mixture was immediately filtered over a pad of silica-gel and evaporated. The reaction yield was confirmed by <sup>1</sup>H NMR analysis. The experiments were performed three times for each substrate and the line plots were made with the average yields of the three runs.

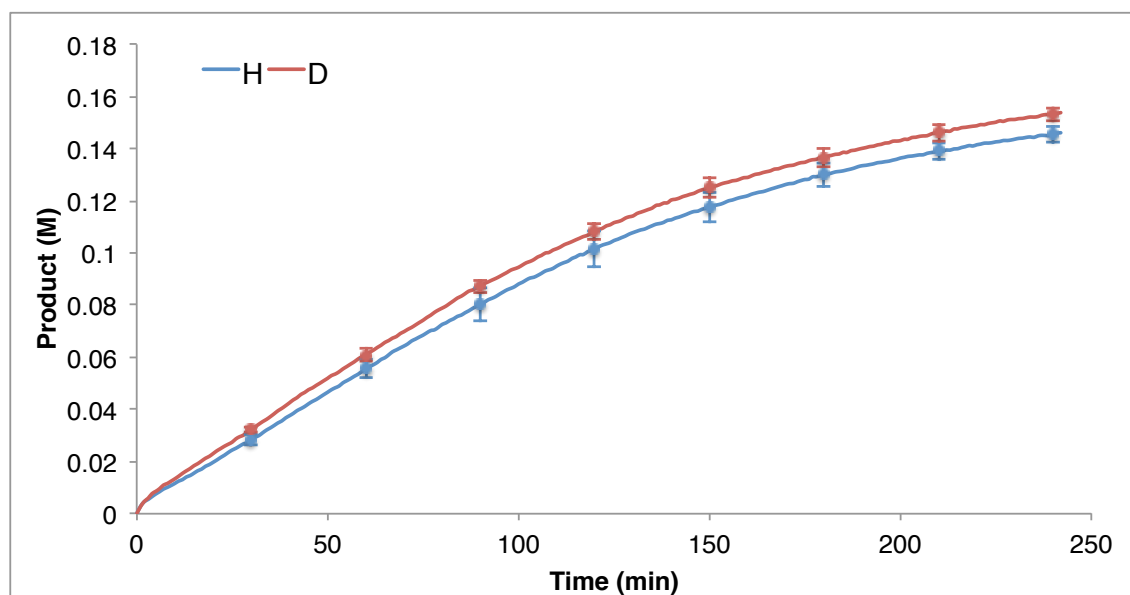

**Figure S13.** Intermolecular KIE experiments of two substrates. The top and bottom of each error bar indicate the highest and lowest concentration of the product **2d**, respectively. The line plots were made with the average of the three runs.

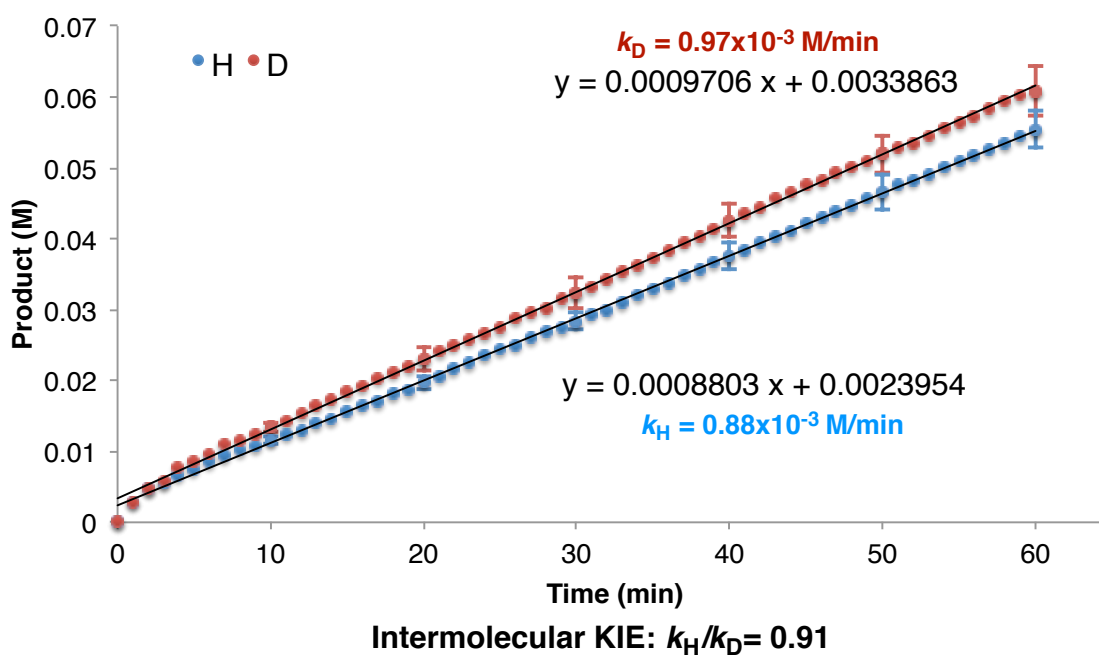

**Figure S14.** Inset picture of Figure S13. The top and bottom of each error bar indicate the highest and lowest concentration of the product **2d**, respectively. The line plots were made with the average of the three runs.

## 11. Characterization Data, $^1\text{H}$ and $^{13}\text{C}$ NMR Spectra

The high-resolution mass spectra were recorded on Thermo Fisher Scientific Exactive. Nuclear magnetic resonance (NMR) spectra were recorded on a JEOL JNM-ECA-600 ( $^1\text{H}$  600 MHz,  $^{13}\text{C}$  150 MHz) spectrometer. Chemical shifts for  $^1\text{H}$  NMR are expressed in parts per million (ppm) relative to tetramethylsilane ( $\delta$  0.00 ppm). Chemical shifts for  $^{13}\text{C}$  NMR are expressed in ppm relative to  $\text{CDCl}_3$  ( $\delta$  77.2 ppm). Data are reported as follows: chemical shift, multiplicity (s = singlet, d = doublet, dd = doublet of doublets, t = triplet, dt = doublet of triplets, td = triplet of doublets, q = quartet, m = multiplet, brs = broad singlet), coupling constant (Hz), and integration.

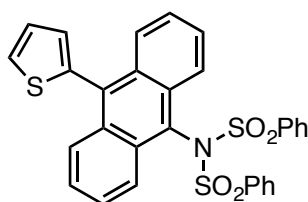

***N*-(Phenylsulfonyl)-*N*-(10-(thiophen-2-yl)anthracen-9-yl)benzenesulfonamide:**  $^1\text{H}$  NMR ( $\text{CDCl}_3$ )  $\delta$  7.15–7.18 (m, 2H), 7.23 (d,  $J = 3.6$  Hz, 1H), 7.31–7.33 (m, 3H), 7.50 (t,  $J = 7.8$  Hz, 4H), 7.60 (d,  $J = 9.0$  Hz, 2H), 7.64 (d,  $J = 5.4$  Hz, 1H), 7.70 (t,  $J = 7.8$  Hz, 2H), 7.81 (d,  $J = 9.0$  Hz, 2H), 7.61 (d,  $J = 12.0$  Hz, 4H);  $^{13}\text{C}$  NMR ( $\text{CDCl}_3$ )  $\delta$  124.92, 125.93, 126.58, 127.14, 127.29, 127.40, 128.08, 129.11, 129.98, 131.78, 132.63, 133.36, 134.45, 138.24, 139.44 (one  $\text{sp}^2$  signal was not observed because of overlapping); HR-MS (ESI-MS, positive):  $m/z = 578.0525$ . calcd for  $\text{C}_{30}\text{H}_{21}\text{NO}_4\text{S}_3\text{Na}$ : 578.0525 [ $M + \text{Na}$ ] $^+$ .

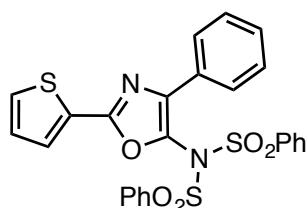

***N*-(4-Phenyl-2-(thiophen-2-yl)oxazol-5-yl)-*N*-(phenylsulfonyl)benzenesulfonamide:**  $^1\text{H}$  NMR ( $\text{CDCl}_3$ )  $\delta$  7.13–7.23 (m, 4H), 7.44 (t,  $J = 7.8$  Hz, 4H), 7.51 (d,  $J = 4.2$  Hz, 1H), 7.61 (t,  $J = 7.8$  Hz, 2H), 7.64 (d,  $J = 4.2$  Hz, 1H), 7.67 (d,  $J = 7.8$  Hz, 2H), 7.96 (d,  $J = 7.8$  Hz, 4H);  $^{13}\text{C}$  NMR ( $\text{CDCl}_3$ )  $\delta$  127.04, 128.29, 128.57, 129.12, 129.17, 129.23, 129.54, 129.86, 132.67, 134.67, 139.27, 140.92, 157.05 (two  $\text{sp}^2$  signals were not observed because of overlapping); HR-MS (ESI-MS, positive):  $m/z = 545.0273$ . calcd for  $\text{C}_{25}\text{H}_{18}\text{N}_2\text{O}_5\text{S}_3\text{Na}$ : 545.0270 [ $M + \text{Na}$ ] $^+$ .



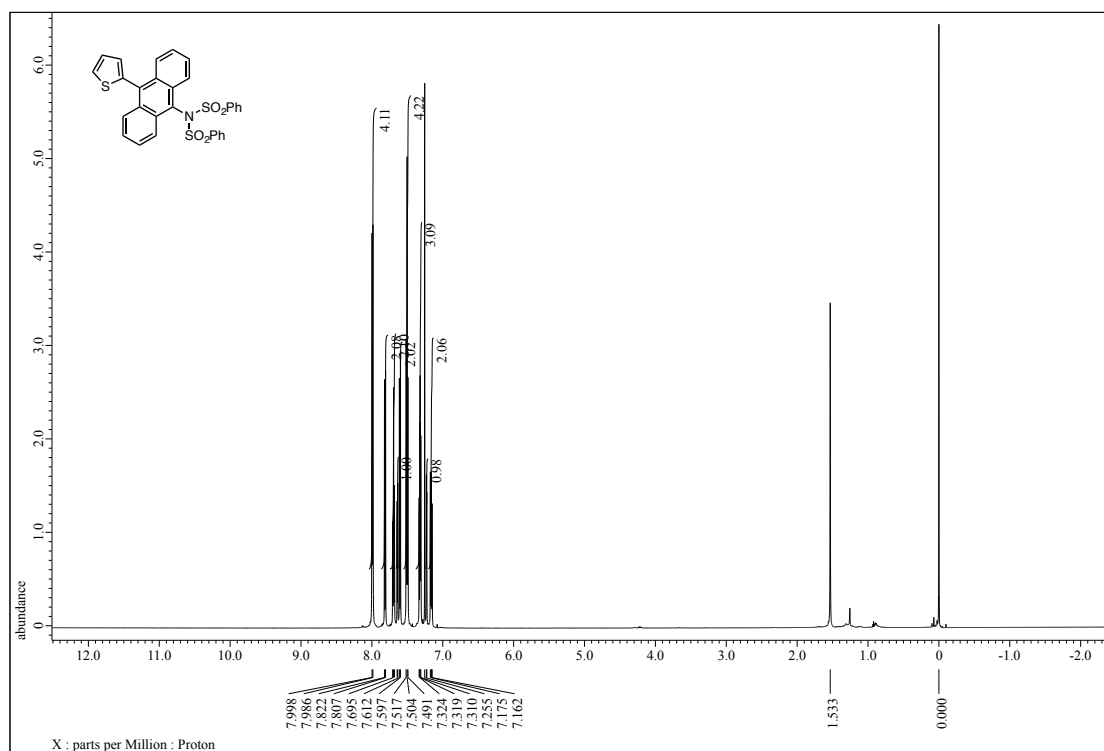

**Figure S15.** <sup>1</sup>H NMR spectrum of *N*-(phenylsulfonyl)-*N*-(10-(thiophen-2-yl)anthracen-9-yl)benzenesulfonamide.

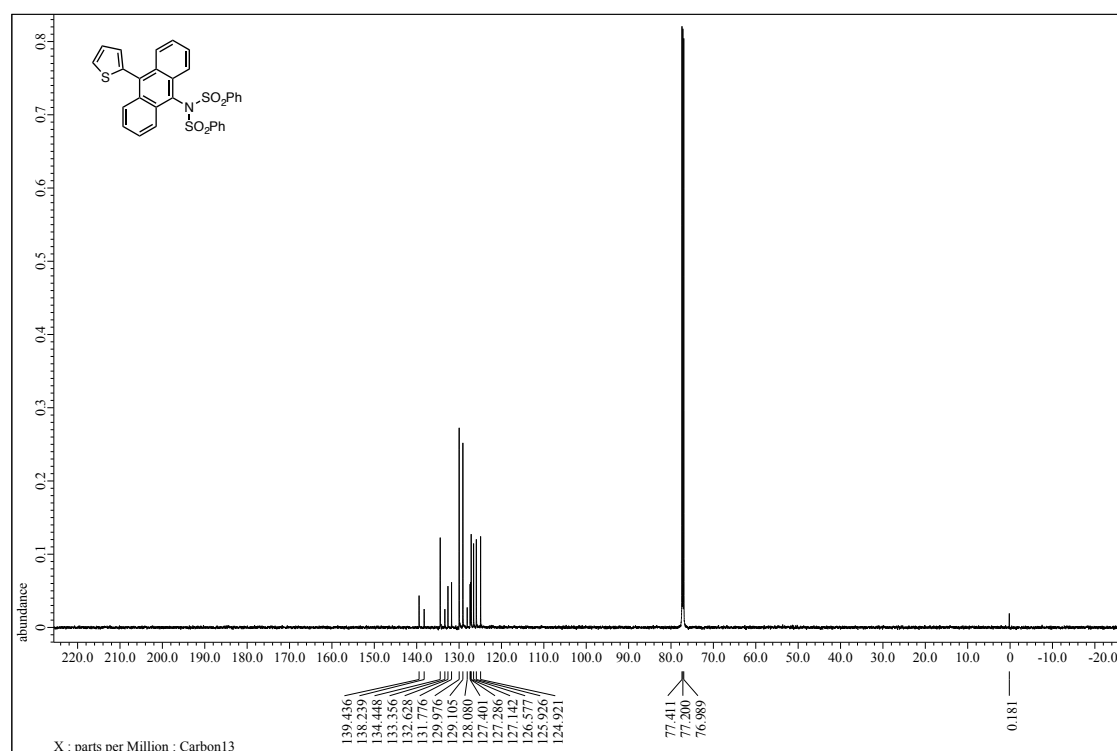

**Figure S16.** <sup>13</sup>C NMR spectrum of *N*-(phenylsulfonyl)-*N*-(10-(thiophen-2-yl)anthracen-9-yl)benzenesulfonamide.



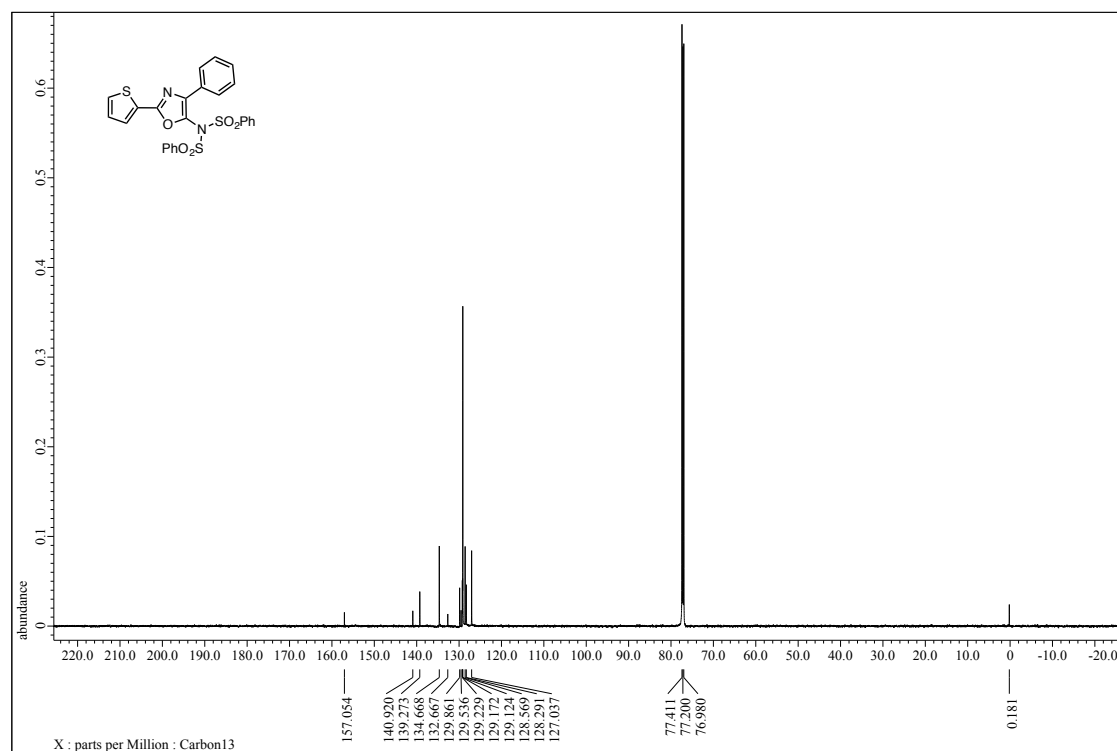

**Figure S18.**  $^{13}\text{C}$  NMR spectrum of *N*-(4-phenyl-2-(thiophen-2-yl)oxazol-5-yl)-*N*-(phenylsulfonyl)benzenesulfonamide.

## 12. Energies and Cartesian Coordinates

The electronic energies calculated at B3LYP-D3/BS1 [6-31G(d,p) + Lan12dz (Cu, Br, I)] and B3LYP-D3/BS2 [6-311+G(d,p) + SDD (Cu, Br, and I)] levels of theory are provided, as well as the applied zero point energy (ZPE), enthalpy (H) and free energy (G) corrections calculated at the B3LYP-D3/BS1 level. The provided Cartesian coordinates are generated from geometry optimizations at the B3LYP-D3/BS1 level. Bulk solvent effects are incorporated for all calculations using the self-consistent reaction field polarizable continuum model (IEF-PCM) with 1,2-dichloroethane (DCE) as the solvent.

|                       |             |             |             |   |                                     |
|-----------------------|-------------|-------------|-------------|---|-------------------------------------|
| <b>NFSI</b>           |             |             |             |   |                                     |
| E(BS1) = -1714.996896 |             |             |             |   |                                     |
| E(BS2) = -1715.292232 |             |             |             |   |                                     |
| ZPE = 0.208663        |             |             |             |   |                                     |
| H = 0.227581          |             |             |             |   |                                     |
| G = 0.163274          |             |             |             |   |                                     |
| S                     | -1.42586100 | 1.63006400  | -0.17098700 |   |                                     |
| O                     | -1.68086400 | 2.34302600  | -1.41947500 |   |                                     |
| O                     | -1.34196000 | 2.31634600  | 1.11408800  |   |                                     |
| N                     | 0.25134300  | 0.99259400  | -0.40551100 |   |                                     |
| S                     | 0.76289800  | -0.39545300 | 0.64454000  |   |                                     |
| O                     | 0.15304700  | -1.62590300 | 0.14280400  |   |                                     |
| O                     | 0.51929800  | 0.08780200  | 2.00274000  |   |                                     |
| C                     | 2.49660400  | -0.38266600 | 0.26411300  |   |                                     |
| C                     | 2.95693600  | -1.17066900 | -0.79366400 |   |                                     |
| C                     | 3.34198300  | 0.42975400  | 1.02410300  |   |                                     |
| C                     | 4.31790800  | -1.14128800 | -1.09252300 |   |                                     |
| H                     | 2.26893100  | -1.79073700 | -1.35593900 |   |                                     |
|                       |             |             |             | C | 4.69971400 0.44171100 0.71124400    |
|                       |             |             |             | H | 2.94548800 1.02506800 1.83851800    |
|                       |             |             |             | C | 5.18305300 -0.33865300 -0.34345000  |
|                       |             |             |             | H | 4.70155500 -1.74594400 -1.90728100  |
|                       |             |             |             | H | 5.37846100 1.05871500 1.29023500    |
|                       |             |             |             | H | 6.24167400 -0.32216100 -0.58209200  |
|                       |             |             |             | C | -2.47389900 0.20364300 -0.05932400  |
|                       |             |             |             | C | -2.81644000 -0.27885900 1.20616600  |
|                       |             |             |             | C | -2.85846700 -0.43539200 -1.24124200 |
|                       |             |             |             | C | -3.58460100 -1.43880900 1.28195800  |
|                       |             |             |             | H | -2.48454200 0.23959600 2.09758600   |
|                       |             |             |             | C | -3.62246000 -1.59597400 -1.14252500 |
|                       |             |             |             | H | -2.57223500 -0.03019100 -2.20441900 |
|                       |             |             |             | C | -3.98190500 -2.09437000 0.11334400  |
|                       |             |             |             | H | -3.86988400 -1.83075700 2.25234500  |
|                       |             |             |             | H | -3.93692400 -2.11001800 -2.04450800 |
|                       |             |             |             | H | -4.57612900 -3.00003500 0.18131000  |
|                       |             |             |             | F | 0.25170900 0.42722800 -1.70811600   |

**1-Br**

E(BS1) = -783.515223  
E(BS2) = -785.058555  
ZPE = 0.215459  
H = 0.232695  
G = 0.167969  
Cu -0.88986400 -0.04687500 0.02603900  
N 0.74690600 -1.34155600 0.00522800  
C 0.66890300 -2.68589500 0.02745400  
C 1.82494100 -3.47407600 0.03671400  
C 3.06928900 -2.85104300 0.03124300  
C 3.13847600 -1.46011300 0.01284300  
C 1.94924200 -0.72494700 -0.00421200  
N 0.70997400 1.34618900 0.08437500  
C 0.59151900 2.68709300 0.08918500  
C 1.71793000 3.51008500 -0.03042600  
C 2.97416600 2.92557100 -0.15567600  
C 3.08636800 1.53698000 -0.15267700  
C 1.92592600 0.76769900 -0.02504400  
H 1.74088800 -4.55493700 0.05105800  
H 4.10213000 -0.96775300 0.01961300  
H 4.05889300 1.07387700 -0.25800400  
H 1.60094200 4.58807800 -0.02679300  
H 3.98011400 -3.44098600 0.04375100  
H 3.86105400 3.54281900 -0.25715300  
C -0.79307200 3.24954900 0.25161000  
H -1.50022200 2.71433400 -0.38844400  
H -1.13268700 3.11001100 1.28421000  
H -0.82265200 4.31626900 0.01991200  
C -0.70961900 -3.28415000 0.05445900  
H -1.20593900 -3.03560700 0.99875200  
H -1.32225900 -2.85667500 -0.74498600  
H -0.68016500 -4.37036700 -0.05170500  
Br -3.26862000 0.03319400 -0.14185600

**2-Br**

E(BS1) = -2498.515745  
E(BS2) = -2500.370043  
ZPE = 0.425386  
H = 0.462376  
G = 0.354616  
Cu -1.57218200 -0.09349700 0.97903800  
N -2.48532800 -0.29441900 -0.92182600  
C -2.33239400 -1.32468400 -1.77316400  
C -3.15477200 -1.45786800 -2.89827000  
C -4.13862700 -0.50412000 -3.13606200  
C -4.27748900 0.56835800 -2.25756000  
C -3.42168800 0.64956800 -1.15649900  
N -2.81392700 1.58627800 0.98079800  
C -2.80493900 2.54641100 1.92336900  
C -3.49465600 3.74837000 1.73187200  
C -4.17792900 3.95500100 0.53688000  
C -4.17248600 2.95790300 -0.43529200  
C -3.48313200 1.77012200 -0.17612900  
C -1.99293500 2.27731800 3.15823700  
C -1.21424800 -2.28522400 -1.48639800  
Br -0.34707200 -1.51144800 2.48656600  
F 0.63600700 0.27443300 -0.83218900  
N 1.10385700 1.43342300 -1.50972900  
S 1.18903700 2.69021200 -0.22663000  
S -0.11743700 1.73332100 -2.83352700

H -3.01438400 -2.29679600 -3.57088400  
H -5.04746800 1.31135000 -2.42274200  
H -4.67659600 3.11492700 -1.38030300  
H -3.48131100 4.50704100 2.50666300  
H -4.79464900 -0.59203000 -3.99640600  
H -4.70598600 4.88656900 0.35910000  
H -2.13551800 1.24495300 3.48958700  
H -0.93115800 2.39503300 2.91837500  
H -2.24931900 2.96339100 3.96861500  
H -0.26722500 -1.81566800 -1.77087500  
H -1.16024600 -2.50482000 -0.41608700  
H -1.32790000 -3.21506400 -2.04813300  
C 0.91492900 2.69441000 -3.91125500  
O -0.32437500 0.39294100 -3.37632600  
O -1.23804400 2.54062500 -2.34984600  
C 2.54881300 2.03335400 0.69958200  
O 1.57658200 3.88084600 -0.98504600  
O -0.02249100 2.66210700 0.59112100  
C 1.88891000 2.03138200 -4.66366000  
C 2.68699500 2.78655400 -5.52036300  
C 2.50083600 4.16984200 -5.61344300  
C 0.71199900 4.07381300 -3.98731800  
C 1.51795400 4.81081900 -4.85361900  
H 2.01134500 0.95727000 -4.58246500  
H 3.45020800 2.29631400 -6.11544600  
H 3.12600000 4.75153900 -6.28363300  
H -0.04912500 4.54865600 -3.38047900  
H 1.37903000 5.88383900 -4.93296100  
C 3.84476700 2.44799600 0.37984200  
C 4.90370400 1.91291400 1.11108200  
C 4.65594200 0.97939100 2.12346600  
C 2.27531400 1.10288000 1.70554400  
C 3.35052600 0.57447900 2.41796500  
H 4.01088300 3.17180700 -0.41008900  
H 5.91978600 2.22300500 0.89048500  
H 5.48717800 0.56420500 2.68490000  
H 1.25962200 0.78724000 1.91728500  
H 3.16309000 -0.15527000 3.19862200

**TS-F-Br**

E(BS1) = -2498.503562  
E(BS2) = -2500.363497  
ZPE = 0.424088  
H = 0.459557  
G = 0.355759  
<S<sup>2</sup>> = 0.1802  
732.0170i  
Cu -1.49326500 -0.04671500 0.77082900  
N -2.68859900 -0.32910500 -0.90112000  
C -2.55529300 -1.35226300 -1.76336900  
C -3.40570700 -1.46617100 -2.86815100  
C -4.39545400 -0.50803300 -3.06235600  
C -4.52347800 0.54292500 -2.15662300  
C -3.64133100 0.61021100 -1.07564700  
N -2.90280600 1.52835500 1.03199500  
C -2.89348900 2.44493000 2.01606000  
C -3.70461000 3.58414000 1.94248000  
C -4.51314300 3.77100500 0.82677000  
C -4.51265100 2.81527300 -0.18723800  
C -3.69519500 1.69088300 -0.05100200  
C -1.95899300 2.21017500 3.16800500

C -1.45262900 -2.33152100 -1.48343300  
Br -0.61006000 -1.41866000 2.58377500  
F 0.17894800 0.19441500 -0.36559200  
N 1.02122300 1.29699500 -1.30733200  
S 1.18606700 2.61599200 -0.14669400  
S -0.12531300 1.52354800 -2.64531600  
H -3.28433800 -2.29395400 -3.55759600  
H -5.30208500 1.28240100 -2.29138200  
H -5.12922200 2.95615900 -1.06548100  
H -3.68762100 4.30918600 2.74869400  
H -5.06900000 -0.57842900 -3.91053900  
H -5.14056600 4.65265900 0.74292900  
H -1.90958300 1.14572200 3.41033300  
H -0.95067700 2.52482700 2.87989000  
H -2.26241600 2.77740700 4.05073900  
H -0.49392200 -1.81312100 -1.56112000  
H -1.53749800 -2.71107300 -0.45979900  
H -1.47071900 -3.16967300 -2.18249600  
C 0.92640500 2.45022100 -3.73817600  
O -0.31017400 0.17058000 -3.16895900  
O -1.27573200 2.33593300 -2.24115200  
C 2.44298700 1.91193200 0.88931200  
O 1.73592300 3.71532700 -0.94856600  
O -0.04431400 2.80678900 0.62414700  
C 1.93012700 1.76821400 -4.43366400  
C 2.74630900 2.49514300 -5.29773700  
C 2.54933500 3.87097700 -5.45542900  
C 0.71432000 3.82365100 -3.87947900  
C 1.53667600 4.53209100 -4.75312800  
H 2.05927300 0.69968400 -4.30403600  
H 3.53188700 1.98872200 -5.84868800  
H 3.18850000 4.43101900 -6.13089600  
H -0.07072600 4.31474200 -3.31744500  
H 1.38826800 5.59885700 -4.88396700  
C 3.78255400 2.16583300 0.58179300  
C 4.76387200 1.60766900 1.39940900  
C 4.39846600 0.80964000 2.48873400  
C 2.05487500 1.11975800 1.97167400  
C 3.05174900 0.56525900 2.77278200  
H 4.04139500 2.78837800 -0.26719400  
H 5.81119600 1.79491900 1.18618200  
H 5.16883100 0.37532800 3.11842800  
H 1.00942800 0.92564900 2.17638500  
H 2.77094200 -0.06044300 3.61347500

### 3-F-Br

E(BS1) = -2498.530511

E(BS2) = -2500.396956

ZPE = 0.425799

H = 0.462328

G = 0.356854

$\langle S^2 \rangle = 0.9584$

Cu -1.28050600 0.37079600 0.33197800  
N -2.89386900 -0.05915700 -1.02173900  
C -2.92743900 -0.94389800 -2.03259200  
C -4.02972100 -0.98793400 -2.90172800  
C -5.09181200 -0.11759300 -2.70977000  
C -5.05589000 0.77531200 -1.63863600  
C -3.93947000 0.77426600 -0.80309900  
N -2.66201000 1.61972100 1.07144100  
C -2.45412300 2.40964100 2.14760400

C -3.45900000 3.28093500 2.58068000  
C -4.66673600 3.33288900 1.89484500  
C -4.85494100 2.52264100 0.77936500  
C -3.82562800 1.66890200 0.37766700  
C -1.12676700 2.34095600 2.84349100  
C -1.78997000 -1.90722900 -2.21222800  
Br -1.30640100 -1.29884500 2.29694300  
F 0.19870600 -0.42018700 -0.45051600  
N 1.65360900 1.00847500 -1.59948000  
S 1.27429100 2.32110500 -0.57493300  
S 0.69225500 0.75675800 -3.03010500  
H -4.03293400 -1.70582000 -3.71477000  
H -5.88372300 1.45170000 -1.47219500  
H -5.79073800 2.55681400 0.23830100  
H -3.28133400 3.90635300 3.44767100  
H -5.94730400 -0.13244900 -3.37724700  
H -5.45741500 3.99994200 2.22216600  
H -0.88894000 1.30656400 3.10433900  
H -0.33976000 2.69820600 2.17469700  
H -1.12989000 2.95110400 3.74802200  
H -1.36661100 -1.80796100 -3.21539300  
H -0.99417800 -1.72449200 -1.49460300  
H -2.16062600 -2.93275600 -2.10537400  
C 1.55256300 1.89044600 -4.10180100  
O 1.00183500 -0.61546700 -3.43238300  
O -0.69771800 1.19782900 -2.87741600  
C 2.29264500 1.94849200 0.83997000  
O 1.75321000 3.54453900 -1.23357700  
O -0.15328000 2.30808200 -0.16075500  
C 2.75697500 1.47911300 -4.68374900  
C 3.43536300 2.37361600 -5.50894800  
C 2.91143500 3.65031400 -5.73686500  
C 1.01506400 3.16343700 -4.31562600  
C 1.70520700 4.04302100 -5.14611700  
H 3.13966700 0.48183100 -4.49871600  
H 4.36912300 2.07529300 -5.97405100  
H 3.44536500 4.34346000 -6.37950700  
H 0.08103900 3.44648700 -3.84499500  
H 1.30365400 5.03358400 -5.33270600  
C 3.15891600 2.94799700 1.28833400  
C 3.89752000 2.71175700 2.44866500  
C 3.76407000 1.49939900 3.13011000  
C 2.14605000 0.72410700 1.50108400  
C 2.89617900 0.51030500 2.65588700  
H 3.24968600 3.88068100 0.74352800  
H 4.57567200 3.47481700 2.81657700  
H 4.34141800 1.32256700 4.03235000  
H 1.47812100 -0.03223200 1.10560600  
H 2.79924100 -0.43227000 3.18471800

### TS-F-Br'

E(BS1) = -2498.499306

E(BS2) = -2500.360945

ZPE = 0.424886

H = 0.460842

G = 0.356904

64.3497i

Cu -1.43454200 0.22939100 0.65119900  
N -2.75337600 -0.23367800 -0.90723700  
C -2.60596800 -1.23242500 -1.79365700  
C -3.44212200 -1.30592100 -2.91460600

|    |             |             |             |    |             |             |             |
|----|-------------|-------------|-------------|----|-------------|-------------|-------------|
| C  | -4.42717800 | -0.34076200 | -3.09310000 | Cu | -1.26406300 | 0.31990300  | 0.45594800  |
| C  | -4.58594600 | 0.66727800  | -2.14367500 | N  | -2.85661700 | -0.03667800 | -1.04807300 |
| C  | -3.72555100 | 0.69202700  | -1.04457700 | C  | -2.91312700 | -0.91713200 | -2.05775500 |
| N  | -2.92951300 | 1.57566100  | 1.06144000  | C  | -4.02526000 | -0.93661400 | -2.91724300 |
| C  | -2.94904500 | 2.42789300  | 2.10480800  | C  | -5.06716100 | -0.04290400 | -2.71542400 |
| C  | -3.90519100 | 3.44832200  | 2.16946400  | C  | -5.00295900 | 0.85311800  | -1.64763100 |
| C  | -4.83071500 | 3.58393100  | 1.14120400  | C  | -3.87513900 | 0.82448100  | -0.82817500 |
| C  | -4.79443000 | 2.69875400  | 0.06662100  | N  | -2.60568800 | 1.54240000  | 1.11015400  |
| C  | -3.82594500 | 1.69336200  | 0.05102600  | C  | -2.34451500 | 2.28837900  | 2.20465400  |
| C  | -1.90567500 | 2.25242800  | 3.16884000  | C  | -3.26295700 | 3.26820800  | 2.59009600  |
| C  | -1.53054300 | -2.24274300 | -1.51944300 | C  | -4.41679000 | 3.46464100  | 1.83946400  |
| Br | -0.83344900 | -1.28400500 | 2.53133300  | C  | -4.64616700 | 2.68468200  | 0.71105800  |
| F  | 0.14352800  | 0.01762100  | -0.33157400 | C  | -3.71737300 | 1.70684800  | 0.34889900  |
| N  | 1.19642500  | 1.21049400  | -1.38645800 | C  | -1.07264400 | 2.05051100  | 2.96253100  |
| S  | 1.21417200  | 2.48787800  | -0.22952800 | C  | -1.77262000 | -1.87147900 | -2.25145900 |
| S  | 0.08967700  | 1.35220900  | -2.71883500 | Br | -2.09009700 | -1.36880400 | 2.09240000  |
| H  | -3.31207500 | -2.11155500 | -3.62821800 | F  | 0.03868700  | -0.74576900 | -0.03826000 |
| H  | -5.36470300 | 1.40860300  | -2.26638700 | N  | 1.66516100  | 1.03721800  | -1.53132600 |
| H  | -5.50908300 | 2.79572700  | -0.73982100 | S  | 1.14077900  | 2.19040000  | -0.57328300 |
| H  | -3.90939400 | 4.12262700  | 3.01812800  | S  | 0.88441700  | 0.71819800  | -2.96177800 |
| H  | -5.07928900 | -0.37617500 | -3.95985900 | H  | -4.05526300 | -1.65476000 | -3.72946700 |
| H  | -5.57695800 | 4.37116100  | 1.17248100  | H  | -5.81922100 | 1.54008400  | -1.46575300 |
| H  | -1.88268700 | 1.21456500  | 3.51024000  | H  | -5.53514200 | 2.83752600  | 0.11425000  |
| H  | -0.91947200 | 2.47609300  | 2.75114700  | H  | -3.05607100 | 3.86361400  | 3.47120100  |
| H  | -2.09146600 | 2.91442200  | 4.01653700  | H  | -5.93122700 | -0.04467300 | -3.37172700 |
| H  | -0.55551900 | -1.76573500 | -1.62916200 | H  | -5.13486100 | 4.22467700  | 2.12829300  |
| H  | -1.60976200 | -2.59634400 | -0.48657700 | H  | -0.99780300 | 1.00159800  | 3.26229900  |
| H  | -1.60126200 | -3.09184100 | -2.20155000 | H  | -0.21319600 | 2.27970400  | 2.32763400  |
| C  | 1.09552300  | 2.32491700  | -3.82219000 | H  | -1.03339700 | 2.67797700  | 3.85318300  |
| O  | -0.01993500 | -0.00716600 | -3.25364500 | H  | -1.10381800 | -1.49132000 | -3.02849200 |
| O  | -1.11864900 | 2.10548800  | -2.36037500 | H  | -1.18217700 | -1.96043600 | -1.34170900 |
| C  | 2.48829700  | 1.87993800  | 0.85118400  | H  | -2.14541100 | -2.85123200 | -2.56274800 |
| O  | 1.69159600  | 3.68106300  | -0.94455300 | C  | 1.64326400  | 1.84753000  | -4.13519100 |
| O  | -0.05464000 | 2.57708600  | 0.51626000  | O  | 1.28614700  | -0.64536800 | -3.34262700 |
| C  | 2.10748500  | 1.68239400  | -4.54375400 | O  | -0.55477900 | 1.04341800  | -2.91122800 |
| C  | 2.89093000  | 2.44267100  | -5.40949200 | C  | 2.17448800  | 1.97193000  | 0.86708100  |
| C  | 2.65730100  | 3.81544700  | -5.54186400 | O  | 1.26594300  | 3.58155900  | -1.05648800 |
| C  | 0.84929300  | 3.69543600  | -3.93808900 | O  | -0.31391100 | 2.00214600  | -0.08488600 |
| C  | 1.63895400  | 4.43875000  | -4.81270600 | C  | 2.74394400  | 1.41956600  | -4.87929800 |
| H  | 2.26482900  | 0.61552000  | -4.43296900 | C  | 3.34208300  | 2.31115200  | -5.77149500 |
| H  | 3.67985400  | 1.96498700  | -5.98112100 | C  | 2.84093400  | 3.60853600  | -5.90760600 |
| H  | 3.27155700  | 4.40270100  | -6.21741200 | C  | 1.12936100  | 3.13999000  | -4.26095200 |
| H  | 0.06136500  | 4.15736600  | -3.35592600 | C  | 1.73671500  | 4.02121000  | -5.15493500 |
| H  | 1.46103000  | 5.50328300  | -4.92455600 | H  | 3.11224800  | 0.40632900  | -4.76411700 |
| C  | 3.80722500  | 2.27415200  | 0.61319300  | H  | 4.19660200  | 1.99152700  | -6.35987800 |
| C  | 4.80479700  | 1.79757400  | 1.46312000  | H  | 3.30986600  | 4.29916200  | -6.60207400 |
| C  | 4.47602500  | 0.94311800  | 2.52013000  | H  | 0.27692400  | 3.44545700  | -3.66590300 |
| C  | 2.13736500  | 1.02864100  | 1.90084200  | H  | 1.34739100  | 5.02859800  | -5.26532000 |
| C  | 3.14911000  | 0.56068000  | 2.73806700  | C  | 2.87050500  | 3.08146700  | 1.34753300  |
| H  | 4.03870700  | 2.94178200  | -0.20900400 | C  | 3.62936500  | 2.94094200  | 2.51140400  |
| H  | 5.83584300  | 2.09450300  | 1.30071600  | C  | 3.67773500  | 1.71152000  | 3.17231400  |
| H  | 5.25792100  | 0.57466100  | 3.17707700  | C  | 2.20869400  | 0.73161500  | 1.51294300  |
| H  | 1.10863300  | 0.72933800  | 2.05700000  | C  | 2.96984500  | 0.61205800  | 2.67455300  |
| H  | 2.89668800  | -0.10442800 | 3.55758200  | H  | 2.81754600  | 4.02650100  | 0.81924800  |

### 3-F-Br'

E(BS1) = -2498.051197

E(BS2) = -2498.156823

ZPE = 0.427362

H = 0.462976

G = 0.360368

### 2-N-Br

E(BS1) = -2498.518503

E(BS2) = -2500.370899  
ZPE = 0.425754  
H = 0.462368  
G = 0.357694  
N 0.96951500 0.16720000 -0.31440600  
S 2.64777600 -0.26560800 -0.99129800  
S 0.39669100 1.88086300 -0.66061400  
C 3.04034100 -1.62196100 0.07621000  
O 3.57168600 0.84077100 -0.74221300  
O 2.31912900 -0.70169100 -2.34472400  
C 1.60646400 2.97421200 0.03759200  
O -0.82943500 1.97890700 0.12277600  
O 0.41367400 1.93749700 -2.12079100  
C 2.63727600 -2.90459500 -0.29671400  
C 3.72025200 -1.35491100 1.27086300  
C 1.60294700 3.17601500 1.42153100  
C 2.51086900 3.60965200 -0.81597400  
C 2.92845900 -3.96009600 0.56740800  
H 2.08950900 -3.06845400 -1.21666400  
C 3.99892200 -2.42350200 2.11828500  
H 4.01840600 -0.34344800 1.52041700  
C 2.55192900 4.04153300 1.96166200  
H 0.87612000 2.67679100 2.05055900  
C 3.44270200 4.48113500 -0.25673600  
H 2.48279300 3.42094500 -1.88220800  
C 3.60129400 -3.71986600 1.76757400  
H 2.62016900 -4.96563700 0.30169200  
H 4.52484200 -2.24680000 3.05055000  
C 3.46648300 4.68982800 1.12558300  
H 2.57296600 4.21353600 3.03263300  
H 4.15170800 4.99231700 -0.89926900  
H 3.81937700 -4.54633000 2.43673600  
H 4.20021600 5.36529400 1.55420800  
F 1.16927500 0.21136300 1.10164600  
Cu -0.67322900 -1.38571900 -0.79567600  
C -1.79467200 -1.18881800 3.45858200  
C -2.87018000 -0.30647800 3.41922600  
C -3.34045900 0.14554500 2.18816700  
C -2.71073400 -0.29780500 1.02089600  
C -1.19618800 -1.58522900 2.25682000  
C -3.16145500 0.11783900 -0.33966000  
C -4.37642500 0.77471800 -0.55720600  
C -4.71716200 1.14331100 -1.85699000  
H -5.65413800 1.65651500 -2.04940200  
C -3.85087900 0.83995400 -2.90292900  
C -2.65771000 0.16257400 -2.62404400  
H -1.41547700 -1.56754300 4.40158000  
H -3.34328500 0.02603400 4.33787200  
H -4.08971500 1.11399900 -3.92469600  
N -1.65140600 -1.13352200 1.07488500  
N -2.33538000 -0.18043900 -1.36433900  
C -1.67209600 -0.21277600 -3.69374100  
H -0.73601600 0.33131600 -3.53530900  
H -1.44083600 -1.28054000 -3.62152200  
H -2.05291500 0.01406800 -4.69198600  
C -0.01440000 -2.51454300 2.21974700  
H -0.07781600 -3.16733800 1.34466800  
H 0.91081200 -1.93882700 2.12390500  
H 0.05080000 -3.12033300 3.12649900  
H -4.17082400 0.83883300 2.14695400  
H -5.05354700 0.98584600 0.26071600

Br -0.47466900 -3.56875000 -1.94331800  
**TS-N-F-Br**  
E(BS1) = -2498.493445  
E(BS2) = -2500.353687  
ZPE = 0.424025  
H = 0.460370  
G = 0.356392  
<S<sup>2</sup>> = 0.3785  
858.2295i  
N 0.54719600 -0.04778900 -0.62199800  
S 1.98047700 -0.44886800 -1.65196900  
S 0.27703000 1.62652000 -0.10968600  
C 3.25335900 -0.98661400 -0.53747300  
O 2.36032200 0.81265900 -2.29364800  
O 1.51404000 -1.58038400 -2.44635000  
C 1.81612400 2.22516600 0.54579900  
O -0.71045400 1.52606500 0.96285500  
O -0.04910100 2.30432100 -1.36597000  
C 3.19270400 -2.29289700 -0.04127000  
C 4.27727900 -0.09803900 -0.20788900  
C 2.21697200 1.79940800 1.81624200  
C 2.57837600 3.10286500 -0.22908800  
C 4.20760200 -2.71525300 0.81308700  
H 2.36607300 -2.94353400 -0.30771900  
C 5.28254700 -0.54164500 0.65124800  
H 4.28660000 0.90783300 -0.60916600  
C 3.43012900 2.26900300 2.31558600  
H 1.60304900 1.11049300 2.38168600  
C 3.78559800 3.56704200 0.29262800  
H 2.23470200 3.39727100 -1.21273500  
C 5.24630800 -1.84259700 1.15904500  
H 4.18586400 -3.72370100 1.21305300  
H 6.08840700 0.13204700 0.92290200  
C 4.20984100 3.14815500 1.55757600  
H 3.76722500 1.94608600 3.29487200  
H 4.39374100 4.25124900 -0.28962700  
H 6.03096100 -2.18040500 1.82903200  
H 5.15362800 3.50850800 1.95476100  
F 0.95444000 -0.72847500 0.88890100  
Cu -1.07718100 -1.39846700 -0.22799900  
C -3.50242600 1.02105900 -2.99050200  
C -4.53920500 1.44020700 -2.16647400  
C -4.57644400 1.00850700 -0.84223600  
C -3.56700500 0.16270100 -0.37659400  
C -2.51225800 0.17805500 -2.47034500  
C -3.52842200 -0.33579600 1.02759700  
C -4.54648900 -0.06503900 1.94788800  
C -4.41431300 -0.53329800 3.25237700  
H -5.19215900 -0.33510000 3.98286500  
C -3.27567000 -1.24859700 3.60960700  
C -2.29557300 -1.49881500 2.64231700  
H -3.44545700 1.33879400 -4.02568400  
H -5.31466600 2.09753400 -2.54638700  
H -3.13786400 -1.61234100 4.62175000  
N -2.56018000 -0.23301400 -1.18981200  
N -2.44377600 -1.05630800 1.38015300  
C -1.03336700 -2.24920000 2.95591900  
H -0.97089500 -3.15030000 2.33810500  
H -0.16715300 -1.63479400 2.69382800  
H -0.98174300 -2.52407000 4.01115600

C -1.34697200 -0.26103000 -3.30846200  
H -0.52878500 0.45840100 -3.19640500  
H -0.97337100 -1.23702900 -2.99417300  
H -1.61807100 -0.30034100 -4.36607600  
H -5.42717200 0.49521600 1.66296400  
H -5.37721700 1.33484600 -0.19200100  
Br -0.46884500 -3.78537500 -0.47097400

### 3-N-F-Br

E(BS1) = -2498.530511

E(BS2) = -2500.396956

ZPE = 0.425799

H = 0.462328

G = 0.353836

$\langle S^2 \rangle = 0.9584$

N 0.60488900 -1.03819800 -0.45342200  
S 1.86785100 -2.11719400 -0.10052400  
S 0.66975900 0.00980000 -1.76154500  
C 3.32167700 -1.13426700 0.22175200  
O 2.12721300 -2.95490000 -1.28009600  
O 1.44813000 -2.77042800 1.14753100  
C 1.67837700 1.41162200 -1.27559000  
O -0.71139200 0.48503300 -1.94435100  
O 1.34213400 -0.63030100 -2.90293600  
C 3.53930700 -0.66316500 1.51781300  
C 4.16459300 -0.80964100 -0.84298800  
C 1.80430700 1.77810600 0.06361600  
C 2.28327200 2.14418000 -2.30120200  
C 4.64475900 0.15419700 1.74877500  
H 2.83394600 -0.90436200 2.30300100  
C 5.26034400 0.01734700 -0.59513800  
H 3.95379300 -1.18667900 -1.83692400  
C 2.55991900 2.90913000 0.37712400  
H 1.37058300 1.16785400 0.84607100  
C 3.02301200 3.27918600 -1.97173800  
H 2.18834100 1.82149100 -3.33205500  
C 5.49890600 0.49620500 0.69584300  
H 4.83331000 0.53202400 2.74868400  
H 5.92397100 0.28826700 -1.40996000  
C 3.16088400 3.66186700 -0.63412500  
H 2.68952400 3.19036200 1.41751100  
H 3.49935500 3.85669100 -2.75772100  
H 6.35225200 1.14132800 0.88166200  
H 3.74741400 4.53958300 -0.38022800  
F 0.61800200 -0.23650200 2.16833200  
Cu -0.71155000 -0.70387700 1.07636900  
C -3.27805100 -2.85745200 -1.45384500  
C -4.14664300 -1.87494500 -1.90574900  
C -4.03116700 -0.58139500 -1.40800300  
C -3.03977100 -0.28709100 -0.47271900  
C -2.29075700 -2.53653800 -0.51541600  
C -2.86639500 1.06387700 0.10644400  
C -3.73822200 2.11271800 -0.18406200  
C -3.52147600 3.35032000 0.42043400  
H -4.18269900 4.18359400 0.20673100  
C -2.46503500 3.49346500 1.30649500  
C -1.62639600 2.39835900 1.57096300  
H -3.34483700 -3.87826100 -1.81135300  
H -4.91294100 -2.11042800 -2.63651700  
H -2.27828100 4.43621400 1.80925000  
N -2.19598900 -1.26994500 -0.06392700

N -1.82555100 1.21999600 0.95679000  
C -0.50340600 2.53686600 2.56009100  
H -0.03339500 1.57569100 2.75490700  
H 0.25140900 3.22900000 2.17190200  
H -0.88371400 2.96141700 3.49445500  
C -1.33657000 -3.58768100 -0.03787900  
H -0.49597500 -3.66122300 -0.73422200  
H -0.93410200 -3.36477600 0.94900400  
H -1.83790600 -4.55729300 -0.00667700  
Br -2.14830100 -1.52001500 3.01310100  
H -4.70253500 0.19215900 -1.75355600  
H -4.57474500 1.98344700 -0.85745100

### TS-N-F-Br'

E(BS1) = -2498.484198

E(BS2) = -2500.342233

ZPE = 0.424661

H = 0.460607

G = 0.358513

312.6440i

N 0.54448500 0.13882800 -0.85342000  
S 2.04480500 -0.34172800 -1.73512800  
S 0.36092800 1.78538400 -0.24278200  
C 3.21062600 -0.95761500 -0.54758800  
O 2.52658800 0.91423300 -2.31714400  
O 1.58590400 -1.43523300 -2.58343900  
C 1.87726800 2.28357900 0.53404700  
O -0.70160000 1.68978300 0.75778400  
O 0.15103000 2.53199700 -1.48590800  
C 3.05891000 -2.26962200 -0.08631600  
C 4.25024600 -0.12420500 -0.13265300  
C 2.15719500 1.82095200 1.82385000  
C 2.74078800 3.13042800 -0.16611500  
C 3.99568700 -2.75568500 0.82151300  
H 2.22108900 -2.87444800 -0.41801400  
C 5.17557800 -0.63109300 0.77910700  
H 4.33254400 0.88660500 -0.51165100  
C 3.35146000 2.21880400 2.42116300  
H 1.46596500 1.15992600 2.33012800  
C 3.92747100 3.52178500 0.45286800  
H 2.48907900 3.45711100 -1.16712500  
C 5.04712200 -1.93886800 1.25414200  
H 3.90250800 -3.76990700 1.19574200  
H 5.99205400 -0.00169300 1.11703700  
C 4.23170900 3.06454100 1.73896700  
H 3.59481200 1.86668000 3.41796600  
H 4.61307000 4.17998900 -0.07027500  
H 5.77000500 -2.32553000 1.96592500  
H 5.16006500 3.36895300 2.21197000  
F 0.88168200 -0.62237100 0.78680200  
Cu -0.93499200 -1.13809600 -0.19774500  
C -3.70202600 0.77586200 -3.03874100  
C -4.76883700 1.10990500 -2.21332200  
C -4.72197900 0.76918600 -0.86297100  
C -3.59411700 0.10695800 -0.37222100  
C -2.59733700 0.10678500 -2.49553300  
C -3.46091300 -0.30658300 1.05203400  
C -4.41690500 0.00594200 2.02355200  
C -4.20921700 -0.42370400 3.33174300  
H -4.93708300 -0.19061900 4.10229400  
C -3.06271500 -1.14938400 3.64078100



C -2.13905000 -1.43019600 2.62764000  
H -3.71121100 1.02300300 -4.09455300  
H -5.63583600 1.62470000 -2.61458000  
H -2.87277200 -1.49236200 4.65172500  
N -2.56221600 -0.20636200 -1.18801000  
N -2.35391400 -1.01077900 1.36740900  
C -0.86842000 -2.18898600 2.88319200  
H -0.80889100 -3.05097300 2.21123200  
H -0.00617000 -1.55674800 2.64963400  
H -0.80276900 -2.52288000 3.92033200  
C -1.40932500 -0.25938500 -3.33790500  
H -0.64022400 0.51510100 -3.24856100  
H -0.96492300 -1.19923600 -3.00441200  
H -1.68939100 -0.34059100 -4.39054200  
H -5.30319200 0.57555400 1.77645900  
H -5.55594500 1.00900500 -0.21650800  
Br -0.55028500 -3.59108000 -0.71922000

### 3-N-F-Br'

E(BS1) = -2498.514173

E(BS2) = -2500.387601

ZPE = 0.427362

H = 0.462976

G = 0.360368

N 0.58857700 -1.02550000 -0.43730600  
S 1.85125500 -2.11140600 -0.07515300  
S 0.65831400 0.01434400 -1.75679100  
C 3.31041900 -1.13604500 0.24241700  
O 2.10247800 -2.95159000 -1.25383300  
O 1.42775700 -2.75673400 1.17476400  
C 1.69138800 1.40237500 -1.28815000  
O -0.71658500 0.50354500 -1.94009600  
O 1.31817100 -0.65180300 -2.89002400  
C 3.53401200 -0.66664900 1.53797600  
C 4.15475200 -0.82079200 -0.82403100  
C 1.83311700 1.77191700 0.04813500  
C 2.30494000 2.11596100 -2.32193900  
C 4.64811800 0.13933200 1.76697400  
H 2.82803400 -0.90157800 2.32456900  
C 5.25905100 -0.00488300 -0.57797000  
H 3.93917200 -1.19664000 -1.81741100  
C 2.61586200 2.88709500 0.35145300  
H 1.38817000 1.17501200 0.83458400  
C 3.07115600 3.23609200 -2.00254500  
H 2.19673900 1.79018100 -3.35049800  
C 5.50431200 0.47175300 0.71258300  
H 4.84213200 0.51535700 2.76646600  
H 5.92411600 0.25904100 -1.39384700  
C 3.22662900 3.62129000 -0.66756800  
H 2.75828600 3.17038600 1.38955600  
H 3.55466600 3.79954400 -2.79428800  
H 6.36456800 1.10799800 0.89695900  
H 3.83446800 4.48666800 -0.42168000  
F 0.60989200 -0.22114600 2.15973700  
Cu -0.71450500 -0.71027200 1.08183000  
C -3.22097800 -2.82798500 -1.50690900  
C -4.07417100 -1.84103700 -1.97738800  
C -3.98050900 -0.55581400 -1.45585600  
C -3.02515100 -0.27018400 -0.48087000  
C -2.26230300 -2.51748800 -0.53601100  
C -2.89744500 1.07076200 0.13128200

C -3.85490700 2.06603100 -0.06906800  
C -3.68096600 3.29615600 0.56350600  
H -4.40872200 4.08853900 0.42280100  
C -2.58080100 3.48242400 1.38712000  
C -1.66127200 2.43557700 1.56353000  
H -3.27455200 -3.84505400 -1.87696100  
H -4.81117000 -2.06707300 -2.74053900  
H -2.42461700 4.42014200 1.90936500  
N -2.18335500 -1.25524200 -0.06813900  
N -1.82174500 1.26462900 0.92580800  
C -0.48167000 2.61224700 2.47806500  
H -0.03010100 1.65113600 2.71601400  
H 0.27321700 3.24173900 1.99443300  
H -0.78986600 3.11941600 3.39690100  
C -1.32818200 -3.57861500 -0.04122200  
H -0.47683600 -3.66401400 -0.72275200  
H -0.94264000 -3.36046500 0.95326300  
H -1.84308500 -4.54144200 -0.01967700  
Br -2.12029100 -1.47331200 2.99289800  
H -4.63542800 0.22462300 -1.81747700  
H -4.72848000 1.89628800 -0.68425800

### 4-F-Br

E(BS1) = -2498.528960

E(BS2) = -2500.396659

ZPE = 0.425441

H = 0.462058

G = 0.355642

$\langle S^2 \rangle = 2.0088$

Cu -1.33068600 0.39148600 0.55417100  
N -2.72777300 -0.21970700 -0.90289800  
C -2.62076500 -1.26235300 -1.74677400  
C -3.47362500 -1.35786700 -2.85465000  
C -4.43582900 -0.37791700 -3.06633600  
C -4.56208700 0.66838900 -2.15472800  
C -3.68830500 0.71445400 -1.06796200  
N -2.81782400 1.70012700 0.96383000  
C -2.82482100 2.58642600 1.98370200  
C -3.81240600 3.57705900 2.04638600  
C -4.78420400 3.64809400 1.05667600  
C -4.76405500 2.72495900 0.01535600  
C -3.76305400 1.75358100 -0.01018700  
C -1.77201700 2.48445200 3.04775100  
C -1.58650500 -2.30613400 -1.44900000  
Br -1.21531900 -1.04004400 2.68816800  
F 0.18744300 -0.36291900 -0.20391900  
N 1.42694700 1.18526500 -1.47705800  
S 1.32944900 2.34297000 -0.21352100  
S 0.20462600 1.22200900 -2.71455900  
H -3.37158800 -2.19622600 -3.53426300  
H -5.32311400 1.42379000 -2.29926200  
H -5.51915400 2.76273800 -0.75798500  
H -3.80390500 4.28020500 2.87097300  
H -5.09577400 -0.43154500 -3.92612000  
H -5.55394400 4.41193500 1.09354800  
H -1.89532200 1.55407200 3.60793400  
H -0.77607700 2.46057300 2.60219800  
H -1.83818200 3.33093800 3.73350300  
H -0.59490300 -1.85426600 -1.48331000  
H -1.72929200 -2.68507300 -0.43160300  
H -1.65321600 -3.13461700 -2.15615300

C 1.05803800 2.27878200 -3.86629800  
O 0.16029700 -0.14109300 -3.24520800  
O -1.02705900 1.88580400 -2.26840800  
C 2.58421300 1.74298200 0.89674500  
O 1.74264500 3.62840400 -0.79696100  
O 0.01460900 2.30172100 0.46875600  
C 1.95639700 1.70079000 -4.76996000  
C 2.62281200 2.53320100 -5.66692000  
C 2.39118800 3.91251900 -5.64630600  
C 0.81637800 3.65605100 -3.82754800  
C 1.49116400 4.47183900 -4.73229200  
H 2.11386300 0.62824500 -4.77200000  
H 3.31991400 2.10683000 -6.38066900  
H 2.91509200 4.55589400 -6.34635000  
H 0.12099800 4.06796400 -3.10638700  
H 1.31575800 5.54253300 -4.72508300  
C 3.71611700 2.53799200 1.09011100  
C 4.67624500 2.10939700 2.00734500  
C 4.49418600 0.91146000 2.70337900  
C 2.38015300 0.53816000 1.57811500  
C 3.35485200 0.12945900 2.48663600  
H 3.83436400 3.46473000 0.54070500  
H 5.56253300 2.71203600 2.17713300  
H 5.24487400 0.58401900 3.41615900  
H 1.50487200 -0.06577400 1.37008700  
H 3.22092500 -0.80283700 3.02572900

#### 5-N-F-Br

E(BS1) = -2498.539043

E(BS2) = -2500.408980

ZPE = 0.427426

H = 0.463237

G = 0.359776

$\langle S^2 \rangle = 2.0055$

N -0.69019500 -0.91039300 -0.61484500  
S -1.93821400 -1.23467800 -1.68053000  
S -0.72746800 -1.33863500 0.98777100  
C -3.36672600 -0.33600100 -1.09284600  
O -2.27037200 -2.66839400 -1.68310300  
O -1.49131400 -0.61465300 -2.94174200  
C -1.74080500 -0.11925600 1.83211800  
O 0.66209200 -1.13485900 1.44828700  
O -1.34907000 -2.65577100 1.20058500  
C -3.40320600 1.04788700 -1.28164600  
C -4.38134700 -1.02388800 -0.42678700  
C -1.67746000 1.22549400 1.45669800  
C -2.50968900 -0.54484900 2.91727900  
C -4.50358200 1.75358900 -0.79841900  
H -2.55881500 1.54834000 -1.74210900  
C -5.47232600 -0.30003700 0.05755600  
H -4.31076900 -2.09729200 -0.29407100  
C -2.39860000 2.15916000 2.20130800  
H -1.13503900 1.52891100 0.56685200  
C -3.22475500 0.40246800 3.65111300  
H -2.55113000 -1.59806800 3.17102300  
C -5.53417600 1.08284800 -0.13175700  
H -4.55063600 2.83023200 -0.92942200  
H -6.27101200 -0.81641400 0.58067400  
C -3.16461900 1.75281600 3.29741700  
H -2.37398000 3.20521000 1.91136500  
H -3.83027200 0.08423100 4.49406300

H -6.38481400 1.64120200 0.24750200  
H -3.72478900 2.48703800 3.86864800  
F -0.38613000 1.80006700 -1.37865200  
Cu 0.76471000 0.40757300 -1.19382500  
C 3.35799700 -2.97988900 -1.76249000  
C 4.33712500 -2.75791500 -0.80446900  
C 4.26112100 -1.61768600 -0.00524100  
C 3.19370100 -0.74422200 -0.18917400  
C 2.30886100 -2.06244200 -1.91554000  
C 3.04118100 0.48650100 0.61578400  
C 3.55628600 0.61126100 1.90398300  
C 3.33182200 1.79580900 2.60375600  
H 3.71709500 1.91203100 3.61130200  
C 2.60962500 2.82235800 2.00642100  
C 2.11674500 2.66311600 0.70420400  
H 3.39270000 -3.85289100 -2.40405800  
H 5.16004300 -3.45465000 -0.68496000  
H 2.42583000 3.75496500 2.52729000  
N 2.24612300 -0.97094500 -1.13023900  
N 2.32167100 1.49225100 0.06593300  
C 1.39269100 3.76050100 -0.01224700  
H 2.08473000 4.26554200 -0.69504900  
H 0.58152100 3.33456600 -0.60693900  
H 1.00982700 4.49547600 0.69841100  
C 1.23016600 -2.28865200 -2.93110300  
H 0.40543100 -2.84772500 -2.47755800  
H 0.81425000 -1.35106800 -3.30097400  
H 1.61330000 -2.86840200 -3.77351300  
H 4.08203700 -0.21545300 2.36438100  
H 5.02947800 -1.40165000 0.72612200  
Br 2.83776700 1.89711700 -2.61544300

#### D1-N-F-2Br

E(BS1) = -3282.129022

E(BS2) = -3285.543477

ZPE = 0.645396

H = 0.698531

G = 0.557690

$\langle S^2 \rangle = 2.0059$

N -0.65788600 0.22818900 -1.19454700  
S -0.50329100 1.22207000 0.15382600  
S 0.21775200 0.54988400 -2.58295500  
C -1.31452200 2.74383500 -0.33997500  
O 0.89215800 1.55223300 0.47939600  
O -1.31786000 0.58281800 1.19750700  
C -0.71058000 1.80247500 -3.46430400  
O 0.08908100 -0.72120800 -3.33359500  
O 1.56418000 1.08730200 -2.34177600  
C -2.58873000 2.68776900 -0.91109800  
C -0.66918900 3.95841600 -0.10881600  
C -1.91245300 1.44432500 -4.07647500  
C -0.23975800 3.11526600 -3.48442800  
C -3.22373800 3.87685200 -1.25915300  
H -3.05503800 1.73104900 -1.10822300  
C -1.31944600 5.14448800 -0.45613900  
H 0.32529300 3.96589800 0.32213800  
C -2.65986600 2.42629500 -4.72263200  
H -2.25114200 0.41841900 -4.05167500  
C -0.99970400 4.09085800 -4.13125600  
H 0.69522900 3.36263700 -2.99611800  
C -2.59168500 5.10362200 -1.02948100

H -4.20554300 3.84630500 -1.72065200  
H -0.82734500 6.09682400 -0.28548100  
C -2.20597700 3.74860000 -4.74690500  
H -3.59526500 2.15765800 -5.20370400  
H -0.65051000 5.11814800 -4.14744900  
H -3.08987400 6.02748800 -1.30719700  
H -2.79400700 4.51323900 -5.24525900  
Cu -0.99053300 -1.81214900 -1.13587700  
C -3.95474500 -1.55844900 -4.44230100  
C -4.92468500 -0.75152100 -3.86260400  
C -4.84209600 -0.46766000 -2.50112000  
C -3.76108100 -0.96388500 -1.76838400  
C -2.87370500 -2.00699300 -3.66791800  
C -3.71567100 -0.88320000 -0.28196300  
C -4.60654000 -0.10031300 0.45736200  
C -4.59921500 -0.21682500 1.84580200  
H -5.28558200 0.37278500 2.44525300  
C -3.71644000 -1.10398800 2.44864300  
C -2.81413600 -1.81555700 1.64773600  
H -4.01480500 -1.84745200 -5.48556400  
H -5.75814600 -0.37897900 -4.44926200  
H -3.70224600 -1.23585400 3.52502600  
N -2.76725800 -1.65904400 -2.37036800  
N -2.81804000 -1.69195100 0.31273300  
C -1.77955800 -2.72626000 2.23487100  
H -1.65755300 -3.60855800 1.60372000  
H -0.81668700 -2.20590400 2.26154800  
H -2.03885800 -3.03653300 3.24967100  
C -1.82091100 -2.89088300 -4.26384000  
H -1.01264900 -2.28549400 -4.68022900  
H -1.39968400 -3.52803900 -3.48857700  
H -2.24632000 -3.50373700 -5.06219000  
H -5.29713300 0.57970100 -0.02543800  
H -5.63188000 0.08946100 -2.01481700  
F -0.78284500 -3.71420900 -1.44181000  
Cu 0.73333600 -4.63160700 -0.66657500  
C 3.79241300 -4.50997300 -4.03215000  
C 4.88037800 -5.12084000 -3.41810900  
C 4.76219700 -5.56401200 -2.10304300  
C 3.54410100 -5.37945600 -1.44130400  
C 2.59961800 -4.35828000 -3.31423400  
C 3.33257800 -5.78789700 -0.02896400  
C 4.30216400 -6.46552700 0.71494000  
C 4.04129800 -6.78339000 2.04406400  
H 4.78357300 -7.31188200 2.63311300  
C 2.82619700 -6.41145300 2.60870100  
C 1.88344400 -5.74229000 1.82428800  
H 3.85520300 -4.14892200 -5.05258200  
H 5.81605500 -5.24773800 -3.95301600  
H 2.59702600 -6.63228800 3.64466900  
N 2.49409200 -4.79043700 -2.04673200  
N 2.14692300 -5.45743500 0.53277700  
C 0.56562200 -5.28834400 2.37214800  
H 0.51280200 -4.19794500 2.31559000  
H -0.25363800 -5.69566500 1.77096500  
H 0.43464300 -5.59767100 3.41008600  
C 1.38018900 -3.72250600 -3.90582700  
H 0.99843000 -2.94255800 -3.24426700  
H 1.58539500 -3.28542900 -4.88492400  
H 0.59214200 -4.47337600 -4.01630200  
H 5.24648700 -6.74512700 0.26784200

H 5.60705500 -6.02909200 -1.61237800  
Br 1.27831800 -2.16583700 0.13326400  
Br -0.41413000 -6.89629700 -0.93763400

#### 6-N-F

E(BS1) = -2485.389452  
E(BS2) = -2487.051767  
ZPE = 0.426675  
H = 0.460161  
G = 0.364525  
<S<sup>2</sup>> = 0.7523  
N -0.17342700 -0.23594400 -2.07687500  
S 1.18078800 -0.27435500 -1.15218800  
S -0.26124800 0.65818700 -3.48567500  
C 1.24104400 1.24964200 -0.22536400  
O 2.45718700 -0.44900200 -1.85192300  
O 0.75836100 -1.38168400 -0.21624500  
C -1.81908700 1.52256200 -3.30675600  
O -0.39227000 -0.25381300 -4.63353000  
O 0.82272800 1.65668800 -3.48424500  
C 0.05380400 1.76499000 0.30212900  
C 2.47217400 1.86902400 -0.01357000  
C -2.90363300 1.14775400 -4.09792300  
C -1.89444400 2.59692900 -2.41516700  
C 0.10656500 2.93089100 1.06265100  
H -0.89168000 1.27876100 0.09700200  
C 2.51031800 3.03647200 0.75160500  
H 3.37228800 1.44878600 -0.44702600  
C -4.09906400 1.86031400 -3.98136300  
H -2.81016100 0.31351600 -4.78335600  
C -3.09597400 3.29214900 -2.30055200  
H -1.02679900 2.88899000 -1.83558600  
C 1.33368200 3.56372100 1.28903200  
H -0.80919300 3.34493600 1.47270100  
H 3.45942900 3.53378500 0.92313600  
C -4.19638600 2.92473200 -3.08319800  
H -4.95212900 1.57735900 -4.58952800  
H -3.17161100 4.12414900 -1.60778800  
H 1.37061600 4.47265900 1.88135400  
H -5.12922200 3.47284000 -2.99366200  
Cu -1.11380000 -1.88028700 -1.28090900  
C -3.60817100 -2.79683700 -4.64835300  
C -4.80962200 -2.16413900 -4.33987300  
C -4.92180300 -1.43511700 -3.15830500  
C -3.81047100 -1.33802400 -2.31660900  
C -2.53702000 -2.69898300 -3.75461700  
C -3.82682100 -0.55581000 -1.04862400  
C -4.81188000 0.39746100 -0.77716400  
C -4.76549700 1.07423100 0.44027000  
H -5.50631100 1.83353400 0.66911200  
C -3.76481400 0.76564900 1.35542200  
C -2.80613400 -0.20140200 1.02001100  
H -3.49518000 -3.37368300 -5.55896800  
H -5.65874800 -2.24397600 -5.01085000  
H -3.71456000 1.26228300 2.31828900  
N -2.66181800 -1.97071300 -2.62935100  
N -2.83361400 -0.81643900 -0.17402000  
C -1.73125400 -0.62059500 1.98562300  
H -1.50259800 0.17532900 2.69818300  
H -2.07039800 -1.49555100 2.55258300  
H -0.82074800 -0.90237600 1.45391100

C -1.21818600 -3.38113700 -3.96853000  
 H -0.43404400 -2.62241500 -4.06176800  
 H -0.99375400 -3.99776300 -3.09193700  
 H -1.22592000 -3.99939900 -4.86758400  
 H -5.57574700 0.63645500 -1.50486800  
 H -5.85771200 -0.95928700 -2.89626100  
 F -1.20666800 -3.60611600 -0.75849900

**7-2Br**

E(BS1) = -796.700807  
 E(BS2) = -798.466122  
 ZPE = 0.217203  
 H = 0.236210  
 G = 0.169346  
 $\langle S^2 \rangle = 0.7531$   
 Cu -1.68457100 -0.00703400 1.02822600  
 N -2.60558700 -0.17792600 -0.81493700  
 C -2.34046700 -1.11407500 -1.74761800  
 C -3.11935600 -1.19222300 -2.90880300  
 C -4.17812500 -0.30934800 -3.08488800  
 C -4.45591800 0.63363000 -2.09785400  
 C -3.64667500 0.67779400 -0.96238000  
 N -3.06104100 1.49199600 1.22860300  
 C -3.12910600 2.34571600 2.26940800  
 C -4.07762500 3.37534200 2.27081600  
 C -4.93449200 3.51971900 1.18590100  
 C -4.82476400 2.64937200 0.10358400  
 C -3.86738200 1.63569700 0.14923700  
 C -2.15722400 2.16487300 3.39869400  
 C -1.20351600 -2.06098800 -1.49641600  
 H -2.89078700 -1.94611500 -3.65315700  
 H -5.29457100 1.30741100 -2.21293700  
 H -5.46499200 2.77383900 -0.75946500  
 H -4.12548900 4.05302000 3.11521200  
 H -4.79333200 -0.35915500 -3.97713000  
 H -5.67393100 4.31353000 1.17161100  
 H -2.39158000 1.25619400 3.95988300  
 H -1.14059400 2.04761000 3.01034400  
 H -2.18262600 3.02107600 4.07473500  
 H -0.25030500 -1.52654200 -1.52892200  
 H -1.28770900 -2.50074200 -0.49794300  
 H -1.19254400 -2.86201600 -2.23717100  
 Br -1.99624100 -1.45105300 3.01683600  
 Br 0.75535100 0.05502200 0.70008400

**NBrSI**

E(BS1) = -1628.343076  
 E(BS2) = -1628.837988  
 ZPE = 0.207222  
 H = 0.226679  
 G = 0.160255  
 S -1.32152100 1.51883200 -0.08774500  
 O -1.65485100 2.37634900 -1.22203300  
 O -1.07240900 2.08031200 1.23597800  
 N 0.24061400 0.76402800 -0.53982000  
 S 0.80155300 -0.64136900 0.39884600  
 O 0.33511800 -1.88744200 -0.21056100  
 O 0.44243500 -0.31415100 1.77961000  
 C 2.55282100 -0.46484800 0.15253000  
 C 3.22557500 -1.41089600 -0.62189900  
 C 3.20298700 0.61286500 0.76080900

C 4.60350100 -1.26818000 -0.78836200  
 H 2.68147800 -2.23071700 -1.07606900  
 C 4.57810400 0.74031400 0.57976900  
 H 2.64504200 1.32912200 1.35373300  
 C 5.27394000 -0.19728300 -0.19178600  
 H 5.14980100 -1.99189600 -1.38410700  
 H 5.10622400 1.56888100 1.03982100  
 H 6.34557300 -0.09079600 -0.32819300  
 C -2.48348600 0.17727000 0.01316800  
 C -2.68982300 -0.44751100 1.24595200  
 C -3.12143500 -0.23984000 -1.15891000  
 C -3.57026900 -1.52710300 1.29844300  
 H -2.16547800 -0.10023300 2.12738100  
 C -3.99584000 -1.32284900 -1.08452700  
 H -2.94387400 0.27664500 -2.09491300  
 C -4.21691300 -1.96353900 0.13848700  
 H -3.74984900 -2.02616200 2.24494300  
 H -4.50504600 -1.66364600 -1.97993300  
 H -4.89882000 -2.80670500 0.18788500  
 Br 0.44938800 0.45099700 -2.47972700

**D2-N-2F-Br**

E(BS1) = -3368.760947  
 E(BS2) = -3372.010635  
 ZPE = 0.646513  
 H = 0.698847  
 G = 0.561155  
 $\langle S^2 \rangle = 2.0051$   
 N -0.56670300 0.16683000 -1.35953700  
 S -0.31800200 1.18189600 -0.04406700  
 S 0.23733300 0.43979500 -2.80061900  
 C -1.22759900 2.67504200 -0.45765500  
 O 1.09008900 1.56945700 0.13326900  
 O -0.99926100 0.52736300 1.08292100  
 C -0.67723200 1.74341800 -3.61753700  
 O -0.00328800 -0.82077400 -3.53968700  
 O 1.62289500 0.90286300 -2.64605700  
 C -2.49999500 2.58274200 -1.02638100  
 C -0.65362700 3.90951700 -0.15170400  
 C -1.89476700 1.43646600 -4.22627900  
 C -0.18809100 3.04936800 -3.56969300  
 C -3.20692100 3.75226300 -1.29413700  
 H -2.90821700 1.61724300 -1.29228100  
 C -1.37491500 5.07490100 -0.41811000  
 H 0.34283400 3.95003800 0.27304100  
 C -2.64044700 2.46539700 -4.79799800  
 H -2.24666100 0.41421900 -4.25484300  
 C -0.94660500 4.07146300 -4.14130100  
 H 0.75930600 3.25468000 -3.08531700  
 C -2.64796500 4.99680800 -0.98657600  
 H -4.18751800 3.69206700 -1.75548000  
 H -0.93780100 6.04146400 -0.18786300  
 C -2.16976900 3.78107600 -4.75083100  
 H -3.58875900 2.23860200 -5.27538800  
 H -0.58427100 5.09358100 -4.10314600  
 H -3.20197500 5.90572200 -1.20073200  
 H -2.75769100 4.58152400 -5.18950400  
 Cu -0.97547600 -1.85408200 -1.22148100  
 C -4.05038700 -1.51209500 -4.42738400  
 C -4.96090800 -0.65658600 -3.82088100  
 C -4.82243900 -0.37152200 -2.46357300

C -3.74160200 -0.91479000 -1.76471500  
C -2.96752900 -2.00852700 -3.68490900  
C -3.63277700 -0.82868900 -0.28008300  
C -4.48367600 -0.04030200 0.49907900  
C -4.40864000 -0.15397500 1.88664500  
H -5.06405700 0.43900900 2.51668700  
C -3.50043900 -1.04198900 2.45024200  
C -2.64037100 -1.75926400 1.60862700  
H -4.15959000 -1.80333100 -5.46622600  
H -5.79351800 -0.24624500 -4.38305000  
H -3.43498800 -1.17014700 3.52527200  
N -2.80178600 -1.65635000 -2.39624600  
N -2.71229100 -1.63747500 0.27662400  
C -1.57683000 -2.67059000 2.14242900  
H -1.41003600 -3.49317800 1.44439500  
H -0.63494900 -2.11850600 2.22222900  
H -1.83924500 -3.06783500 3.12603300  
C -1.98385400 -2.95798500 -4.30217000  
H -1.18848300 -2.40542700 -4.80736000  
H -1.53252900 -3.57147900 -3.52420400  
H -2.48470500 -3.59532300 -5.03555600  
H -5.19437900 0.64102200 0.04867400  
H -5.56795300 0.22686400 -1.95647600  
F -0.92464100 -3.75727500 -1.43377000  
Cu 0.56924500 -4.72866800 -0.60774300  
C 3.77360000 -4.09609300 -3.78987400  
C 4.91964600 -4.38308700 -3.05622100  
C 4.79470000 -4.89861700 -1.76734000  
C 3.51139100 -5.11554300 -1.25695300  
C 2.51810000 -4.31768500 -3.20842600  
C 3.28031400 -5.66464500 0.10579400  
C 4.28817600 -6.30537600 0.83195200  
C 3.99929900 -6.79673400 2.10158300  
H 4.76763900 -7.30043800 2.67918000  
C 2.71574100 -6.64470300 2.61515900  
C 1.73881400 -6.00725600 1.84367300  
H 3.83796500 -3.69256800 -4.79439000  
H 5.90348100 -4.20287000 -3.47759200  
H 2.45839100 -7.01808000 3.59980100  
N 2.40691900 -4.82197000 -1.96948400  
N 2.03674700 -5.53109700 0.61820600  
C 0.33578900 -5.80803000 2.33602000  
H 0.16447000 -4.74406500 2.52587600  
H -0.36181800 -6.13243500 1.55840400  
H 0.15467900 -6.35849600 3.26080600  
C 1.23972500 -3.96330700 -3.90503600  
H 0.87251800 -3.00400700 -3.52798600  
H 1.37775300 -3.87429100 -4.98503000  
H 0.47467600 -4.71355100 -3.69501100  
H 5.27426800 -6.43933400 0.40675600  
H 5.67742700 -5.10365200 -1.17507100  
Br 1.32343400 -2.25665600 -0.04476600  
F -0.37170500 -6.30091700 -0.61277800

#### 8-F-Br

E(BS1) = -883.338351  
E(BS2) = -884.936333  
ZPE = 0.218841  
H = 0.236965  
G = 0.174089  
<S<sup>2</sup>> = 0.7532

Cu -1.67089300 0.04874300 1.12189100  
N -2.56623100 -0.14709400 -0.81122400  
C -2.27872800 -1.05943000 -1.75688100  
C -3.10230300 -1.19271100 -2.88629000  
C -4.22785500 -0.39177000 -3.01367700  
C -4.51867400 0.54273700 -2.01929400  
C -3.65970600 0.64722100 -0.92677100  
N -3.01548700 1.54053300 1.21814500  
C -3.06983300 2.42008500 2.23984200  
C -4.04504100 3.42140900 2.25341400  
C -4.94823700 3.50944800 1.19904300  
C -4.85724400 2.61161700 0.13820600  
C -3.86847800 1.62690500 0.16957300  
C -2.04478400 2.28434800 3.32749900  
C -1.07908400 -1.94535000 -1.57078100  
F -0.01524200 -0.60302400 0.95575400  
H -2.84897100 -1.92749700 -3.64252900  
H -5.40079900 1.16411000 -2.10096000  
H -5.53620300 2.69271900 -0.70007500  
H -4.08005700 4.12051000 3.08072000  
H -4.87990000 -0.48886000 -3.87552200  
H -5.71088600 4.28117200 1.19285200  
H -2.15519000 1.31769700 3.82767100  
H -1.03574700 2.31764400 2.90183700  
H -2.13980500 3.08570900 4.06173900  
H -0.43375400 -1.56811100 -0.77645000  
H -1.41147300 -2.95448900 -1.29919700  
H -0.51988600 -2.02978900 -2.50725300  
Br -2.54322500 -1.38592800 3.03590800

#### D3-N-3F

E(BS1) = -3455.423174  
E(BS2) = -3458.498958  
ZPE = 0.648245  
H = 0.699454  
G = 0.566775  
<S<sup>2</sup>> = 2.0039  
N -0.24440900 -0.40214900 -1.46228100  
S 0.42348200 0.29803800 -0.08688500  
S 0.32362700 0.05435600 -2.96050500  
C 0.06930200 2.04707900 -0.26804100  
O 1.88349600 0.14259600 0.00614200  
O -0.39750100 -0.19291500 1.03082300  
C -0.71169800 1.43169200 -3.47490600  
O 0.00251400 -1.08306000 -3.84675100  
O 1.70670000 0.55842900 -2.93035000  
C -1.26667700 2.45823700 -0.25955900  
C 1.11701100 2.95683400 -0.39544300  
C -2.05395500 1.19731200 -3.77813800  
C -0.16170100 2.71045100 -3.55100100  
C -1.55270700 3.81514500 -0.38627700  
H -2.05991900 1.72547300 -0.16119300  
C 0.81712500 4.31615100 -0.51604900  
H 2.13905200 2.59678200 -0.40816100  
C -2.86498500 2.27011900 -4.14223600  
H -2.44964200 0.19318300 -3.74382000  
C -0.98293700 3.77862400 -3.91568500  
H 0.88269000 2.86310900 -3.31054100  
C -0.51240200 4.74259500 -0.51277900  
H -2.58514000 4.15039800 -0.39014000  
H 1.62179300 5.03781900 -0.61680300

C -2.33142200 3.56170800 -4.20571600  
H -3.91014600 2.09537800 -4.37875000  
H -0.56760400 4.78016100 -3.96383400  
H -0.74111700 5.79931600 -0.61286200  
H -2.96675900 4.39693500 -4.48468800  
Cu -1.05670900 -2.34416800 -1.27760900  
C -4.11176000 -1.90085900 -4.34391200  
C -5.00413900 -1.03876600 -3.71851300  
C -4.79682400 -0.70131200 -2.38332500  
C -3.67250300 -1.20197500 -1.72533400  
C -2.99397100 -2.37684500 -3.64474800  
C -3.47546700 -1.01909600 -0.26387400  
C -4.13073200 -0.03285800 0.47822300  
C -3.97674300 -0.04352800 1.86447800  
H -4.47366800 0.70592600 2.47237900  
C -3.18626300 -1.02187100 2.45831300  
C -2.51653600 -1.94598000 1.64578100  
H -4.26873000 -2.22018900 -5.36766600  
H -5.87035100 -0.65980800 -4.25097200  
H -3.06203700 -1.06105900 3.53485700  
N -2.76754000 -1.97924500 -2.37280100  
N -2.66843500 -1.92791900 0.31320900  
C -1.58948600 -2.99068700 2.19284000  
H -1.98181700 -3.98898500 1.96874700  
H -0.62570900 -2.89454100 1.68746900  
H -1.46109500 -2.89549700 3.27301200  
C -2.04009000 -3.34338600 -4.27619600  
H -1.10786000 -2.83119300 -4.51684000  
H -1.80432300 -4.13693600 -3.56564800  
H -2.46578100 -3.76652200 -5.18788400  
H -4.73793800 0.72398600 -0.00343200  
H -5.51831000 -0.09400600 -1.85245600  
F 0.38305500 -6.53308500 -0.60607200  
F -1.03189100 -4.29254500 -1.56726500  
Cu 0.55760600 -4.72867600 -0.46645700  
C 3.25660400 -2.35422400 -3.15045000  
C 4.10561600 -1.83378000 -2.17993300  
C 4.12148100 -2.40106100 -0.90739800  
C 3.27111400 -3.47945100 -0.65222200  
C 2.42979800 -3.43596800 -2.82289700  
C 3.19390200 -4.12871000 0.68548600  
C 4.25919800 -4.09235000 1.58902200  
C 4.12517200 -4.73691700 2.81615000  
H 4.94208500 -4.72515400 3.53069100  
C 2.94224700 -5.40796000 3.10933500  
C 1.90857200 -5.42102600 2.16643000  
H 3.20399300 -1.91493600 -4.13944300  
H 4.73074100 -0.97516300 -2.40172900  
H 2.81026200 -5.92370200 4.05386600  
N 2.44874200 -3.97565200 -1.59473700  
N 2.05142000 -4.78489600 0.98741000  
C 0.60184400 -6.11766500 2.41976000  
H -0.17675200 -5.37740200 2.63366000  
H 0.30472700 -6.66082400 1.51844700  
H 0.67246600 -6.79614700 3.27215600  
C 1.47736100 -4.05160300 -3.80870300  
H 0.53741000 -4.28713100 -3.30548100  
H 1.27809100 -3.37375700 -4.63976400  
H 1.89097300 -4.98630700 -4.20530800  
H 5.18342800 -3.59278800 1.32680000  
H 4.74441100 -1.98319400 -0.12619800

F 0.41305000 -2.79818400 -0.14355100

### 9-2F

E(BS1) = -969.970368  
E(BS2) = -971.406384  
ZPE = 0.220181  
H = 0.237393  
G = 0.178570  
<S<sup>2</sup>> = 0.7527  
Cu -1.61797100 -0.02462400 1.04575900  
N -2.61888200 -0.21187400 -0.79202600  
C -2.35824100 -1.13870600 -1.73757800  
C -3.09112600 -1.15691300 -2.93220300  
C -4.10388100 -0.22788800 -3.13089200  
C -4.38207300 0.70272700 -2.13206700  
C -3.61932900 0.68559700 -0.96351000  
N -3.02348400 1.51882000 1.22327000  
C -3.13104900 2.35994600 2.27315500  
C -4.13256200 3.33986000 2.29481300  
C -5.00386700 3.45503500 1.21943400  
C -4.85951000 2.60015300 0.12891900  
C -3.85097100 1.63572000 0.15737300  
C -2.12831500 2.24237500 3.38445700  
C -1.30082800 -2.16709200 -1.45676800  
F 0.07357400 -0.49201800 0.54175800  
H -2.85983900 -1.90136700 -3.68562100  
H -5.17727500 1.42264700 -2.27185300  
H -5.52502600 2.68994300 -0.71903000  
H -4.21151400 3.99972100 3.15135500  
H -4.67970000 -0.22717300 -4.05065700  
H -5.78673900 4.20651500 1.22162000  
H -1.86236700 1.19312200 3.53618800  
H -1.21448000 2.78056700 3.10201400  
H -2.51067300 2.69014600 4.30417800  
H -0.50038400 -1.72762400 -0.85639600  
H -1.74268700 -2.98618400 -0.87502400  
H -0.91189300 -2.58911900 -2.38604000  
F -1.55044200 -0.58570300 2.78390900

### DTSF-N-3F (Conf. A, Triplet)

E(BS1) = -5169.53189  
E(BS2) = -5169.462064  
ZPE = 0.857874  
H = 0.927700  
G = 0.752039  
<S<sup>2</sup>> = 2.5975  
266.6278i  
N -0.36742700 -0.86747100 -1.09259200  
S 0.40499700 0.05453800 0.05250500  
S -0.16336100 -0.51908700 -2.68661700  
C -0.09552200 1.74769600 -0.28431500  
O 1.87636100 0.01301700 -0.03668800  
O -0.21287100 -0.32150400 1.33888800  
C -1.43786800 0.69422900 -3.07072000  
O -0.53918500 -1.75349500 -3.40884100  
O 1.13359700 0.10600700 -3.01440400  
C -1.42032300 2.11430600 -0.03249600  
C 0.82504400 2.65086100 -0.81288500  
C -2.76922800 0.38011700 -2.78928100  
C -1.08734200 1.91278400 -3.64680000  
C -1.82576100 3.41630000 -0.31725500



|    |             |             |             |                                   |              |              |             |
|----|-------------|-------------|-------------|-----------------------------------|--------------|--------------|-------------|
| C  | -1.09384500 | 1.93266500  | -3.60684400 | N                                 | 2.73048200   | -3.60646400  | -1.72000800 |
| C  | -1.83542400 | 3.38815100  | -0.25652200 | N                                 | 3.15526600   | -4.60542300  | 0.68672700  |
| H  | -2.10139500 | 1.34516100  | 0.40171700  | C                                 | 2.73576400   | -6.65271700  | 1.95357100  |
| C  | 0.39017700  | 3.96325800  | -1.02873500 | H                                 | 1.66043300   | -6.53787100  | 1.80865900  |
| H  | 1.83757300  | 2.34640600  | -0.98181900 | H                                 | 3.08416700   | -7.32110200  | 1.16052200  |
| C  | -3.77034700 | 1.31093200  | -3.05656200 | H                                 | 2.95956100   | -7.08516100  | 2.93028900  |
| H  | -3.01646100 | -0.57618600 | -2.33947300 | C                                 | 1.66312100   | -4.23114900  | -3.83749600 |
| C  | -2.10146700 | 2.86067700  | -3.88203900 | H                                 | 0.66108800   | -3.79804100  | -3.82998500 |
| H  | -0.05185800 | 2.15883600  | -3.79798900 | H                                 | 2.02468700   | -4.28440300  | -4.86752200 |
| C  | -0.93348500 | 4.32565700  | -0.77112800 | H                                 | 1.61755900   | -5.22740900  | -3.39975700 |
| H  | -2.86573000 | 3.67141000  | -0.06514300 | H                                 | 5.22364900   | -1.98624600  | 1.11425600  |
| H  | 1.08712200  | 4.69208100  | -1.43111000 | H                                 | 4.97206300   | -1.24958000  | -0.86122900 |
| C  | -3.43517100 | 2.55246800  | -3.60857500 | F                                 | 0.90268500   | -3.07178800  | 0.22941600  |
| H  | -4.80675300 | 1.06742100  | -2.84200300 | F                                 | 2.05600600   | -6.32490600  | -1.41774500 |
| H  | -1.83991800 | 3.82673200  | -4.30267700 | N                                 | 2.76005700   | -7.92929100  | -2.62517400 |
| H  | -1.26669600 | 5.33879300  | -0.97550200 | S                                 | 1.82490900   | -9.09957900  | -1.75416000 |
| H  | -4.21391500 | 3.27881600  | -3.82124700 | S                                 | 4.37006800   | -7.51073800  | -2.12083300 |
| Cu | -0.86345100 | -3.07002700 | -0.49855300 | C                                 | 0.18990300   | -8.60229800  | -2.26455700 |
| C  | -4.50971700 | -2.94843400 | -2.87492300 | O                                 | 2.18639800   | -10.36218500 | -2.42581700 |
| C  | -5.32721700 | -2.22303900 | -2.02310600 | O                                 | 1.94460200   | -9.01589000  | -0.29691200 |
| C  | -4.86552900 | -1.91228100 | -0.74556800 | C                                 | 5.21317300   | -8.84091000  | -2.95963500 |
| C  | -3.58517600 | -2.31651800 | -0.37091100 | O                                 | 4.65275300   | -6.24812700  | -2.80835200 |
| C  | -3.22351400 | -3.33279600 | -2.46274800 | O                                 | 4.60471600   | -7.63454100  | -0.67894900 |
| C  | -3.06298200 | -2.10978300 | 1.00197300  | C                                 | -0.34096700  | -9.18476100  | -3.41956000 |
| C  | -3.76844400 | -1.41140600 | 1.98081700  | C                                 | -0.50997700  | -7.65804100  | -1.50922700 |
| C  | -3.25715600 | -1.38240000 | 3.27707800  | C                                 | 5.48833300   | -8.70863800  | -4.32441000 |
| H  | -3.78886300 | -0.85161500 | 4.06018300  | C                                 | 5.54858200   | -9.99097800  | -2.23928900 |
| C  | -2.07595400 | -2.05396900 | 3.55568000  | C                                 | -1.62117600  | -8.81037500  | -3.82597500 |
| C  | -1.37808200 | -2.70069700 | 2.52466300  | H                                 | 0.23397000   | -9.91656700  | -3.97561000 |
| H  | -4.84585200 | -3.23093200 | -3.86616800 | C                                 | -1.78865700  | -7.29859500  | -1.93504000 |
| H  | -6.31933300 | -1.91467000 | -2.33584000 | H                                 | -0.07307500  | -7.18463200  | -0.63818000 |
| H  | -1.66896300 | -2.07194900 | 4.56035500  | C                                 | 6.12434000   | -9.76110000  | -4.98019900 |
| N  | -2.77442800 | -2.98904100 | -1.23531000 | H                                 | 5.21688700   | -7.79911800  | -4.84837200 |
| N  | -1.87821100 | -2.70311300 | 1.27426100  | C                                 | 6.18517100   | -11.03318400 | -2.91041200 |
| C  | -0.06871300 | -3.37598600 | 2.79554100  | H                                 | 5.31951600   | -10.05706000 | -1.18193200 |
| H  | 0.73836900  | -2.68754400 | 2.53153900  | C                                 | -2.34207500  | -7.86887300  | -3.08416300 |
| H  | 0.00890400  | -3.63276400 | 3.85497000  | H                                 | -2.05371900  | -9.25330100  | -4.71745900 |
| H  | 0.05630500  | -4.26159200 | 2.17088200  | H                                 | -2.34151700  | -6.55377200  | -1.37172200 |
| C  | -2.36692300 | -4.13149300 | -3.39871400 | C                                 | 6.46922000   | -10.91884900 | -4.27527700 |
| H  | -1.95414000 | -3.46756400 | -4.16214700 | H                                 | 6.35140300   | -9.67791200  | -6.03807100 |
| H  | -1.53592300 | -4.60056600 | -2.88011600 | H                                 | 6.45976600   | -11.93291700 | -2.36952000 |
| H  | -2.97799600 | -4.89160700 | -3.89323600 | H                                 | -3.33733400  | -7.57750800  | -3.40698500 |
| H  | -4.69913400 | -0.90931400 | 1.75307400  | H                                 | 6.96315900   | -11.73598300 | -4.79196000 |
| H  | -5.50414500 | -1.38013500 | -0.05390500 |                                   |              |              |             |
| F  | 0.32567300  | -5.66424700 | 0.64009100  | <b>D4-N-4F (Conf. A, Quintet)</b> |              |              |             |
| F  | -0.05987700 | -4.45166900 | -1.65054800 | E(BS1) =                          | -5170.386485 |              |             |
| Cu | 1.51160600  | -4.78439200 | -0.53830500 | E(BS2) =                          | -5173.782032 |              |             |
| C  | 3.26951100  | -2.28456900 | -3.60322000 | ZPE =                             | 0.858516     |              |             |
| C  | 4.10804200  | -1.50414100 | -2.82089000 | H =                               | 0.928781     |              |             |
| C  | 4.29232500  | -1.82431500 | -1.47613200 | G =                               | 0.751458     |              |             |
| C  | 3.59198000  | -2.90557400 | -0.95108700 | <S <sup>2</sup> > =               | 6.0156       |              |             |
| C  | 2.57347500  | -3.35865800 | -3.02746000 | N                                 | -0.47315300  | -0.92361200  | -1.23272600 |
| C  | 3.81151000  | -3.45394600 | 0.40484800  | S                                 | 0.55671900   | -0.06992500  | -0.25784600 |
| C  | 4.70944100  | -2.91523000 | 1.32347700  | S                                 | -0.52926000  | -0.61759700  | -2.84797900 |
| C  | 4.94460000  | -3.60470100 | 2.51232200  | C                                 | 0.08208900   | 1.65400200   | -0.44433500 |
| H  | 5.63469800  | -3.20058800 | 3.24579500  | O                                 | 1.97810600   | -0.17167600  | -0.64242700 |
| C  | 4.31534000  | -4.82276400 | 2.73735800  | O                                 | 0.19501200   | -0.44932500  | 1.12228600  |
| C  | 3.40559600  | -5.32502800 | 1.79414900  | C                                 | -1.72499800  | 0.71325200   | -3.04733700 |
| H  | 3.13060200  | -2.07378000 | -4.65713700 | O                                 | -1.15390800  | -1.80999800  | -3.45925500 |
| H  | 4.63133300  | -0.65808700 | -3.25346100 | O                                 | 0.74415900   | -0.13459700  | -3.42190600 |
| H  | 4.51191500  | -5.39752500 | 3.63507100  | C                                 | -1.18543700  | 2.04836700   | -0.00569200 |







|    |             |             |             |          |             |              |             |
|----|-------------|-------------|-------------|----------|-------------|--------------|-------------|
| O  | 0.57410700  | -0.60244300 | 0.93588200  | C        | 4.12481200  | -4.84450000  | 2.36887000  |
| C  | -1.59239000 | 0.92923600  | -3.02965400 | H        | 4.72363700  | -4.62592600  | 3.24696400  |
| O  | -1.32270700 | -1.61605000 | -3.54190000 | C        | 3.38238300  | -6.01559100  | 2.29706000  |
| O  | 0.73905400  | -0.15249800 | -3.62037600 | C        | 2.58198100  | -6.27019800  | 1.17227500  |
| C  | -0.85718500 | 2.00918400  | 0.06967200  | H        | 3.23965600  | -1.76260200  | -4.48310900 |
| C  | 1.28780900  | 2.53701400  | -0.95646400 | H        | 5.00529100  | -1.12242800  | -2.83744300 |
| C  | -2.94704600 | 0.77497900  | -2.72916000 | H        | 3.39928500  | -6.73977000  | 3.10361000  |
| C  | -1.06456100 | 2.17039200  | -3.38016400 | N        | 2.36116300  | -3.75348500  | -1.95125300 |
| C  | -1.17867800 | 3.36398800  | 0.08441100  | N        | 2.55536900  | -5.37844500  | 0.16648200  |
| H  | -1.55253800 | 1.26707100  | 0.44606200  | C        | 1.76394300  | -7.52311000  | 1.07770600  |
| C  | 0.95744600  | 3.89455700  | -0.93208700 | H        | 0.73607200  | -7.32451500  | 1.38664700  |
| H  | 2.23124000  | 2.18950100  | -1.36171600 | H        | 1.71509800  | -7.87368200  | 0.04722900  |
| C  | -3.78145100 | 1.89060400  | -2.75346400 | H        | 2.19606200  | -8.29682800  | 1.71618600  |
| H  | -3.33935300 | -0.20651900 | -2.50257200 | C        | 1.29214600  | -3.65076200  | -4.15408100 |
| C  | -1.90795800 | 3.28288200  | -3.40238900 | H        | 1.61602100  | -3.42185200  | -5.17169500 |
| H  | -0.01179200 | 2.25914900  | -3.61789700 | H        | 1.12799300  | -4.72208000  | -4.03364400 |
| C  | -0.27205900 | 4.30611400  | -0.41453400 | H        | 0.34666100  | -3.14240800  | -3.95600500 |
| H  | -2.13733300 | 3.68630300  | 0.47911100  | H        | 4.69576500  | -3.04749500  | 1.32062200  |
| H  | 1.65844000  | 4.62664300  | -1.32146000 | H        | 5.08433800  | -2.27679200  | -0.63552600 |
| C  | -3.26088900 | 3.14628000  | -3.08422700 | F        | 0.51111700  | -3.66351500  | 0.12890400  |
| H  | -4.83631900 | 1.77755600  | -2.52091900 | F        | 1.41280900  | -6.29058300  | -2.49216000 |
| H  | -1.50373400 | 4.25650800  | -3.66101100 | N        | -1.81268900 | -7.59620800  | 0.52052700  |
| H  | -0.52844900 | 5.36128600  | -0.40288300 | S        | -2.39599400 | -8.26333100  | -0.95994900 |
| H  | -3.91142600 | 4.01575800  | -3.09950500 | S        | -2.48559400 | -6.13427500  | 1.15732600  |
| Cu | -1.20022900 | -3.11775600 | -0.53501600 | C        | -1.05102600 | -9.37297700  | -1.31372000 |
| C  | -5.02385000 | -2.56427000 | -2.52859100 | O        | -3.57455900 | -9.04144900  | -0.53373600 |
| C  | -5.61862300 | -1.62942800 | -1.69151000 | O        | -2.54625200 | -7.28874700  | -2.04210000 |
| C  | -4.94037600 | -1.21583800 | -0.54826300 | C        | -4.06737900 | -6.74666000  | 1.70262900  |
| C  | -3.66621000 | -1.72963500 | -0.29887900 | O        | -1.64689400 | -5.85716200  | 2.32714300  |
| C  | -3.74872200 | -3.06620500 | -2.22840100 | O        | -2.73418900 | -5.09123300  | 0.15437600  |
| C  | -2.92348400 | -1.41891000 | 0.94458800  | C        | -1.18977100 | -10.71710000 | -0.95700100 |
| C  | -3.33510900 | -0.42196800 | 1.82858000  | C        | 0.09670800  | -8.86978700  | -1.92965300 |
| C  | -2.67447000 | -0.29702800 | 3.04884000  | C        | -4.13431700 | -7.46951700  | 2.89753800  |
| H  | -2.97458600 | 0.46847900  | 3.75708000  | C        | -5.19374600 | -6.50268500  | 0.91127600  |
| C  | -1.64432400 | -1.17441700 | 3.34908000  | C        | -0.13842500 | -11.58975600 | -1.23657900 |
| C  | -1.22982900 | -2.12510300 | 2.40354800  | H        | -2.09940600 | -11.06474500 | -0.48082800 |
| H  | -5.53709600 | -2.92729600 | -3.41143800 | C        | 1.13723900  | -9.76103800  | -2.19525700 |
| H  | -6.60692500 | -1.23931600 | -1.91190200 | H        | 0.20846000  | -7.81704700  | -2.16499800 |
| H  | -1.13005200 | -1.12267200 | 4.30193100  | C        | -5.37313400 | -7.95647200  | 3.31033200  |
| N  | -3.08532900 | -2.61311800 | -1.14363100 | H        | -3.23973500 | -7.63294200  | 3.48790100  |
| N  | -1.86042100 | -2.21397200 | 1.21471300  | C        | -6.42450000 | -6.99414000  | 1.34139500  |
| C  | -0.07550600 | -3.02898800 | 2.71059800  | H        | -5.09970800 | -5.93954100  | -0.01018700 |
| H  | -0.26979900 | -4.03973000 | 2.35905900  | C        | 1.02227200  | -11.11152200 | -1.85282600 |
| H  | 0.80855300  | -2.66095700 | 2.18788900  | H        | -0.22632400 | -12.63911600 | -0.97379600 |
| H  | 0.11232100  | -3.03898400 | 3.78703800  | H        | 2.04202900  | -9.38945800  | -2.66617600 |
| C  | -3.12113000 | -4.12823600 | -3.07201400 | C        | -6.51211500 | -7.72031500  | 2.53385700  |
| H  | -2.18632900 | -3.75841000 | -3.49083300 | H        | -5.45011700 | -8.51711200  | 4.23616900  |
| H  | -2.87404400 | -4.99347700 | -2.45419500 | H        | -7.31377700 | -6.81188800  | 0.74692700  |
| H  | -3.80043100 | -4.42906300 | -3.87230100 | H        | 1.83910100  | -11.79486200 | -2.06528400 |
| H  | -4.15394700 | 0.24065700  | 1.58076900  | H        | -7.47401300 | -8.10316800  | 2.86060800  |
| H  | -5.40677200 | -0.52523500 | 0.14101100  |          |             |              |             |
| F  | -0.22327900 | -6.27589400 | -0.36216400 | <b>1</b> |             |              |             |
| F  | -0.53361700 | -4.18766300 | -2.04208400 | E(BS1) = | -784.091640 |              |             |
| Cu | 0.96988100  | -5.07228600 | -1.17035200 | E(BS2) = | -784.203798 |              |             |
| C  | 3.28584700  | -2.22611200 | -3.50529000 | ZPE =    | 0.148029    |              |             |
| C  | 4.26282500  | -1.87310400 | -2.58791500 | H =      | 0.157588    |              |             |
| C  | 4.30059200  | -2.50544000 | -1.34600700 | G =      | 0.116473    |              |             |
| C  | 3.32188600  | -3.44939200 | -1.05116300 | C        | 0.01839900  | 0.11034700   | -0.04410700 |
| C  | 2.33042400  | -3.19909600 | -3.17294400 | C        | 1.35048700  | 0.18583200   | 0.29513800  |
| C  | 3.32528600  | -4.26123200 | 0.18435600  | C        | 1.90161200  | 1.49501400   | 0.17081600  |
| C  | 4.11146200  | -3.95812400 | 1.29359400  | C        | 0.98959000  | 2.41692400   | -0.26467800 |

|                                |             |             |             |    |             |              |             |
|--------------------------------|-------------|-------------|-------------|----|-------------|--------------|-------------|
| S                              | -0.56550400 | 1.69364600  | -0.53609300 | H  | -3.39649300 | -0.99201700  | 3.64481600  |
| H                              | 1.91273400  | -0.66981400 | 0.65049100  | C  | -1.77771000 | -2.21422400  | 2.92477000  |
| H                              | 2.93135400  | 1.74015700  | 0.40404300  | C  | -1.21420700 | -2.84754100  | 1.80693800  |
| H                              | 1.13271700  | 3.47367200  | -0.44393600 | H  | -5.38577800 | -3.26149500  | -4.14218400 |
| C                              | -0.85599800 | -1.07025600 | -0.03774900 | H  | -6.70530900 | -2.03889400  | -2.40347200 |
| C                              | -2.24459700 | -0.96173700 | 0.16158900  | H  | -1.25895900 | -2.26191700  | 3.87556900  |
| C                              | -0.30802400 | -2.35332200 | -0.22702900 | N  | -3.02454400 | -3.03357500  | -1.76857200 |
| C                              | -3.05554200 | -2.09545600 | 0.17140900  | N  | -1.85305000 | -2.80831100  | 0.62279000  |
| H                              | -2.68991200 | 0.01473100  | 0.32881200  | C  | 0.10045000  | -3.55831800  | 1.90752700  |
| C                              | -1.11952200 | -3.48563700 | -0.20371200 | H  | 0.89312000  | -2.86276100  | 1.62155700  |
| H                              | 0.75630500  | -2.45817800 | -0.41190400 | H  | 0.26733600  | -3.89641600  | 2.93332500  |
| C                              | -2.49765300 | -3.36340500 | -0.00684100 | H  | 0.14843400  | -4.39419300  | 1.20874100  |
| H                              | -4.12461800 | -1.98748000 | 0.32869100  | C  | -2.85683100 | -4.10994800  | -3.99709800 |
| H                              | -0.67538100 | -4.46546400 | -0.35265200 | H  | -2.70772600 | -3.47049000  | -4.86997300 |
| H                              | -3.12947700 | -4.24623300 | 0.00456600  | H  | -1.88346600 | -4.43921000  | -3.64696000 |
| <b>D5-N-4F (Triplet)</b>       |             |             |             | H  | -3.45232700 | -4.97185200  | -4.31070100 |
| E(BS1) = -5954.492587          |             |             |             | H  | -4.57665700 | -0.99830000  | 1.46088900  |
| E(BS2) = -5958.008035          |             |             |             | H  | -5.62897900 | -1.52764700  | -0.22443200 |
| ZPE = 1.008444                 |             |             |             | F  | 0.20507200  | -5.62599600  | -0.55704000 |
| H = 1.089033                   |             |             |             | F  | -0.26624600 | -4.19882200  | -2.66248100 |
| G = 0.888607                   |             |             |             | Cu | 1.37212300  | -4.65324300  | -1.69942300 |
| $\langle S^2 \rangle = 2.8603$ |             |             |             | C  | 2.91199700  | -1.71219400  | -4.47776900 |
| N                              | -0.70235700 | -0.82621100 | -1.79992500 | C  | 3.86538100  | -1.09972100  | -3.68053100 |
| S                              | 0.25013000  | 0.04300000  | -0.76040300 | C  | 4.17511200  | -1.64618500  | -2.43522100 |
| S                              | -0.82577700 | -0.37491700 | -3.37875500 | C  | 3.48555500  | -2.77880300  | -2.01418900 |
| C                              | -0.44440900 | 1.70086300  | -0.74041500 | C  | 2.23835500  | -2.85381000  | -4.01406600 |
| O                              | 1.65686600  | 0.16583000  | -1.18895700 | C  | 3.79187600  | -3.50864600  | -0.76549800 |
| O                              | -0.00742900 | -0.52528200 | 0.57720500  | C  | 4.80642000  | -3.12612300  | 0.11039700  |
| C                              | -2.12438200 | 0.86988100  | -3.43449100 | C  | 5.08681200  | -3.93552600  | 1.20893600  |
| O                              | -1.37340400 | -1.55518600 | -4.08118700 | H  | 5.86767200  | -3.65236200  | 1.90721400  |
| O                              | 0.39438700  | 0.25136200  | -3.92740500 | C  | 4.37589500  | -5.11434600  | 1.38822200  |
| C                              | -1.75331900 | 1.86993100  | -0.27877900 | C  | 3.35748900  | -5.46417700  | 0.48808900  |
| C                              | 0.32029000  | 2.78042600  | -1.17726900 | H  | 2.66225200  | -1.32217300  | -5.45703600 |
| C                              | -3.42475900 | 0.48854200  | -3.09844900 | H  | 4.37928000  | -0.20806900  | -4.02392000 |
| C                              | -1.82317100 | 2.18123700  | -3.79492400 | H  | 4.59236700  | -5.77830000  | 2.21722200  |
| C                              | -2.30146200 | 3.14973800  | -0.25910500 | N  | 2.52632600  | -3.32807600  | -2.79299000 |
| H                              | -2.32961800 | 1.00954200  | 0.04460300  | N  | 3.07700700  | -4.63678000  | -0.53558400 |
| C                              | -0.23707600 | 4.06131500  | -1.14627800 | C  | 2.60903600  | -6.75157400  | 0.61656200  |
| H                              | 1.32817500  | 2.60805700  | -1.53685300 | H  | 1.53877100  | -6.57232000  | 0.51152300  |
| C                              | -4.43931500 | 1.44261900  | -3.11320600 | H  | 2.89718700  | -7.40727600  | -0.20926600 |
| H                              | -3.63520100 | -0.53894800 | -2.83713500 | H  | 2.83683400  | -7.23599000  | 1.56782800  |
| C                              | -2.84644800 | 3.13192200  | -3.80497300 | C  | 1.21963400  | -3.55065600  | -4.85909000 |
| H                              | -0.80378600 | 2.44818900  | -4.04592600 | H  | 0.24068100  | -3.09185400  | -4.70351400 |
| C                              | -1.54356700 | 4.24445300  | -0.69024000 | H  | 1.49313800  | -3.46811400  | -5.91235600 |
| H                              | -3.32078500 | 3.29479200  | 0.08488300  | H  | 1.15651400  | -4.59838800  | -4.57654600 |
| H                              | 0.34773600  | 4.91169900  | -1.48342800 | H  | 5.37389800  | -2.22122300  | -0.06171000 |
| C                              | -4.14977900 | 2.76592400  | -3.46353600 | H  | 4.93746700  | -1.19452300  | -1.81470000 |
| H                              | -5.45326300 | 1.15329300  | -2.85293800 | F  | 0.81026600  | -3.05243500  | -0.70645300 |
| H                              | -2.62053100 | 4.15941800  | -4.07244100 | F  | 1.85010600  | -6.07352500  | -2.80127300 |
| H                              | -1.97681500 | 5.24007200  | -0.67468600 | N  | 2.63791100  | -7.69360100  | -4.02187900 |
| H                              | -4.94058000 | 3.51015300  | -3.46956500 | S  | 1.76055500  | -8.93644200  | -3.19679100 |
| Cu                             | -1.03679300 | -3.10058200 | -1.24242800 | S  | 4.23730700  | -7.25128500  | -3.49618000 |
| C                              | -4.94371900 | -2.99569300 | -3.18846800 | C  | 0.07943900  | -8.47812900  | -3.57096500 |
| C                              | -5.67351300 | -2.32172600 | -2.22293400 | O  | 2.11487300  | -10.14053200 | -3.97104600 |
| C                              | -5.06656000 | -2.02427800 | -1.00333100 | O  | 1.96394000  | -8.94725400  | -1.74479500 |
| C                              | -3.73981200 | -2.39701900 | -0.79980400 | C  | 5.10666900  | -8.66422400  | -4.15037500 |
| C                              | -3.60668300 | -3.35265500 | -2.94350500 | O  | 4.55633800  | -6.06726700  | -4.30116400 |
| C                              | -3.05723700 | -2.20337500 | 0.50206300  | O  | 4.41500000  | -7.22082300  | -2.04329100 |
| C                              | -3.63205500 | -1.51491400 | 1.56887800  | C  | -0.52243100 | -9.06205200  | -4.69014000 |
| C                              | -2.96970400 | -1.51661900 | 2.79610700  | C  | -0.60075300 | -7.59689200  | -2.72695900 |
|                                |             |             |             | C  | 5.53328500  | -8.64830400  | -5.48156000 |

|   |             |              |              |    |             |             |             |
|---|-------------|--------------|--------------|----|-------------|-------------|-------------|
| C | 5.30985100  | -9.76783400  | -3.31532100  | C  | -4.44928000 | 1.48691000  | -3.10974000 |
| C | -1.85557500 | -8.75962000  | -4.96389200  | H  | -3.68582600 | -0.51246300 | -2.84403100 |
| H | 0.03982300  | -9.73947000  | -5.32199400  | C  | -2.82334800 | 3.14506700  | -3.80000400 |
| C | -1.93375200 | -7.30947100  | -3.01978800  | H  | -0.79642400 | 2.41946100  | -4.05032900 |
| H | -0.11836100 | -7.12276400  | -1.88110300  | C  | -1.53538800 | 4.24032800  | -0.66934500 |
| C | 6.18629100  | -9.77211100  | -5.98477600  | H  | -3.31819400 | 3.28678000  | 0.08801500  |
| H | 5.36891700  | -7.77283200  | -6.09886200  | H  | 0.36076100  | 4.91112600  | -1.44784300 |
| C | 5.96406000  | -10.88248600 | -3.83464300  | C  | -4.13314600 | 2.80508600  | -3.45605800 |
| H | 4.96156400  | -9.74585100  | -2.28891900  | H  | -5.46835900 | 1.21804500  | -2.84748300 |
| C | -2.55956000 | -7.88825600  | -4.12669000  | H  | -2.57671400 | 4.16867300  | -4.06407300 |
| H | -2.34112500 | -9.19925300  | -5.82887800  | H  | -1.96481800 | 5.23732900  | -0.64100200 |
| H | -2.47576000 | -6.61900800  | -2.38226600  | H  | -4.90815300 | 3.56577700  | -3.45694500 |
| C | 6.39791700  | -10.88474100 | -5.16456600  | Cu | -1.07359000 | -3.10939000 | -1.22836500 |
| H | 6.52996500  | -9.77883100  | -7.01396900  | C  | -5.01126400 | -2.94781100 | -3.11299700 |
| H | 6.13520900  | -11.74816300 | -3.20327500  | C  | -5.71157500 | -2.25155200 | -2.14314600 |
| H | -3.59873400 | -7.65765600  | -4.34293800  | C  | -5.07894500 | -1.95640300 | -0.93417700 |
| H | 6.90483300  | -11.75800900 | -5.56327900  | C  | -3.75765200 | -2.35649000 | -0.74826400 |
| C | 0.33343900  | -5.47429600  | -7.87223800  | C  | -3.67822300 | -3.33046100 | -2.88545800 |
| C | 1.29386400  | -4.69041900  | -8.47478100  | C  | -3.04953400 | -2.16919000 | 0.54074400  |
| C | 2.61421400  | -4.94911200  | -8.00049200  | C  | -3.59505500 | -1.47143200 | 1.61670400  |
| C | 2.65285600  | -5.92847000  | -7.04371100  | C  | -2.91056900 | -1.48064200 | 2.83173600  |
| S | 1.07566100  | -6.56260500  | -6.71624000  | H  | -3.31446100 | -0.94874500 | 3.68707700  |
| H | 1.05460100  | -3.92430300  | -9.20368500  | C  | -1.72668000 | -2.19524900 | 2.94033200  |
| H | 3.49300900  | -4.41134200  | -8.33828800  | C  | -1.19291700 | -2.83887900 | 1.81399800  |
| H | 3.49685000  | -6.27894600  | -6.46884300  | H  | -5.47334600 | -3.21117700 | -4.05786900 |
| C | -1.11983900 | -5.45493200  | -8.08158600  | H  | -6.73983000 | -1.94807200 | -2.30811500 |
| C | -2.01024900 | -5.80305100  | -7.04873600  | H  | -1.19175400 | -2.24921800 | 3.88177600  |
| C | -1.65615000 | -5.07403700  | -9.32618500  | N  | -3.07177000 | -3.01608600 | -1.72237100 |
| C | -3.38808800 | -5.77995200  | -7.25842500  | N  | -1.85206200 | -2.79114300 | 0.64142600  |
| H | -1.62262400 | -6.07826300  | -6.07350300  | C  | 0.11112700  | -3.57180500 | 1.89207100  |
| C | -3.03517100 | -5.03468200  | -9.52611600  | H  | 0.91175600  | -2.88893100 | 1.59795700  |
| H | -0.98515300 | -4.82553200  | -10.14274900 | H  | 0.28703100  | -3.91810600 | 2.91362100  |
| C | -3.90929100 | -5.39171400  | -8.49513400  | H  | 0.13352800  | -4.40453500 | 1.18824100  |
| H | -4.05686200 | -6.05836400  | -6.44911900  | C  | -2.96041700 | -4.11624700 | -3.94039900 |
| H | -3.42800900 | -4.73741000  | -10.49430200 | H  | -2.88284100 | -3.52133400 | -4.85312400 |
| H | -4.98313100 | -5.36943200  | -8.65529200  | H  | -1.95941000 | -4.39731000 | -3.62835800 |
|   |             |              |              | H  | -3.54316900 | -5.01230900 | -4.17452400 |
|   |             |              |              | H  | -4.53455100 | -0.94244300 | 1.52523500  |
|   |             |              |              | H  | -5.61783600 | -1.44001100 | -0.15145600 |
|   |             |              |              | F  | 0.13094200  | -5.61200600 | -0.59268200 |
|   |             |              |              | F  | -0.32388300 | -4.15379900 | -2.68850800 |
|   |             |              |              | Cu | 1.31857600  | -4.65456400 | -1.73865200 |
|   |             |              |              | C  | 2.89222300  | -1.74468900 | -4.53613900 |
|   |             |              |              | C  | 3.85411800  | -1.13734000 | -3.74519300 |
|   |             |              |              | C  | 4.15594700  | -1.67477600 | -2.49388800 |
|   |             |              |              | C  | 3.44938300  | -2.79235700 | -2.06089600 |
|   |             |              |              | C  | 2.20213600  | -2.87198700 | -4.06100800 |
|   |             |              |              | C  | 3.74472100  | -3.51407700 | -0.80503000 |
|   |             |              |              | C  | 4.75053400  | -3.12563900 | 0.07830300  |
|   |             |              |              | C  | 5.02034700  | -3.92752600 | 1.18500700  |
|   |             |              |              | H  | 5.79397900  | -3.63918800 | 1.88919700  |
|   |             |              |              | C  | 4.30715700  | -5.10471800 | 1.36609100  |
|   |             |              |              | C  | 3.29676400  | -5.45990800 | 0.45893400  |
|   |             |              |              | H  | 2.64999000  | -1.36279900 | -5.52059600 |
|   |             |              |              | H  | 4.38187700  | -0.25778200 | -4.09868800 |
|   |             |              |              | H  | 4.51427000  | -5.76218800 | 2.20262400  |
|   |             |              |              | N  | 2.48248800  | -3.33527100 | -2.83428800 |
|   |             |              |              | N  | 3.02785600  | -4.64077000 | -0.57387400 |
|   |             |              |              | C  | 2.54188500  | -6.74312400 | 0.59186800  |
|   |             |              |              | H  | 1.47323400  | -6.55952600 | 0.47478300  |
|   |             |              |              | H  | 2.83599100  | -7.40818700 | -0.22440600 |

**D5-N-4F (Quintet)**  
E(BS1) = -5954.488806  
E(BS2) = -5958.004977  
ZPE = 1.008239  
H = 1.088859  
G = 0.887946  
<S<sup>2</sup>> = 6.0151

|   |             |             |             |
|---|-------------|-------------|-------------|
| N | -0.73447000 | -0.83344100 | -1.80486200 |
| S | 0.24397100  | 0.03342700  | -0.79026700 |
| S | -0.87482400 | -0.40443400 | -3.38861700 |
| C | -0.44629400 | 1.69302000  | -0.75324000 |
| O | 1.64069200  | 0.15421200  | -1.25155200 |
| O | 0.01740600  | -0.53258500 | 0.55414000  |
| C | -2.14802400 | 0.86665000  | -3.44114700 |
| O | -1.45730000 | -1.58340200 | -4.06418200 |
| O | 0.34848500  | 0.18840300  | -3.96662000 |
| C | -1.75538200 | 1.86109800  | -0.29172500 |
| C | 0.32389100  | 2.77576800  | -1.17200900 |
| C | -3.45485800 | 0.51161900  | -3.10175200 |
| C | -1.82034300 | 2.17305600  | -3.79682100 |
| C | -2.29850600 | 3.14260000  | -0.25527700 |
| H | -2.33621300 | 0.99847200  | 0.01715000  |
| C | -0.22843300 | 4.05841400  | -1.12443000 |
| H | 1.33260100  | 2.60475000  | -1.53003400 |

|   |             |              |              |                                        |
|---|-------------|--------------|--------------|----------------------------------------|
| H | 2.75705200  | -7.21919400  | 1.55027000   | ZPE = 1.008094                         |
| C | 1.17733800  | -3.56696000  | -4.90136500  | H = 1.088678                           |
| H | 0.20360900  | -3.09210300  | -4.75835300  | G = 0.889691                           |
| H | 1.45815700  | -3.50377600  | -5.95433700  | $\langle S^2 \rangle = 3.0238$         |
| H | 1.09883300  | -4.60927000  | -4.60223400  | N -0.49139000 -0.67822700 -1.02449600  |
| H | 5.31834700  | -2.22089400  | -0.09366300  | S 0.50385000 -0.79335100 0.29064700    |
| H | 4.92664700  | -1.22929500  | -1.87913900  | S 0.08452700 -0.09938600 -2.45220700   |
| F | 0.79002500  | -3.06320100  | -0.72768600  | C 1.07371100 0.87991000 0.62410800     |
| F | 1.73501200  | -6.06554600  | -2.85594300  | O 1.70725200 -1.62114900 0.08104100    |
| N | 2.68751100  | -7.91786800  | -4.11740300  | O -0.37945200 -1.15523900 1.41787700   |
| S | 1.76691800  | -9.05705500  | -3.20223100  | C -0.06701600 1.69154400 -2.34156200   |
| S | 4.20766500  | -7.31478600  | -3.53077600  | O -0.89249600 -0.50654300 -3.48332100  |
| C | 0.10430000  | -8.56347900  | -3.59983500  | O 1.50985600 -0.39771000 -2.70509600   |
| O | 2.07731400  | -10.31922900 | -3.90049300  | C 0.13167500 1.84627600 0.98876400     |
| O | 1.97511900  | -8.98728800  | -1.75314400  | C 2.42806400 1.18856500 0.51459800     |
| C | 5.18562500  | -8.67984200  | -4.13038900  | C -1.34717700 2.23979500 -2.23614900   |
| O | 4.47136800  | -6.12823000  | -4.35096100  | C 1.06860300 2.49725200 -2.35386700    |
| O | 4.33566400  | -7.24840300  | -2.07464800  | C 0.56087200 3.14601300 1.24531900     |
| C | -0.49265400 | -9.12978700  | -4.73158300  | H -0.91761400 1.57983200 1.05832100    |
| C | -0.56824000 | -7.66746300  | -2.76381300  | C 2.84938300 2.49390400 0.78112300     |
| C | 5.72643300  | -8.62172900  | -5.41903300  | H 3.12793600 0.41484800 0.22088400     |
| C | 5.35521900  | -9.79364600  | -3.29879400  | C -1.48893500 3.62117600 -2.12929900   |
| C | -1.81220300 | -8.79424400  | -5.02652300  | H -2.21339800 1.59158600 -2.24365600   |
| H | 0.06352300  | -9.81915500  | -5.35588500  | C 0.91727200 3.88175000 -2.24523400    |
| C | -1.88853400 | -7.34742200  | -3.07788700  | H 2.04799100 2.04095400 -2.43147700    |
| H | -0.08601200 | -7.20455800  | -1.91292400  | C 1.91859900 3.46920800 1.14317200     |
| C | 6.46636100  | -9.70894200  | -5.87942500  | H -0.16149400 3.90897400 1.51840900    |
| H | 5.58078200  | -7.73954300  | -6.03179500  | H 3.90204000 2.74743500 0.69970600     |
| C | 6.09442200  | -10.87238200 | -3.77657300  | C -0.35603200 4.44273100 -2.13074100   |
| H | 4.91732000  | -9.80494400  | -2.30684100  | H -2.48103600 4.05548800 -2.04640000   |
| C | -2.50834600 | -7.90746700  | -4.19763800  | H 1.79644400 4.51856800 -2.24139800    |
| H | -2.29456100 | -9.21965900  | -5.90031200  | H 2.24813600 4.48475500 1.34163700     |
| H | -2.42354800 | -6.64597900  | -2.44701800  | H -0.46757700 5.51941300 -2.04251700   |
| C | 6.64619400  | -10.82986700 | -5.06209900  | Cu -2.24233400 -2.36702000 -1.10672900 |
| H | 6.90151600  | -9.68238500  | -6.87301900  | C -4.64838100 0.38833300 -3.44345200   |
| H | 6.24135100  | -11.74470900 | -3.14838300  | C -4.96559100 1.31690000 -2.46052000   |
| H | -3.53719400 | -7.65049400  | -4.43241700  | C -4.61901000 1.05425700 -1.13638900   |
| H | 7.21963200  | -11.67560900 | -5.42863000  | C -3.93438800 -0.12496000 -0.84481900  |
| C | 0.32398600  | -5.49516500  | -7.87041400  | C -3.95963600 -0.78483900 -3.10167100  |
| C | 1.31023700  | -4.74721500  | -8.47683000  | C -3.62425200 -0.55604000 0.53943300   |
| C | 2.62401200  | -5.06841800  | -8.02268000  | C -3.91467200 0.20602000 1.66858000    |
| C | 2.63195000  | -6.06048900  | -7.07846800  | C -3.72533700 -0.37024700 2.92510900   |
| S | 1.03251000  | -6.62719300  | -6.73567500  | H -3.94738100 0.19863400 3.82224800    |
| H | 1.09505100  | -3.96381300  | -9.19476200  | C -3.28109500 -1.68192700 3.01485100   |
| H | 3.52133300  | -4.56728100  | -8.36801100  | C -2.95969100 -2.39028500 1.84774800   |
| H | 3.46749600  | -6.46323900  | -6.52657400  | H -4.93120900 0.55229000 -4.47671900   |
| C | -1.12915800 | -5.41067300  | -8.06431600  | H -5.49328500 2.23025600 -2.71496400   |
| C | -2.02472800 | -5.71488600  | -7.02203300  | H -3.16178300 -2.16624600 3.97751600   |
| C | -1.65874000 | -5.01028600  | -9.30569100  | N -3.59203500 -1.00083500 -1.82270000  |
| C | -3.40214200 | -5.63095700  | -7.22062500  | N -3.11442600 -1.80417000 0.64814400   |
| H | -1.64016800 | -6.00203300  | -6.04876900  | C -2.44210100 -3.79554800 1.90416700   |
| C | -3.03623600 | -4.91003300  | -9.49427700  | H -1.34995200 -3.76943000 1.91269500   |
| H | -0.98409800 | -4.79469300  | -10.12861500 | H -2.80083800 -4.29450000 2.80790700   |
| C | -3.91611200 | -5.22467500  | -8.45455400  | H -2.73647300 -4.34391000 1.00822000   |
| H | -4.07659900 | -5.87456600  | -6.40500300  | C -3.63658200 -1.82384100 -4.13044600  |
| H | -3.42381300 | -4.59867600  | -10.46015000 | H -2.55780600 -1.85454200 -4.28449500  |
| H | -4.98929900 | -5.15537400  | -8.60546500  | H -3.93131300 -2.81346300 -3.77468300  |
|   |             |              |              | H -4.14674000 -1.60241900 -5.06979300  |
|   |             |              |              | H -4.29663800 1.21487800 1.58177600    |
|   |             |              |              | H -4.89026300 1.74929300 -0.35283200   |
|   |             |              |              | F -3.03946100 -4.71561900 -1.14936700  |

**D6-N-4F (Triplet)**

E(BS1) = -5954.505644

E(BS2) = -5958.027465

|                            |             |              |             |
|----------------------------|-------------|--------------|-------------|
| F                          | -1.64870300 | -3.24284600  | -2.74366700 |
| Cu                         | -1.23232600 | -4.86785300  | -1.77318000 |
| C                          | 2.74136900  | -3.62124700  | -2.88076800 |
| C                          | 3.42506900  | -3.97278200  | -1.72933000 |
| C                          | 2.79382100  | -4.76048200  | -0.76592800 |
| C                          | 1.47583100  | -5.13877100  | -0.97854800 |
| C                          | 1.40293900  | -4.01318000  | -3.04829200 |
| C                          | 0.72380000  | -6.05796100  | -0.10212300 |
| C                          | 1.27869900  | -6.73553900  | 0.98317100  |
| C                          | 0.48904600  | -7.64799000  | 1.67818400  |
| H                          | 0.90149300  | -8.18346600  | 2.52719300  |
| C                          | -0.81544000 | -7.89707900  | 1.25953600  |
| C                          | -1.33143900 | -7.20197000  | 0.15957400  |
| H                          | 3.21690900  | -3.04842800  | -3.66659800 |
| H                          | 4.45431500  | -3.66177100  | -1.58536500 |
| H                          | -1.43578200 | -8.63200800  | 1.75982400  |
| N                          | 0.81251000  | -4.72812200  | -2.08454000 |
| N                          | -0.56029500 | -6.29104000  | -0.45902900 |
| C                          | -2.69826400 | -7.46224100  | -0.39907600 |
| H                          | -3.37273200 | -6.64539300  | -0.13645800 |
| H                          | -2.63708700 | -7.46471400  | -1.49029100 |
| H                          | -3.08935100 | -8.41319500  | -0.03354500 |
| C                          | 0.63224600  | -3.67032600  | -4.28631000 |
| H                          | 0.20677800  | -2.66769100  | -4.19474600 |
| H                          | 1.30624900  | -3.71445500  | -5.14342000 |
| H                          | -0.17961800 | -4.38370500  | -4.42053100 |
| H                          | 2.31218900  | -6.57701000  | 1.25943200  |
| H                          | 3.32817700  | -5.08584100  | 0.11625200  |
| F                          | -0.88209200 | -3.54621600  | -0.36374900 |
| F                          | -1.58712800 | -6.03450600  | -3.16885400 |
| N                          | 2.20839400  | -7.66914000  | -3.83191700 |
| S                          | 3.42851900  | -8.06707500  | -2.82112400 |
| S                          | 2.37857300  | -6.85956900  | -5.25054900 |
| C                          | 3.46127200  | -9.87107400  | -2.86390300 |
| O                          | 4.74771600  | -7.58811500  | -3.29279400 |
| O                          | 3.04237700  | -7.71672600  | -1.43943600 |
| C                          | 3.25220300  | -7.94481200  | -6.39065500 |
| O                          | 1.00004900  | -6.72397500  | -5.76287000 |
| O                          | 3.19674000  | -5.63952600  | -5.12356100 |
| C                          | 3.41497900  | -10.55806600 | -4.08064800 |
| C                          | 3.61801600  | -10.55705800 | -1.65701400 |
| C                          | 2.51567100  | -8.78601400  | -7.22867900 |
| C                          | 4.64915500  | -7.97847700  | -6.37054000 |
| C                          | 3.53325700  | -11.94791900 | -4.08369300 |
| H                          | 3.27710200  | -10.02096300 | -5.00903200 |
| C                          | 3.73525800  | -11.94748500 | -1.67129600 |
| H                          | 3.63108600  | -10.00301700 | -0.72566100 |
| C                          | 3.19227400  | -9.69608200  | -8.04225000 |
| H                          | 1.43453700  | -8.71891200  | -7.24389900 |
| C                          | 5.31364500  | -8.89411500  | -7.18727200 |
| H                          | 5.19291600  | -7.31799500  | -5.70766200 |
| C                          | 3.69543800  | -12.64312100 | -2.88252700 |
| H                          | 3.48999400  | -12.48536400 | -5.02599500 |
| H                          | 3.84162100  | -12.48776700 | -0.73635500 |
| C                          | 4.58865200  | -9.75586900  | -8.01546300 |
| H                          | 2.62988200  | -10.35403700 | -8.69766400 |
| H                          | 6.39839600  | -8.93514600  | -7.17505900 |
| H                          | 3.77453700  | -13.72540700 | -2.88801900 |
| H                          | 5.11170500  | -10.46893200 | -8.64552700 |
| C                          | 0.34162900  | -12.16518900 | -2.14149100 |
| C                          | 0.15019600  | -10.91796000 | -2.82961400 |
| C                          | 0.48421500  | -12.21364100 | -0.73122200 |
| C                          | 0.41511900  | -13.38222200 | -2.86621500 |
| C                          | 0.05302500  | -10.69483200 | -4.22301400 |
| S                          | 0.01501100  | -9.38619600  | -1.96570700 |
| C                          | 0.69202100  | -13.42036600 | -0.08071400 |
| H                          | 0.44379200  | -11.29883500 | -0.14841000 |
| C                          | 0.62295800  | -14.58539400 | -2.20739000 |
| H                          | 0.31333100  | -13.37987000 | -3.94450000 |
| C                          | -0.11114200 | -9.36256600  | -4.55722200 |
| H                          | 0.11506600  | -11.49154200 | -4.95203500 |
| C                          | -0.11590300 | -8.50670900  | -3.43536000 |
| C                          | 0.76435800  | -14.61161100 | -0.81452800 |
| H                          | 0.80321600  | -13.43813600 | 0.99837100  |
| H                          | 0.67864300  | -15.50702000 | -2.77728700 |
| H                          | -0.19295700 | -8.96763600  | -5.55942800 |
| H                          | -0.37598900 | -7.45073600  | -3.41320300 |
| H                          | 0.93003300  | -15.55460000 | -0.30332600 |
| <b>D6-N-4F (Quintet)</b>   |             |              |             |
| E(BS1) = -5954.505628      |             |              |             |
| E(BS2) = -5958.027447      |             |              |             |
| ZPE = 1.008099             |             |              |             |
| H = 1.08868                |             |              |             |
| G = 0.889238               |             |              |             |
| <S <sup>2</sup> > = 6.0249 |             |              |             |
| N                          | -0.49148400 | -0.67819300  | -1.02433200 |
| S                          | 0.50364300  | -0.79364600  | 0.29086600  |
| S                          | 0.08466100  | -0.09936700  | -2.45196100 |
| C                          | 1.07376200  | 0.87947200   | 0.62460800  |
| O                          | 1.70694000  | -1.62159500  | 0.08124200  |
| O                          | -0.37980800 | -1.15555300  | 1.41797500  |
| C                          | -0.06634200 | 1.69159600   | -2.34112000 |
| O                          | -0.89245400 | -0.50611200  | -3.48314800 |
| O                          | 1.50990600  | -0.39810100  | -2.70483500 |
| C                          | 0.13186100  | 1.84598300   | 0.98922500  |
| C                          | 2.42819900  | 1.18786300   | 0.51538400  |
| C                          | -1.34634500 | 2.24022600   | -2.23576100 |
| C                          | 1.06952800  | 2.49695500   | -2.35319200 |
| C                          | 0.56128400  | 3.14559400   | 1.24604200  |
| H                          | -0.91749800 | 1.57975500   | 1.05854300  |
| C                          | 2.84974400  | 2.49307500   | 0.78217500  |
| H                          | 3.12796500  | 0.41404400   | 0.22167900  |
| C                          | -1.48768500 | 3.62163600   | -2.12873300 |
| H                          | -2.21276400 | 1.59228200   | -2.24343800 |
| C                          | 0.91861500  | 3.88148500   | -2.24438400 |
| H                          | 2.04878400  | 2.04036700   | -2.43076500 |
| C                          | 1.91909700  | 3.46852000   | 1.14419400  |
| H                          | -0.16097300 | 3.90866800   | 1.51910400  |
| H                          | 3.90246800  | 2.74639600   | 0.70098400  |
| C                          | -0.35452900 | 4.44284200   | -2.12994600 |
| H                          | -2.47966000 | 4.05624600   | -2.04587000 |
| H                          | 1.79798200  | 4.51803100   | -2.24036900 |
| H                          | 2.24881000  | 4.48397000   | 1.34286700  |
| H                          | -0.46575000 | 5.51954600   | -2.04158300 |
| Cu                         | -2.24270100 | -2.36672800  | -1.10700000 |
| C                          | -4.64793200 | 0.38937300   | -3.44362400 |
| C                          | -4.96497600 | 1.31792100   | -2.46061900 |
| C                          | -4.61855900 | 1.05506100   | -1.13648600 |
| C                          | -3.93426100 | -0.12436000  | -0.84498800 |
| C                          | -3.95950600 | -0.78400600  | -3.10191200 |
| C                          | -3.62432400 | -0.55568000  | 0.53923400  |

C -3.91458100 0.20632200 1.66845800  
 C -3.72545600 -0.37015000 2.92492700  
 H -3.94737500 0.19868700 3.82212400  
 C -3.28159600 -1.68196800 3.01453300  
 C -2.96033900 -2.39027800 1.84735900  
 H -4.93064300 0.55350800 -4.47689500  
 H -5.49241800 2.23143700 -2.71501100  
 H -3.16247000 -2.16643900 3.97714400  
 N -3.59206400 -1.00021900 -1.82293600  
 N -3.11484800 -1.80396700 0.64782500  
 C -2.44317300 -3.79570700 1.90364000  
 H -1.35101700 -3.76993000 1.91247300  
 H -2.80228700 -4.29471400 2.80720000  
 H -2.73748200 -4.34383800 1.00752900  
 C -3.63662000 -1.82300000 -4.13074900  
 H -2.55783000 -1.85401400 -4.28463800  
 H -3.93171300 -2.81256900 -3.77513000  
 H -4.14657300 -1.60133200 -5.07014900  
 H -4.29626200 1.21529700 1.58175700  
 H -4.88968800 1.75008700 -0.35287700  
 F -3.03979100 -4.71561800 -1.15021300  
 F -1.64887400 -3.24232300 -2.74390600  
 Cu -1.23252800 -4.86752000 -1.77359700  
 C 2.74156400 -3.62145100 -2.88072900  
 C 3.42507200 -3.97299100 -1.72917600  
 C 2.79350700 -4.76025700 -0.76562600  
 C 1.47543200 -5.13821500 -0.97828300  
 C 1.40301800 -4.01298800 -3.04826300  
 C 0.72314500 -6.05728100 -0.10194700  
 C 1.27756700 -6.73446200 0.98383200  
 C 0.48780400 -7.64713200 1.67844000  
 H 0.89990200 -8.18234300 2.52778500  
 C -0.81632700 -7.89675500 1.25899900  
 C -1.33193500 -7.20183400 0.15873700  
 H 3.21733600 -3.04892700 -3.66663400  
 H 4.45442400 -3.66231500 -1.58522900  
 H -1.43672300 -8.63184400 1.75898600  
 N 0.81234300 -4.72757100 -2.08440500  
 N -0.56068700 -6.29076400 -0.45950300  
 C -2.69850500 -7.46229100 -0.40047800  
 H -3.37328800 -6.64576800 -0.13764700  
 H -2.63706200 -7.46424500 -1.49167300  
 H -3.08941100 -8.41352000 -0.03546900  
 C 0.63238800 -3.67012200 -4.28631900  
 H 0.20648000 -2.66769500 -4.19455200  
 H 1.30647900 -3.71381000 -5.14337200  
 H -0.17917000 -4.38381800 -4.42075300  
 H 2.31079300 -6.57546300 1.26082200  
 H 3.32772500 -5.08563800 0.11663400  
 F -0.88270500 -3.54620800 -0.36393800  
 F -1.58654000 -6.03385900 -3.16969800  
 N 2.20582400 -7.66941900 -3.83309100  
 S 3.42593300 -8.06655200 -2.82189900  
 S 2.37608600 -6.85998000 -5.25183500  
 C 3.46041900 -9.87052800 -2.86479900  
 O 4.74486700 -7.58627600 -3.29295600  
 O 3.03887300 -7.71677100 -1.44033400  
 C 3.25066100 -7.94490400 -6.39152500  
 O 0.99769500 -6.72513900 -5.76467600  
 O 3.19364300 -5.63955300 -5.12466500  
 C 3.41482200 -10.55758800 -4.08152600

C 3.61767800 -10.55636300 -1.65788600  
 C 2.51483500 -8.78651500 -7.22975900  
 C 4.64762300 -7.97788900 -6.37091000  
 C 3.53423900 -11.94734800 -4.08452700  
 H 3.27656500 -10.02064200 -5.00993500  
 C 3.73613100 -11.94668300 -1.67212900  
 H 3.63017100 -10.00230800 -0.72653400  
 C 3.19217200 -9.69631500 -8.04302000  
 H 1.43367200 -8.71994200 -7.24538500  
 C 5.31285000 -8.89326600 -7.18733700  
 H 5.19083600 -7.31710400 -5.70788100  
 C 3.69691500 -12.64238900 -2.88333800  
 H 3.49147700 -12.48484300 -5.02682400  
 H 3.84287700 -12.48684500 -0.73716300  
 C 4.58856800 -9.75543000 -8.01572300  
 H 2.63033400 -10.35458900 -8.69858900  
 H 6.39761500 -8.93377600 -7.17472800  
 H 3.77690100 -13.72461200 -2.88879300  
 H 5.11219100 -10.46829000 -8.64554300  
 C 0.34280400 -12.16627700 -2.14034400  
 C 0.15067700 -10.91959100 -2.82932000  
 C 0.48617600 -12.21363500 -0.73013000  
 C 0.41628600 -13.38382000 -2.86418900  
 C 0.05394300 -10.69736400 -4.22285900  
 S 0.01363700 -9.38744100 -1.96636800  
 C 0.69475900 -13.41980500 -0.07882700  
 H 0.44588500 -11.29839600 -0.14799200  
 C 0.62498300 -14.58642500 -2.20458300  
 H 0.31370000 -13.38232900 -3.94240300  
 C -0.11130300 -9.36541800 -4.55792200  
 H 0.11721400 -11.49442000 -4.95139700  
 C -0.11781500 -8.50899200 -3.43657600  
 C 0.76716000 -14.61156800 -0.81178200  
 H 0.80656700 -13.43671600 1.00021000  
 H 0.68065600 -15.50845700 -2.77382700  
 H -0.19283900 -8.97113800 -5.56040900  
 H -0.37944400 -7.45324000 -3.41499700  
 H 0.93346800 -15.55411600 -0.29997300

**DTSN-N-4F (Triplet)**

E(BS1) = -5954.501304

E(BS2) = -5958.021335

ZPE = 1.007753

H = 1.087537

G = 0.890449

<S<sup>2</sup>> = 3.0306

331.6630i

N -0.46756600 -0.71418500 -1.01924100  
 S 0.51207100 -0.81866300 0.30872300  
 S 0.12077700 -0.12601000 -2.43744200  
 C 1.05994500 0.86064200 0.64890400  
 O 1.72642600 -1.63394700 0.11374600  
 O -0.38107700 -1.18947100 1.42504800  
 C -0.06489000 1.66164900 -2.33004800  
 O -0.83136000 -0.55282400 -3.48418100  
 O 1.55539800 -0.39809100 -2.66657100  
 C 0.10375000 1.81497300 1.00840200  
 C 2.41127000 1.18573900 0.54961800  
 C -1.35595400 2.18696700 -2.24292500  
 C 1.05637200 2.48733100 -2.32473100  
 C 0.51540900 3.11940900 1.27004600



|    |             |             |             |   |             |              |             |
|----|-------------|-------------|-------------|---|-------------|--------------|-------------|
| H  | -0.94259400 | 1.53550000  | 1.07113400  | C | -2.62800600 | -7.52293200  | -0.38286600 |
| C  | 2.81478800  | 2.49571500  | 0.82081900  | H | -3.30452400 | -6.69793800  | -0.15370800 |
| H  | 3.12277500  | 0.42106800  | 0.26017500  | H | -2.55057300 | -7.55914900  | -1.47272800 |
| C  | -1.52380800 | 3.56547200  | -2.13676500 | H | -3.02219400 | -8.46351500  | 0.00511700  |
| H  | -2.21035800 | 1.52371400  | -2.26413500 | C | 0.66912500  | -3.68705800  | -4.26543400 |
| C  | 0.87888000  | 3.86873000  | -2.21657100 | H | 0.21328300  | -2.69934400  | -4.16076700 |
| H  | 2.04466000  | 2.04844000  | -2.38793600 | H | 1.34860500  | -3.69513300  | -5.11928200 |
| C  | 1.86977500  | 3.45917900  | 1.17779800  | H | -0.12110800 | -4.42106800  | -4.41801300 |
| H  | -0.21802300 | 3.87300600  | 1.53962300  | H | 2.38485100  | -6.61876600  | 1.25064100  |
| H  | 3.86487300  | 2.76203700  | 0.74741000  | H | 3.36389400  | -5.06961100  | 0.14900600  |
| C  | -0.40572000 | 4.40692600  | -2.12015800 | F | -0.85280500 | -3.57739700  | -0.36385500 |
| H  | -2.52461200 | 3.98189800  | -2.06829700 | F | -1.51577600 | -6.10144400  | -3.15030400 |
| H  | 1.74649200  | 4.52097000  | -2.19867400 | N | 2.15513700  | -7.74929500  | -3.89076000 |
| H  | 2.18565600  | 4.47826200  | 1.38027500  | S | 3.45382000  | -8.13086900  | -2.89740900 |
| H  | -0.53758700 | 5.48131200  | -2.03208700 | S | 2.33762900  | -6.85426600  | -5.30898700 |
| Cu | -2.21214600 | -2.40918800 | -1.11817900 | C | 3.48809800  | -9.92556200  | -2.91460800 |
| C  | -4.61932800 | 0.32515000  | -3.48109100 | O | 4.69859700  | -7.64205600  | -3.51591800 |
| C  | -4.96039200 | 1.24818100  | -2.50095200 | O | 3.15031900  | -7.71157900  | -1.52134300 |
| C  | -4.62606200 | 0.98808700  | -1.17332700 | C | 3.21788000  | -7.90636000  | -6.46764400 |
| C  | -3.92973400 | -0.18260900 | -0.87480500 | O | 0.96077400  | -6.69716700  | -5.80372900 |
| C  | -3.92016000 | -0.83984600 | -3.13260200 | O | 3.15928000  | -5.65938000  | -5.08598300 |
| C  | -3.63011500 | -0.60960500 | 0.51297500  | C | 3.47212800  | -10.60967500 | -4.13227900 |
| C  | -3.94346100 | 0.14982500  | 1.63788700  | C | 3.60076800  | -10.60101900 | -1.69800700 |
| C  | -3.76234000 | -0.42303700 | 2.89712800  | C | 2.48826900  | -8.79369300  | -7.26382000 |
| H  | -4.00235500 | 0.14362500  | 3.79103100  | C | 4.61218600  | -7.84690900  | -6.52350500 |
| C  | -3.30278600 | -1.72895700 | 2.99318000  | C | 3.55961700  | -12.00133500 | -4.12332700 |
| C  | -2.95845400 | -2.43423300 | 1.83074200  | H | 3.37856100  | -10.07229400 | -5.06730700 |
| H  | -4.89170600 | 0.48690800  | -4.51749800 | C | 3.69204600  | -11.99293200 | -1.70415700 |
| H  | -5.49677000 | 2.15500000  | -2.76052200 | H | 3.59179600  | -10.04210600 | -0.76975900 |
| H  | -3.18914900 | -2.21109400 | 3.95761800  | C | 3.17661900  | -9.65922400  | -8.11388500 |
| N  | -3.56480700 | -1.05323400 | -1.84937100 | H | 1.40632400  | -8.79869000  | -7.22391500 |
| N  | -3.10602300 | -1.85111500 | 0.62861100  | C | 5.28713400  | -8.71841200  | -7.37897400 |
| C  | -2.42388900 | -3.83259600 | 1.89546600  | H | 5.14633000  | -7.14621000  | -5.89576400 |
| H  | -1.33224100 | -3.79223200 | 1.91048900  | C | 3.66881800  | -12.69177300 | -2.91297600 |
| H  | -2.78207100 | -4.33277400 | 2.79871800  | H | 3.53555600  | -12.54410800 | -5.06302900 |
| H  | -2.70591300 | -4.38771800 | 0.99973600  | H | 3.75720900  | -12.53084100 | -0.76434900 |
| C  | -3.57293200 | -1.87290900 | -4.15944100 | C | 4.57350600  | -9.62690200  | -8.16526000 |
| H  | -2.49160700 | -1.89625200 | -4.29548500 | H | 2.62237100  | -10.35323400 | -8.73775100 |
| H  | -3.86686000 | -2.86584900 | -3.81235600 | H | 6.37086400  | -8.68721000  | -7.42923300 |
| H  | -4.06869700 | -1.65118800 | -5.10636900 | H | 3.72228200  | -13.77572200 | -2.91118100 |
| H  | -4.33658300 | 1.15385400  | 1.54555700  | H | 5.10531200  | -10.30546000 | -8.82514700 |
| H  | -4.91581300 | 1.67848400  | -0.39232600 | C | 0.26100000  | -12.00829100 | -2.03012800 |
| F  | -2.99829500 | -4.77918700 | -1.14826100 | C | 0.17736100  | -10.77229600 | -2.77111500 |
| F  | -1.62110700 | -3.30291000 | -2.74578500 | C | 0.40777500  | -12.01327200 | -0.62262100 |
| Cu | -1.19001400 | -4.91813700 | -1.76202200 | C | 0.23210600  | -13.25508000 | -2.69945000 |
| C  | 2.76960300  | -3.60924800 | -2.84920900 | C | 0.01104500  | -10.59325300 | -4.16184200 |
| C  | 3.45335100  | -3.95452500 | -1.69584900 | S | 0.30846900  | -9.20183200  | -1.97451800 |
| C  | 2.83087600  | -4.75690000 | -0.73875100 | C | 0.52859900  | -13.20677900 | 0.07870000  |
| C  | 1.52116900  | -5.15828100 | -0.96061900 | H | 0.43811000  | -11.07516600 | -0.07644600 |
| C  | 1.44001500  | -4.02599100 | -3.02655500 | C | 0.35493700  | -14.44468500 | -1.99208500 |
| C  | 0.77858300  | -6.08796300 | -0.08604400 | H | 0.13165000  | -13.29059400 | -3.77807500 |
| C  | 1.34857700  | -6.77685200 | 0.98408000  | C | 0.04070100  | -9.27962000  | -4.57123100 |
| C  | 0.56913400  | -7.69994300 | 1.67744700  | H | -0.13987200 | -11.42028900 | -4.84424500 |
| H  | 0.99235800  | -8.24402900 | 2.51559100  | C | 0.35024500  | -8.33879500  | -3.51447700 |
| C  | -0.73778100 | -7.94929200 | 1.26837600  | C | 0.50656400  | -14.42975200 | -0.60077500 |
| C  | -1.26665100 | -7.24682400 | 0.17873400  | H | 0.64414000  | -13.18526600 | 1.15793200  |
| H  | 3.23788000  | -3.01919300 | -3.62684400 | H | 0.33756100  | -15.38925700 | -2.52702300 |
| H  | 4.47492700  | -3.62295300 | -1.54317200 | H | -0.10491800 | -8.93591600  | -5.58422200 |
| H  | -1.34930000 | -8.69429300 | 1.76448300  | H | -0.07408200 | -7.33789300  | -3.48752500 |
| N  | 0.85706900  | -4.75960400 | -2.07113900 | H | 0.60598000  | -15.36123400 | -0.05231600 |
| N  | -0.50846000 | -6.32064000 | -0.43211300 |   |             |              |             |

**DTSN-N-4F (Quintet)**

E(BS1) = -5954.501296

E(BS2) = -5958.021331

ZPE = 1.007797

H = 1.087554

G = 0.890155

$\langle S^2 \rangle = 6.0324$

330.8124i

N -0.46657700 -0.71311900 -1.01933700  
S 0.51127000 -0.81829900 0.30990700  
S 0.12374700 -0.12409900 -2.43636800  
C 1.05847400 0.86087300 0.65184000  
O 1.72602300 -1.63329400 0.11613700  
O -0.38336600 -1.18988800 1.42478200  
C -0.06249200 1.66344600 -2.32821200  
O -0.82670000 -0.55052400 -3.48478900  
O 1.55875900 -0.39578900 -2.66344100  
C 0.10170000 1.81480400 1.01086200  
C 2.40986500 1.18626200 0.55435200  
C -1.35381600 2.18839600 -2.24270200  
C 1.05856500 2.48938800 -2.32063300  
C 0.51284300 3.11912400 1.27390400  
H -0.94467400 1.53512600 1.07218800  
C 2.81284500 2.49611700 0.82693400  
H 3.12185500 0.42193600 0.26517700  
C -1.52216300 3.56678700 -2.13586500  
H -2.20802300 1.52495100 -2.26566500  
C 0.88057400 3.87067000 -2.21179800  
H 2.04704900 2.05076900 -2.38261800  
C 1.86726100 3.45917800 1.18349000  
H -0.22102900 3.87241100 1.54315200  
H 3.86297100 2.76266300 0.75493000  
C -0.40430100 4.40849400 -2.11696800  
H -2.52317100 3.98292000 -2.06863800  
H 1.74799900 4.52310600 -2.19212900  
H 2.18273700 4.47816900 1.38706000  
H -0.53655800 5.48278700 -2.02835300  
Cu -2.21145400 -2.40742400 -1.12164300  
C -4.61559300 0.32814100 -3.48625300  
C -4.95809400 1.25055500 -2.50602700  
C -4.62548900 0.98974400 -1.17811000  
C -3.92938700 -0.18102400 -0.87934600  
C -3.91674200 -0.83697100 -3.13751600  
C -3.63152300 -0.60878300 0.50857400  
C -3.94618100 0.15006000 1.63351000  
C -3.76671200 -0.42354200 2.89265500  
H -4.00776800 0.14264400 3.78657800  
C -3.30749200 -1.72959200 2.98854600  
C -2.96177000 -2.43426200 1.82615500  
H -4.88662400 0.49046500 -4.52292500  
H -5.49427000 2.15743900 -2.76578500  
H -3.19518400 -2.21230200 3.95285400  
N -3.56306700 -1.05104100 -1.85393000  
N -3.10769200 -1.85041200 0.62418100  
C -2.42759800 -3.83278800 1.89077400  
H -1.33596100 -3.79270600 1.90763400  
H -2.78736000 -4.33349000 2.79310800  
H -2.70833900 -4.38725200 0.99423500  
C -3.56807400 -1.86945900 -4.16444700  
H -2.48652500 -1.89315100 -4.29859900  
H -3.86303300 -2.86252300 -3.81856300

H -4.06209400 -1.64692900 -5.11209500  
H -4.33903800 1.15419800 1.54123500  
H -4.91641100 1.67962600 -0.39708600  
F -2.99743000 -4.77747900 -1.15470600  
F -1.61781900 -3.30008700 -2.74892400  
Cu -1.18818800 -4.91572200 -1.76560600  
C 2.77351300 -3.60793300 -2.84632700  
C 3.45547800 -3.95414200 -1.69217400  
C 2.83118000 -4.75635200 -0.73611500  
C 1.52143200 -5.15661200 -0.95977500  
C 1.44388100 -4.02369400 -3.02559200  
C 0.77688500 -6.08607600 -0.08663800  
C 1.34409500 -6.77442500 0.98526500  
C 0.56309200 -7.69774400 1.67660400  
H 0.98421300 -8.24149800 2.51602200  
C -0.74258300 -7.94769800 1.26397300  
C -1.26885200 -7.24534200 0.17300300  
H 3.24328300 -3.01799700 -3.62316100  
H 4.47713500 -3.62346100 -1.53809700  
H -1.35523400 -8.69276700 1.75859100  
N 0.85922400 -4.75702300 -2.07104800  
N -0.50919400 -6.31916200 -0.43600500  
C -2.62920200 -7.52110100 -0.39133200  
H -3.30726200 -6.69820500 -0.15916700  
H -2.55079900 -7.55281300 -1.48121500  
H -3.02233900 -8.46381000 -0.00743200  
C 0.67475000 -3.68429600 -4.26542800  
H 0.21847000 -2.69676100 -4.16098500  
H 1.35542100 -3.69194600 -5.11831700  
H -0.11508000 -4.41850100 -4.41932900  
H 2.37955900 -6.61592000 1.25471000  
H 3.36288400 -5.06991800 0.15213100  
F -0.85323700 -3.57630100 -0.36606500  
F -1.51095600 -6.09783900 -3.15552400  
N 2.15244100 -7.75061600 -3.88841100  
S 3.44883900 -8.13221100 -2.89195000  
S 2.33848300 -6.85592700 -5.30650500  
C 3.48461500 -9.92687700 -2.90987500  
O 4.69489400 -7.64226400 -3.50696900  
O 3.14149600 -7.71384000 -1.51647300  
C 3.22231100 -7.90764900 -6.46282500  
O 0.96293400 -6.69948300 -5.80503200  
O 3.15914400 -5.66078900 -5.08131600  
C 3.47272400 -10.61048100 -4.12787100  
C 3.59463000 -10.60275700 -1.69325500  
C 2.49512700 -8.79451100 -7.26174800  
C 4.61680400 -7.84827000 -6.51438600  
C 3.56160500 -12.00205600 -4.11928000  
H 3.38121100 -10.07282100 -5.06293200  
C 3.68737300 -11.99456600 -1.69976200  
H 3.58256000 -10.04427400 -0.76478200  
C 3.18605000 -9.65979300 -8.10998200  
H 1.41305900 -8.79927200 -7.22545500  
C 5.29433500 -8.71953500 -7.36805300  
H 5.14911400 -7.14784400 -5.88479100  
C 3.66819500 -12.69290700 -2.90893900  
H 3.54070100 -12.54443000 -5.05928800  
H 3.75049600 -12.53281000 -0.76000500  
C 4.58309100 -9.62767900 -8.15689100  
H 2.63368100 -10.35343800 -8.73591700  
H 6.37821900 -8.68840500 -7.41491500

|                                |             |              |             |
|--------------------------------|-------------|--------------|-------------|
| H                              | 3.72279900  | -13.77680100 | -2.90746100 |
| H                              | 5.11690000  | -10.30607000 | -8.81533000 |
| C                              | 0.25735800  | -12.01274300 | -2.03315000 |
| C                              | 0.17486900  | -10.77702900 | -2.77479400 |
| C                              | 0.40050900  | -12.01720000 | -0.62528500 |
| C                              | 0.23110200  | -13.25977100 | -2.70212000 |
| C                              | 0.01305200  | -10.59848100 | -4.16603500 |
| S                              | 0.30197400  | -9.20608700  | -1.97820100 |
| C                              | 0.52045600  | -13.21040700 | 0.07672800  |
| H                              | 0.42881500  | -11.07890000 | -0.07932900 |
| C                              | 0.35303100  | -14.44907000 | -1.99407300 |
| H                              | 0.13338200  | -13.29570700 | -3.78098600 |
| C                              | 0.04297000  | -9.28490000  | -4.57574700 |
| H                              | -0.13472400 | -11.42582700 | -4.84875700 |
| C                              | 0.34756000  | -8.34342200  | -3.51827600 |
| C                              | 0.50110500  | -14.43361700 | -0.60238700 |
| H                              | 0.63323900  | -13.18844700 | 1.15624600  |
| H                              | 0.33772400  | -15.39381500 | -2.52877700 |
| H                              | -0.09959600 | -8.94168300  | -5.58933400 |
| H                              | -0.07832800 | -7.34287800  | -3.49272600 |
| H                              | 0.59984500  | -15.36485300 | -0.05338500 |
| <b>D7-N-4F (Quintet)</b>       |             |              |             |
| E(BS1) = -5954.510308          |             |              |             |
| E(BS2) = -5958.029236          |             |              |             |
| ZPE = 1.009178                 |             |              |             |
| H = 1.089112                   |             |              |             |
| G = 0.890516                   |             |              |             |
| $\langle S^2 \rangle = 6.0389$ |             |              |             |
| N                              | -0.39779100 | -0.78211500  | -0.99364100 |
| S                              | 0.52143500  | -0.88320300  | 0.37808700  |
| S                              | 0.26075800  | -0.15254800  | -2.36266200 |
| C                              | 1.01480600  | 0.80419300   | 0.75869400  |
| O                              | 1.76045800  | -1.66887100  | 0.22283300  |
| O                              | -0.40993800 | -1.28883400  | 1.44956000  |
| C                              | -0.01266900 | 1.62398400   | -2.25502900 |
| O                              | -0.59435200 | -0.61066600  | -3.47845700 |
| O                              | 1.71986400  | -0.35715200  | -2.48378800 |
| C                              | 0.02436300  | 1.72863400   | 1.10340300  |
| C                              | 2.35872500  | 1.16673400   | 0.69534900  |
| C                              | -1.32894000 | 2.08993700   | -2.23869800 |
| C                              | 1.06746100  | 2.50013700   | -2.18518900 |
| C                              | 0.39423700  | 3.04088500   | 1.38819200  |
| H                              | -1.01534600 | 1.42080200   | 1.13823300  |
| C                              | 2.71977000  | 2.48417600   | 0.98889900  |
| H                              | 3.09736600  | 0.42527100   | 0.41425700  |
| C                              | -1.56605000 | 3.45844400   | -2.13648700 |
| H                              | -2.14910900 | 1.38916300   | -2.31143500 |
| C                              | 0.82069900  | 3.87129900   | -2.08174800 |
| H                              | 2.07699000  | 2.10802400   | -2.19402900 |
| C                              | 1.74063700  | 3.41809000   | 1.33237300  |
| H                              | -0.36571100 | 3.77148700   | 1.64749000  |
| H                              | 3.76363300  | 2.77953900   | 0.94300700  |
| C                              | -0.49047600 | 4.34997400   | -2.05431900 |
| H                              | -2.58732300 | 3.82779700   | -2.12233000 |
| H                              | 1.65524700  | 4.56222800   | -2.01347400 |
| H                              | 2.02365600  | 4.44318200   | 1.55231300  |
| H                              | -0.67617600 | 5.41663200   | -1.96963800 |
| Cu                             | -2.15987700 | -2.44019800  | -1.17528400 |
| C                              | -4.51744100 | 0.33300400   | -3.54975700 |
| C                              | -4.91093300 | 1.22296600   | -2.55862600 |
| C                              | -4.61017800 | 0.93754300   | -1.22856300 |
| C                              | -3.89728400 | -0.22484100  | -0.93623700 |
| C                              | -3.80307800 | -0.82493400  | -3.20839500 |
| C                              | -3.63059000 | -0.67463900  | 0.45088600  |
| C                              | -3.96775800 | 0.06877500   | 1.57966000  |
| C                              | -3.81782400 | -0.52431800  | 2.83365000  |
| H                              | -4.07562100 | 0.02945600   | 3.73066300  |
| C                              | -3.36649100 | -1.83369200  | 2.91931600  |
| C                              | -2.99620200 | -2.52191700  | 1.75449700  |
| H                              | -4.76046100 | 0.51505700   | -4.59005600 |
| H                              | -5.46109200 | 2.12307200   | -2.81253900 |
| H                              | -3.27833000 | -2.33178500  | 3.87831400  |
| N                              | -3.48421900 | -1.06461700  | -1.91924100 |
| N                              | -3.11104700 | -1.91872400  | 0.55846300  |
| C                              | -2.46978400 | -3.92356300  | 1.81146700  |
| H                              | -1.37858500 | -3.88883800  | 1.85110200  |
| H                              | -2.84981400 | -4.43350000  | 2.70023400  |
| H                              | -2.73549000 | -4.46618700  | 0.90323200  |
| C                              | -3.39907500 | -1.82070900  | -4.25094300 |
| H                              | -2.31208000 | -1.83805900  | -4.33159100 |
| H                              | -3.70670800 | -2.82574500  | -3.95454500 |
| H                              | -3.84539700 | -1.56650200  | -5.21404900 |
| H                              | -4.35322000 | 1.07636300   | 1.49384700  |
| H                              | -4.94049700 | 1.60057200   | -0.44008300 |
| F                              | -2.99247000 | -4.87019900  | -1.24054000 |
| F                              | -1.59675500 | -3.36965400  | -2.79204800 |
| Cu                             | -1.16887900 | -4.99163300  | -1.80494100 |
| C                              | 2.73989400  | -3.55551900  | -2.86103900 |
| C                              | 3.43024900  | -3.88972800  | -1.70825800 |
| C                              | 2.83713000  | -4.73516100  | -0.76992200 |
| C                              | 1.54376400  | -5.18328400  | -1.00337800 |
| C                              | 1.43412200  | -4.03315000  | -3.05806900 |
| C                              | 0.82710500  | -6.13142100  | -0.12680500 |
| C                              | 1.44728300  | -6.82799400  | 0.90989000  |
| C                              | 0.70497700  | -7.75789300  | 1.63268200  |
| H                              | 1.16655600  | -8.30669800  | 2.44712700  |
| C                              | -0.61858200 | -8.00010700  | 1.28310800  |
| C                              | -1.19735400 | -7.29730000  | 0.21761800  |
| H                              | 3.18435200  | -2.92720700  | -3.62266500 |
| H                              | 4.43286400  | -3.51166400  | -1.53922400 |
| H                              | -1.20934600 | -8.74359800  | 1.80584000  |
| N                              | 0.87259300  | -4.80032100  | -2.11449600 |
| N                              | -0.47325000 | -6.36518800  | -0.42728700 |
| C                              | -2.57176600 | -7.61944300  | -0.28261400 |
| H                              | -3.09380700 | -6.70495000  | -0.56596700 |
| H                              | -2.46993000 | -8.23820700  | -1.18224000 |
| H                              | -3.13574700 | -8.18032500  | 0.46497200  |
| C                              | 0.66918000  | -3.72324900  | -4.30816500 |
| H                              | 0.19176400  | -2.74505800  | -4.21455700 |
| H                              | 1.35940200  | -3.71884100  | -5.15359600 |
| H                              | -0.10082400 | -4.47767400  | -4.46388500 |
| H                              | 2.49384900  | -6.66743400  | 1.13051600  |
| H                              | 3.37445800  | -5.02933100  | 0.12149500  |
| F                              | -0.85261800 | -3.64081500  | -0.40723200 |
| F                              | -1.43931400 | -6.16164600  | -3.20945900 |
| N                              | 2.13983400  | -7.82748200  | -3.99170300 |
| S                              | 3.51724800  | -8.22395800  | -3.03844500 |
| S                              | 2.33605200  | -6.84394600  | -5.41377600 |
| C                              | 3.51564900  | -10.01121900 | -3.02066900 |
| O                              | 4.67116400  | -7.76689100  | -3.81985600 |
| O                              | 3.34594500  | -7.72301200  | -1.67253300 |

|                                       |             |              |             |    |             |             |             |
|---------------------------------------|-------------|--------------|-------------|----|-------------|-------------|-------------|
| C                                     | 3.24644100  | -7.84606600  | -6.58808000 | C  | -0.63130300 | 1.72854400  | -1.65993000 |
| O                                     | 0.96371600  | -6.69287200  | -5.90942700 | C  | 1.47611500  | 1.87533700  | -0.45898500 |
| O                                     | 3.13727100  | -5.66500300  | -5.08973800 | C  | -1.03720200 | 2.06640900  | 2.34580100  |
| C                                     | 3.53536800  | -10.69550400 | -4.23772600 | H  | -2.05672600 | 0.55639400  | 1.18280700  |
| C                                     | 3.54704900  | -10.67598400 | -1.79462700 | C  | 1.17625700  | 1.47235900  | 3.13574000  |
| C                                     | 2.54801300  | -8.78170000  | -7.35689700 | H  | 1.86868200  | -0.50275700 | 2.55881600  |
| C                                     | 4.62342400  | -7.65995200  | -6.72419300 | C  | -0.84359700 | 3.08961600  | -1.45433000 |
| C                                     | 3.57233600  | -12.08888100 | -4.21713100 | H  | -1.34988400 | 1.13443100  | -2.20432900 |
| H                                     | 3.51028500  | -10.15700200 | -5.17784100 | C  | 1.25479800  | 3.23922100  | -0.25490700 |
| C                                     | 3.58864800  | -12.06954800 | -1.79144600 | H  | 2.36058600  | 1.38421400  | -0.07212000 |
| H                                     | 3.50950800  | -10.10931500 | -0.87215800 | C  | 0.12921200  | 2.39129300  | 3.04750900  |
| C                                     | 3.25802900  | -9.57282100  | -8.25914600 | H  | -1.84585100 | 2.78692700  | 2.27052200  |
| H                                     | 1.47467000  | -8.88133100  | -7.26233000 | H  | 2.08267700  | 1.72779900  | 3.67634300  |
| C                                     | 5.31841500  | -8.45521500  | -7.63529000 | C  | 0.09861000  | 3.84585800  | -0.74949300 |
| H                                     | 5.12985600  | -6.92050200  | -6.11866400 | H  | -1.74326800 | 3.55721700  | -1.84351800 |
| C                                     | 3.59668500  | -12.77305700 | -2.99811200 | H  | 1.98374500  | 3.82360000  | 0.29804100  |
| H                                     | 3.57609200  | -12.63788700 | -5.15327000 | H  | 0.22175100  | 3.36475700  | 3.51990600  |
| H                                     | 3.58848600  | -12.60375200 | -0.84742500 | H  | -0.07007400 | 4.90602300  | -0.58498000 |
| C                                     | 4.64072400  | -9.41417400  | -8.39270400 | Cu | -1.98343900 | -2.67594600 | -1.88636200 |
| H                                     | 2.73008200  | -10.30526200 | -8.86104900 | C  | -3.14519600 | 0.86883500  | -4.19646400 |
| H                                     | 6.38955100  | -8.32532300  | -7.75051800 | C  | -3.93012900 | 1.52818400  | -3.26296900 |
| H                                     | 3.61265200  | -13.85829500 | -2.98875300 | C  | -4.19496900 | 0.90688800  | -2.04410500 |
| H                                     | 5.18899000  | -10.03374000 | -9.09558200 | C  | -3.65094300 | -0.35261700 | -1.79318700 |
| C                                     | 0.15453500  | -11.79798500 | -1.81923600 | C  | -2.60206400 | -0.39186200 | -3.89592500 |
| C                                     | 0.20073400  | -10.63594900 | -2.66817200 | C  | -3.99846600 | -1.12682000 | -0.57278100 |
| C                                     | 0.32244200  | -11.69281100 | -0.41584100 | C  | -4.72996200 | -0.58475100 | 0.48370000  |
| C                                     | -0.02224700 | -13.09437700 | -2.36399000 | C  | -5.14121000 | -1.43518500 | 1.50964200  |
| C                                     | 0.03302800  | -10.56296100 | -4.07465900 | H  | -5.71827600 | -1.04430000 | 2.34180100  |
| S                                     | 0.51920600  | -9.02604400  | -2.00828700 | C  | -4.82309600 | -2.78346800 | 1.44291100  |
| C                                     | 0.32231200  | -12.82298300 | 0.39395300  | C  | -4.03189900 | -3.26493900 | 0.38712100  |
| H                                     | 0.46435200  | -10.71704600 | 0.03971200  | H  | -2.93483900 | 1.31167900  | -5.16347300 |
| C                                     | -0.01941200 | -14.21890200 | -1.54788800 | H  | -4.34803600 | 2.50575200  | -3.48072500 |
| H                                     | -0.14293600 | -13.21954300 | -3.43439700 | H  | -5.15580300 | -3.47252400 | 2.21144700  |
| C                                     | 0.23021900  | -9.33009100  | -4.62260600 | N  | -2.84632000 | -0.97006400 | -2.69952400 |
| H                                     | -0.24200900 | -11.42795200 | -4.66740200 | N  | -3.62768100 | -2.42576000 | -0.58356000 |
| C                                     | 0.70035600  | -8.26656600  | -3.67253600 | C  | -3.61289700 | -4.70360900 | 0.34573900  |
| C                                     | 0.15491900  | -14.09517500 | -0.16371700 | H  | -2.64270700 | -4.79724000 | 0.84093000  |
| H                                     | 0.45661200  | -12.71232900 | 1.46611900  | H  | -4.34364400 | -5.31901500 | 0.87911700  |
| H                                     | -0.14929900 | -15.20119700 | -1.99288900 | H  | -3.46200600 | -5.07474500 | -0.67064900 |
| H                                     | 0.09217300  | -9.08723500  | -5.66585200 | C  | -1.73767300 | -1.08465100 | -4.90637400 |
| H                                     | 0.09136700  | -7.35921400  | -3.67147600 | H  | -0.72513500 | -0.67588800 | -4.84608100 |
| H                                     | 0.15966500  | -14.97701900 | 0.46940500  | H  | -1.67132000 | -2.15079900 | -4.69333800 |
| <b>D8-N-3F (Constrained, Triplet)</b> |             |              |             | H  | -2.12664300 | -0.90298900 | -5.91239200 |
| E(BS1) = -5954.565310                 |             |              |             | H  | -4.98731600 | 0.46614700  | 0.51135400  |
| E(BS2) = -5958.079056                 |             |              |             | H  | -4.83974000 | 1.38689400  | -1.32034100 |
| ZPE = 1.009974                        |             |              |             | F  | -2.64131600 | -6.10123400 | -2.38997900 |
| H = 1.089926                          |             |              |             | F  | -1.47353500 | -3.59858100 | -3.46698900 |
| G = 0.891241                          |             |              |             | Cu | -0.86441700 | -5.50714200 | -2.36908500 |
| $\langle S^2 \rangle = 2.0039$        |             |              |             | C  | 3.24006200  | -3.89986300 | -2.48247700 |
| N                                     | -0.44996700 | -1.37225200  | -0.57789400 | C  | 3.70281500  | -4.14991400 | -1.19690300 |
| S                                     | -0.27400200 | -1.69433400  | 1.03264100  | C  | 2.84681800  | -4.74542500 | -0.27333900 |
| S                                     | 0.76995300  | -0.63702400  | -1.40251000 | C  | 1.55357600  | -5.08445100 | -0.67393800 |
| C                                     | -0.10447300 | -0.08920200  | 1.82922000  | C  | 1.92668200  | -4.24879300 | -2.82778500 |
| O                                     | 0.94298900  | -2.46111600  | 1.36755900  | C  | 0.63339600  | -5.80571100 | 0.24653800  |
| O                                     | -1.56548700 | -2.24498700  | 1.48216500  | C  | 0.63577200  | -5.57797500 | 1.62595600  |
| C                                     | 0.52665400  | 1.13239300   | -1.15799100 | C  | -0.24552300 | -6.31694200 | 2.41180200  |
| O                                     | 0.48677900  | -0.90228500  | -2.82870900 | H  | -0.27930900 | -6.16242600 | 3.48618400  |
| O                                     | 2.12412100  | -0.94384900  | -0.89875800 | C  | -1.09905200 | -7.23697900 | 1.80564500  |
| C                                     | -1.16133400 | 0.82090500   | 1.73506000  | C  | -1.05993400 | -7.38809800 | 0.41349600  |
| C                                     | 1.06485500  | 0.22327500   | 2.51976600  | H  | 3.87652600  | -3.43120900 | -3.22453100 |
|                                       |             |              |             | H  | 4.71785100  | -3.88806900 | -0.91511800 |

H -1.80237500 -7.81777800 2.39333600  
N 1.11751500 -4.84777200 -1.93136900  
N -0.19100900 -6.69047200 -0.33533700  
C -1.99641500 -8.28921800 -0.34012600  
H -2.46180400 -7.68951100 -1.13273600  
H -1.44001200 -9.10373900 -0.81693800  
H -2.75499800 -8.72556400 0.31483900  
C 1.36302900 -3.95821800 -4.18396900  
H 0.62120900 -3.16163600 -4.08460400  
H 2.14901000 -3.66009000 -4.88152500  
H 0.83676000 -4.83606200 -4.56076400  
H 1.25937900 -4.80370400 2.05215800  
H 3.17824200 -4.96385300 0.73466300  
F -1.28184800 -4.14558100 -0.95415500  
F -0.32649100 -6.63182400 -3.81815900  
N 2.90424400 -7.60578100 -5.33285400  
S 4.53143300 -8.23239900 -5.26472500  
S 2.31243100 -6.81504900 -6.79322800  
C 4.25000200 -9.95162300 -4.88750700  
O 5.07505400 -8.09474000 -6.61393000  
O 5.19977800 -7.59811300 -4.12780900  
C 2.20210300 -8.14900000 -7.97539300  
O 0.95720600 -6.40122600 -6.44029500  
O 3.32454300 -5.85011600 -7.20606000  
C 3.70430100 -10.77207600 -5.88189400  
C 4.53897600 -10.42017500 -3.60543000  
C 1.06694000 -8.96590600 -7.93449700  
C 3.24262100 -8.36291100 -8.88019600  
C 3.41655600 -12.09705200 -5.56127800  
H 3.50701900 -10.38378700 -6.87518700  
C 4.24339600 -11.74949900 -3.30278100  
H 4.96600000 -9.75312200 -2.86616900  
C 0.99880200 -10.05467200 -8.80218700  
H 0.25143900 -8.74194200 -7.25578100  
C 3.15392100 -9.45407800 -9.74588300  
H 4.10042500 -7.70382400 -8.88684500  
C 3.67755400 -12.57999600 -4.27423500  
H 2.98689600 -12.74920000 -6.31424900  
H 4.45252600 -12.13313900 -2.30981000  
C 2.04396800 -10.30225200 -9.69834700  
H 0.12809700 -10.70161300 -8.78387200  
H 3.95419200 -9.64109100 -10.45414700  
H 3.44352000 -13.61132600 -4.03010200  
H 1.98711500 -11.15329600 -10.36962700  
C 1.72199000 -9.35249300 -0.57014500  
C 1.77506900 -9.03765600 -1.98164200  
C 2.41696700 -8.56557200 0.37776900  
C 0.94226700 -10.43867600 -0.11074300  
C 1.20474300 -9.83850100 -3.03085500  
S 2.52763700 -7.62633100 -2.56618200  
C 2.32076700 -8.84353300 1.73169300  
H 3.02167900 -7.72537900 0.05281500  
C 0.85053800 -10.71207600 1.24844600  
H 0.38756600 -11.05465800 -0.80765000  
C 1.36772700 -9.31035600 -4.26520900  
H 0.71595800 -10.78363900 -2.84256900  
C 1.94939800 -7.94455900 -4.29445600  
C 1.53379600 -9.91515900 2.17138500  
H 2.84702200 -8.22209200 2.44759600  
H 0.23886100 -11.54028300 1.58957100  
H 1.02447600 -9.77382900 -5.18156700

H 1.08429400 -7.27875500 -4.31959700  
H 1.45305400 -10.12611200 3.23298100

**D9-N-3F (Triplet)**

E(BS1) = -5954.620062  
E(BS2) = -5958.131933  
ZPE = 1.008872  
H = 1.089489  
G = 0.893722  
<S<sup>2</sup>> = 2.0038  
N -0.57330900 -1.34191300 -0.24731400  
S -0.92480100 -1.32115400 1.38395900  
S 0.91978300 -0.86096800 -0.76326000  
C -0.64065800 0.38274200 1.87731900  
O -0.03370200 -2.16315700 2.20213700  
O -2.37605600 -1.55852700 1.47326400  
C 0.78389800 0.91638600 -1.02219500  
O 1.07457200 -1.47439900 -2.10013800  
O 1.99783500 -1.06162800 0.22387500  
C -1.49484300 1.37123200 1.38092300  
C 0.43194200 0.69344300 2.71099000  
C -0.23813700 1.40675200 -1.83755200  
C 1.70446400 1.77244900 -0.42142300  
C -1.26237100 2.69968800 1.72944700  
H -2.31501400 1.09835600 0.72542800  
C 0.65112300 2.02796700 3.05970000  
H 1.07917000 -0.10017800 3.06468600  
C -0.33670600 2.77848000 -2.05568600  
H -0.95182300 0.72676100 -2.27846200  
C 1.59532500 3.14757000 -0.64283400  
H 2.47762500 1.36517900 0.21888600  
C -0.19140200 3.02705300 2.56818400  
H -1.90989600 3.48033700 1.34267000  
H 1.48283300 2.28578500 3.70823900  
C 0.57994200 3.65035100 -1.45820800  
H -1.13109400 3.16507900 -2.68713900  
H 2.30160500 3.82379600 -0.17108100  
H -0.01217000 4.06465800 2.83373900  
H 0.49818100 4.72032400 -1.62467100  
Cu -1.60459200 -2.84582100 -1.49225600  
C -1.95833700 0.01703900 -4.78367400  
C -2.97652600 0.82757800 -4.30427000  
C -3.64427600 0.45551100 -3.13863500  
C -3.24318900 -0.69870100 -2.46566300  
C -1.58280600 -1.13152100 -4.06958100  
C -3.99612400 -1.23068800 -1.29945000  
C -4.96797500 -0.49228400 -0.62268200  
C -5.70854500 -1.13285400 0.36989600  
H -6.47744000 -0.58995000 0.91083600  
C -5.46024100 -2.47000600 0.65046000  
C -4.43109200 -3.14233500 -0.02715900  
H -1.44361200 0.25201100 -5.70864100  
H -3.27213300 1.72253300 -4.84222000  
H -6.03672300 -2.99681400 1.40330400  
N -2.19498400 -1.44517800 -2.90833300  
N -3.72416700 -2.51233900 -0.97991100  
C -4.07251300 -4.55952600 0.30480600  
H -3.21949200 -4.54881100 0.98804700  
H -4.91522900 -5.06829800 0.78123000  
H -3.73545100 -5.11467800 -0.57445600  
C -0.50185000 -2.02275700 -4.60299700

|    |             |              |             |           |              |              |              |
|----|-------------|--------------|-------------|-----------|--------------|--------------|--------------|
| H  | 0.47549300  | -1.57845100  | -4.39956900 | H         | -0.12833200  | -10.63339400 | -8.65333300  |
| H  | -0.54490400 | -3.00038800  | -4.12661000 | H         | 2.12348500   | -7.71605100  | -10.88455700 |
| H  | -0.61367600 | -2.12736000  | -5.68630200 | H         | 3.88582300   | -13.71817300 | -7.23915600  |
| H  | -5.15048600 | 0.54940000   | -0.85562900 | H         | 0.80115000   | -9.81559000  | -10.80626800 |
| H  | -4.48538100 | 1.03606300   | -2.78366400 | C         | 2.40431300   | -8.92256400  | -0.10111800  |
| F  | -2.57960200 | -6.40267800  | -1.83831600 | C         | 2.43582100   | -8.98810100  | -1.56697400  |
| F  | -1.10805500 | -4.32709800  | -2.73433400 | C         | 3.34630000   | -8.17174900  | 0.62434800   |
| Cu | -0.87514800 | -5.83149900  | -1.43456800 | C         | 1.40049700   | -9.60793000  | 0.60852600   |
| C  | 3.10159200  | -4.06588200  | -1.11603300 | C         | 1.93600500   | -9.98610000  | -2.38436300  |
| C  | 3.30012400  | -4.13864300  | 0.25281200  | S         | 3.10923400   | -7.69144500  | -2.51282800  |
| C  | 2.35686900  | -4.79669500  | 1.03946300  | C         | 3.28592200   | -8.10810200  | 2.01499900   |
| C  | 1.22792600  | -5.33453700  | 0.42820900  | H         | 4.13346000   | -7.63821000  | 0.09985900   |
| C  | 1.95242200  | -4.63396700  | -1.68440200 | C         | 1.34763500   | -9.54882100  | 1.99857500   |
| C  | 0.20234200  | -6.08899300  | 1.18734100  | H         | 0.64208200   | -10.16119000 | 0.06478300   |
| C  | 0.12586100  | -6.06272700  | 2.58072500  | C         | 2.08067300   | -9.71481800  | -3.76545100  |
| C  | -0.83059400 | -6.85237500  | 3.21193300  | H         | 1.48657600   | -10.89209900 | -1.99703600  |
| H  | -0.92067600 | -6.83960400  | 4.29351400  | C         | 2.69623900   | -8.50642600  | -4.00365000  |
| C  | -1.65410100 | -7.66809700  | 2.44398200  | C         | 2.28762700   | -8.79604700  | 2.70808000   |
| C  | -1.54318400 | -7.64124500  | 1.04801000  | H         | 4.01906900   | -7.51789500  | 2.55630100   |
| H  | 3.81550400  | -3.56698100  | -1.76144500 | H         | 0.55525800   | -10.06908400 | 2.52720200   |
| H  | 4.18094100  | -3.69882100  | 0.70846900  | H         | 1.75323100   | -10.37240200 | -4.56177900  |
| H  | -2.38747000 | -8.31828700  | 2.90817700  | H         | 0.19383500   | -7.39463000  | -3.67288300  |
| N  | 1.03976300  | -5.24635300  | -0.91148200 | H         | 2.23541000   | -8.73866600  | 3.79087500   |
| N  | -0.64778500 | -6.83464300  | 0.44756300  |           |              |              |              |
| C  | -2.38414400 | -8.51565200  | 0.16646900  | <b>I'</b> |              |              |              |
| H  | -2.75994900 | -7.91219100  | -0.66541500 | E(BS1) =  | -2398.742905 |              |              |
| H  | -1.75999400 | -9.31303400  | -0.25527600 | E(BS2) =  | -2399.112425 |              |              |
| H  | -3.20129700 | -8.97625600  | 0.72606800  | ZPE =     | 0.346208     |              |              |
| C  | 1.74490200  | -4.55649300  | -3.16560500 | H =       | 0.373233     |              |              |
| H  | 1.51939200  | -3.52302300  | -3.43208500 | G =       | 0.288750     |              |              |
| H  | 2.65633400  | -4.85184000  | -3.69221900 | C         | 3.60691800   | -3.76505800  | -1.42400300  |
| H  | 0.91830500  | -5.17827800  | -3.49248800 | C         | 2.44866200   | -4.32783800  | -1.92409700  |
| H  | 0.77722000  | -5.42197100  | 3.16004400  | C         | 1.40723800   | -3.39257900  | -2.14435800  |
| H  | 2.51052900  | -4.90110900  | 2.10500000  | C         | 1.77115100   | -2.10879400  | -1.81979300  |
| F  | -1.31950900 | -4.06495900  | -0.13066100 | S         | 3.42307600   | -2.03561800  | -1.23229300  |
| F  | -0.10936000 | -7.59696500  | -2.79298000 | H         | 2.34396100   | -5.39171000  | -2.09785400  |
| N  | 2.98259900  | -7.92231800  | -5.24625400 | H         | 0.41931400   | -3.64112200  | -2.51194100  |
| S  | 4.52146000  | -8.26823600  | -5.99247800 | C         | 4.86343100   | -4.44845200  | -1.08975900  |
| S  | 1.77620300  | -6.96005400  | -6.06504200 | C         | 5.72684200   | -3.95762500  | -0.09367600  |
| C  | 4.37341000  | -9.99375600  | -6.40787700 | C         | 5.22238100   | -5.62819800  | -1.76825900  |
| O  | 4.55965400  | -7.46234800  | -7.21304200 | C         | 6.91013900   | -4.62610500  | 0.21436300   |
| O  | 5.52331700  | -8.11619200  | -4.93863900 | H         | 5.46061600   | -3.05992000  | 0.45666400   |
| C  | 1.43864100  | -7.83489700  | -7.57578000 | C         | 6.40105600   | -6.29923000  | -1.45034100  |
| O  | 0.58357600  | -7.09259700  | -5.20239200 | H         | 4.58476000   | -6.00689700  | -2.56056700  |
| O  | 2.31525600  | -5.63517800  | -6.35135100 | C         | 7.25119000   | -5.80112400  | -0.45947200  |
| C  | 3.84310200  | -10.34260900 | -7.65255600 | H         | 7.56176200   | -4.23267500  | 0.98859500   |
| C  | 4.73945800  | -10.95027100 | -5.45660800 | H         | 6.66199900   | -7.20679900  | -1.98631700  |
| C  | 0.68074200  | -9.00771500  | -7.50642600 | H         | 8.17193800   | -6.32255500  | -0.21675100  |
| C  | 1.96379800  | -7.34800400  | -8.77350400 | N         | 0.98489600   | -0.95255900  | -1.89715200  |
| C  | 3.67116500  | -11.69473100 | -7.94495500 | S         | -0.14247200  | -0.59020000  | -0.60033200  |
| H  | 3.57751700  | -9.57853000  | -8.37295500 | S         | 0.95913000   | -0.06517600  | -3.39040400  |
| C  | 4.56063000  | -12.29789700 | -5.76763600 | C         | 0.60474200   | 0.80613200   | 0.21764300   |
| H  | 5.15513000  | -10.64290900 | -4.50427700 | O         | -0.06236700  | -1.75747200  | 0.27812200   |
| C  | 0.45462100  | -9.71909800  | -8.68292200 | O         | -1.41448200  | -0.18994100  | -1.20438500  |
| H  | 0.27629500  | -9.34874800  | -6.56008700 | C         | -0.15186700  | -1.00177800  | -4.42352100  |
| C  | 1.72404500  | -8.07294700  | -9.94119200 | O         | 2.31468000   | -0.17997100  | -3.92977900  |
| H  | 2.55578600  | -6.44162000  | -8.77878700 | O         | 0.37676600   | 1.24117800   | -3.08260400  |
| C  | 4.02478900  | -12.66732500 | -7.00505600 | C         | 0.18799700   | 2.09576300   | -0.11432300  |
| H  | 3.26022500  | -11.98472400 | -8.90633400 | C         | 1.60824500   | 0.56190000   | 1.15929300   |
| H  | 4.83884800  | -13.05666600 | -5.04369200 | C         | -1.52358500  | -0.75061100  | -4.33998800  |
| C  | 0.97787400  | -9.25460800  | -9.89406900 | C         | 0.37797500   | -1.99435800  | -5.25176600  |

C 0.80118900 3.17370000 0.52329900  
H -0.58476800 2.24220500 -0.85804300  
C 2.21272500 1.65240800 1.78232100  
H 1.89826500 -0.45405900 1.40160100  
C -2.38580800 -1.52147100 -5.11767800  
H -1.89685500 0.01820300 -3.67502700  
C -0.50131600 -2.75733900 -6.01994400  
H 1.44865600 -2.15476100 -5.29530000  
C 1.81036900 2.95290100 1.46439000  
H 0.49076100 4.18518300 0.28299400  
H 2.99297600 1.48555000 2.51750900  
C -1.87687300 -2.52188600 -5.95150500  
H -3.45471800 -1.34107900 -5.07179700  
H -0.11067400 -3.53183300 -6.67164200  
H 2.28451200 3.79773800 1.95385700  
H -2.55588500 -3.11919800 -6.55180500

#### HF

E(BS1) = -100.432113  
E(BS2) = -100.4877494  
ZPE = 0.009233  
H = 0.012538  
G = -0.004167  
F -0.33936500 0.64131700 0.00000000  
H -1.26708200 0.64131700 0.00000000

#### Benzene

E(BS1) = -232.265455  
E(BS2) = -232.318802  
ZPE = 0.100593  
H = 0.105928  
G = 0.076145  
C -0.08156700 0.14130100 0.00005900  
C 1.31594100 0.14123100 0.00050500  
C 2.01475900 1.35145900 -0.00004700  
C 1.31606200 2.56175900 -0.00104400  
C -0.08144500 2.56182800 -0.00149000  
C -0.78026400 1.35159900 -0.00093800  
H -0.62479100 -0.79942900 0.00048900  
H 1.85907100 -0.79955300 0.00128100  
H 3.10106800 1.35140000 0.00029700  
H 1.85927900 3.50249300 -0.00147400  
H -0.62456800 3.50261600 -0.00226600  
H -1.86657200 1.35165000 -0.00128300

#### D5-N-4F (Benzene, Triplet)

E(BS1) = -5402.655816  
E(BS2) = -5406.109608  
ZPE = 0.960141  
H = 1.036911  
G = 0.844299  
<S<sup>2</sup>> = 3.0051  
N -0.17270900 -1.25598600 -1.27886500  
S 0.44016600 -0.29289900 -0.07813700  
S 0.10345400 -0.89218000 -2.85747700  
C -0.15585100 1.36724600 -0.42908900  
O 1.91344000 -0.22246800 -0.05606000  
O -0.24315300 -0.72789000 1.15650300  
C -1.20666300 0.25196000 -3.32143500  
O -0.16888400 -2.13903000 -3.60474500  
O 1.38502200 -0.20180000 -3.11534500

C -1.52359900 1.62792500 -0.30706700  
C 0.74225500 2.35536700 -0.82841100  
C -2.53223700 -0.17237000 -3.20711900  
C -0.89068200 1.52602500 -3.78607300  
C -1.99597700 2.90641800 -0.59417800  
H -2.19974700 0.83694700 -0.00091200  
C 0.25865400 3.63582500 -1.10791700  
H 1.79468300 2.11341400 -0.91863700  
C -3.55890100 0.70111700 -3.55690700  
H -2.75273900 -1.16812700 -2.84813300  
C -1.92696600 2.39667200 -4.13237800  
H 0.14707600 1.82913100 -3.85283700  
C -1.10565000 3.90942700 -0.99277800  
H -3.05727400 3.11997000 -0.51423800  
H 0.94712000 4.41559300 -1.41926000  
C -3.25668300 1.98742000 -4.01807500  
H -4.59236000 0.37875600 -3.46947600  
H -1.69211300 3.39693100 -4.48290500  
H -1.47900900 4.90402900 -1.21791900  
H -4.05857100 2.66929100 -4.28523800  
Cu -0.45176100 -3.53323100 -0.67710300  
C -3.70794900 -3.82749600 -3.54270500  
C -4.70475500 -3.17237000 -2.83775600  
C -4.46306800 -2.79247800 -1.51769500  
C -3.21635800 -3.05927200 -0.95671600  
C -2.46578600 -4.08145500 -2.93719100  
C -2.90715500 -2.77451600 0.46511200  
C -3.78967600 -2.12059000 1.32252000  
C -3.45876000 -2.03038700 2.67408900  
H -4.12880000 -1.52963700 3.36549300  
C -2.28205900 -2.60902500 3.12701900  
C -1.40522300 -3.21692000 2.21607100  
H -3.86864700 -4.16002700 -4.56208700  
H -5.66645800 -2.96896800 -3.29706000  
H -2.01799700 -2.58590500 4.17835700  
N -2.23398800 -3.67214000 -1.67374000  
N -1.72705000 -3.26425100 0.91009700  
C -0.11191700 -3.81707700 2.67890600  
H 0.67689500 -3.06457500 2.60200700  
H -0.20122100 -4.13750600 3.72023100  
H 0.18335300 -4.64943600 2.03863400  
C -1.41906800 -4.83872600 -3.69839100  
H -1.09696500 -4.24562600 -4.55796200  
H -0.54631000 -5.04555900 -3.08501200  
H -1.85174700 -5.77338900 -4.07059300  
H -4.71845400 -1.70016700 0.95980900  
H -5.24038800 -2.31111900 -0.93980400  
F 0.79873400 -5.88319400 0.39783400  
F 0.80335400 -4.53755500 -1.80142700  
Cu 2.14313500 -4.80565400 -0.39319900  
C 4.21872200 -1.84879800 -2.79804500  
C 4.87156800 -1.13015000 -1.80981200  
C 4.81009200 -1.56913600 -0.48816200  
C 4.05835900 -2.70303700 -0.19740900  
C 3.49088800 -3.00113400 -2.46277800  
C 3.97294800 -3.29463500 1.15486100  
C 4.53115700 -2.69930600 2.28539200  
C 4.46053800 -3.37040200 3.50376400  
H 4.87469300 -2.91682700 4.39839400  
C 3.87813900 -4.62957800 3.55788200  
C 3.33315600 -5.19638200 2.39758700

H 4.26287700 -1.54282200 -3.83644500  
 H 5.43967100 -0.24023700 -2.06042700  
 H 3.84324600 -5.19228300 4.48367700  
 N 3.41303100 -3.37259900 -1.17744600  
 N 3.35687300 -4.49612700 1.25119100  
 C 2.79780500 -6.59380000 2.38551000  
 H 1.90108100 -6.64681000 1.76684200  
 H 3.56204300 -7.23588700 1.93668200  
 H 2.59660300 -6.94196200 3.40068800  
 C 2.82292900 -3.82825300 -3.51854200  
 H 1.78789600 -3.50172500 -3.64079000  
 H 3.35791000 -3.71053500 -4.46344600  
 H 2.82252700 -4.87654900 -3.22314500  
 H 5.00338400 -1.72812200 2.22098300  
 H 5.33957900 -1.03656800 0.29052700  
 F 1.15505500 -3.26274900 0.32363900  
 F 3.07584500 -6.20205000 -1.16605800  
 N 5.60199500 -6.90853500 -1.17380900  
 S 6.63164400 -6.29164700 0.06945700  
 S 5.67070900 -6.25936000 -2.77758500  
 C 7.27630600 -6.90343800 -3.20443500  
 O 4.64904000 -6.99187500 -3.52719500  
 O 5.70873400 -4.79576900 -2.79586600  
 C 7.73726500 -7.68606200 0.11547500  
 O 7.37608600 -5.08110000 -0.29967300  
 O 5.78397400 -6.28208300 1.26616600  
 C 7.41568000 -8.28622800 -3.38399000  
 C 8.67991900 -8.79416700 -3.66958600  
 C 9.77319000 -7.92807900 -3.77837700  
 C 8.35900200 -6.02436500 -3.29558400  
 C 9.61397300 -6.54965300 -3.59748400  
 H 6.55636200 -8.94016700 -3.28973700  
 H 8.81356300 -9.86232500 -3.80365500  
 H 10.75689700 -8.33044800 -3.99917700  
 H 8.21030000 -4.96451500 -3.12869900  
 H 10.46803800 -5.88622300 -3.68534200  
 C 9.08554800 -7.49326500 -0.19781100  
 C 9.93563400 -8.59696200 -0.17173700  
 C 9.43281900 -9.86250500 0.14833800  
 C 7.21342100 -8.94456600 0.43916800  
 C 8.07796900 -10.03575500 0.45112900  
 H 9.44583900 -6.50698500 -0.46302900  
 H 10.98631600 -8.47098100 -0.41110800  
 H 10.09955400 -10.71931500 0.15471900  
 H 6.15887200 -9.06853700 0.65546200  
 H 7.68616100 -11.01932800 0.68625400  
 C 3.59159400 -9.94918000 0.88482100  
 C 3.57747700 -9.23532600 -0.31661700  
 C 4.20841300 -9.77109400 -1.44563400  
 C 4.85525800 -11.00592400 -1.37155400  
 C 4.87951900 -11.71294600 -0.16358500  
 C 4.24598600 -11.18508400 0.96418000  
 H 3.10055200 -9.54218600 1.76415400  
 H 3.12301200 -8.25173300 -0.38454500  
 H 4.20802000 -9.20262800 -2.37014500  
 H 5.34895700 -11.41626000 -2.24868000  
 H 5.38913900 -12.67080900 -0.10313400  
 H 4.26156000 -11.73269900 1.90255800

**D5-N-4F (Benzene, Quintet)**

E(BS1) = -5402.656333

E(BS2) = -5406.108149  
 ZPE = 0.959761  
 H = 1.036636  
 G = 0.843878  
 <S<sup>2</sup>> = 6.0158  
 N -0.22390200 -1.20485500 -1.30769900  
 S 0.35605300 -0.12866400 -0.19349400  
 S 0.02575400 -0.95407000 -2.91288700  
 C -0.35081800 1.46528700 -0.63604400  
 O 1.82255500 0.03842200 -0.20933700  
 O -0.27040700 -0.52066400 1.08575500  
 C -1.32772600 0.10759200 -3.44683400  
 O -0.21139900 -2.25712600 -3.56901600  
 O 1.28118000 -0.24189000 -3.23600500  
 C -1.73140500 1.64382900 -0.51211600  
 C 0.47590500 2.48329500 -1.10753300  
 C -2.63536000 -0.36018100 -3.29917400  
 C -1.06358600 1.35906100 -3.99709700  
 C -2.28929600 2.86921200 -0.86879000  
 H -2.35139500 0.83059400 -0.15055500  
 C -0.09267000 3.71086600 -1.45599100  
 H 1.54050400 2.30348100 -1.19926500  
 C -3.69648900 0.44543500 -3.70464700  
 H -2.81408200 -1.33722900 -2.87127400  
 C -2.13410800 2.16180900 -4.39906600  
 H -0.03884400 1.69783800 -4.08915300  
 C -1.47061100 3.90209100 -1.33844300  
 H -3.36146300 3.01836800 -0.78709900  
 H 0.54026200 4.51295600 -1.82349600  
 C -3.44626900 1.70829700 -4.25373100  
 H -4.71626600 0.08880900 -3.59224100  
 H -1.93983100 3.14445800 -4.81779000  
 H -1.91056100 4.85499100 -1.61728400  
 H -4.27489800 2.33759900 -4.56484500  
 Cu -0.28915200 -3.49199300 -0.54245300  
 C -3.57996200 -4.11702800 -3.32536500  
 C -4.59043000 -3.45292500 -2.64873900  
 C -4.34407200 -2.97453200 -1.36157000  
 C -3.08021300 -3.15862800 -0.80604300  
 C -2.32081400 -4.28389300 -2.72421400  
 C -2.75837700 -2.77245300 0.58860700  
 C -3.65325100 -2.11294700 1.42875800  
 C -3.29849300 -1.92911200 2.76474100  
 H -3.97694200 -1.42048500 3.44205800  
 C -2.08738500 -2.42804900 3.22346300  
 C -1.20454200 -3.04912700 2.32833800  
 H -3.74285800 -4.52186200 -4.31800400  
 H -5.56533600 -3.31554700 -3.10483000  
 H -1.80423000 -2.33477500 4.26591800  
 N -2.08720500 -3.78405400 -1.49564400  
 N -1.54855000 -3.18002500 1.03441400  
 C 0.11711000 -3.58620800 2.79014100  
 H 0.88694200 -2.82307900 2.65543100  
 H 0.06207800 -3.85975600 3.84688300  
 H 0.41158500 -4.44108100 2.18051600  
 C -1.25761400 -5.06110600 -3.44141300  
 H -1.06408300 -4.60157000 -4.41393500  
 H -0.32674000 -5.08137100 -2.88196800  
 H -1.61649700 -6.08201300 -3.61408900  
 H -4.60938200 -1.76002700 1.06505400  
 H -5.12913900 -2.47989800 -0.80555200



F 0.82088000 -5.59020600 0.36698600  
 F 1.03192300 -4.23897500 -1.78612600  
 Cu 2.29094600 -4.58555200 -0.33583900  
 C 4.43431900 -1.50532100 -2.46420400  
 C 5.02152900 -0.83672800 -1.40210600  
 C 4.94197600 -1.37749400 -0.11855800  
 C 4.23564700 -2.56198700 0.06189600  
 C 3.73808500 -2.70369200 -2.23866600  
 C 4.13618400 -3.26799800 1.35839600  
 C 4.73923800 -2.81039400 2.52905800  
 C 4.63701900 -3.58262200 3.68430000  
 H 5.08740200 -3.23727400 4.60918600  
 C 3.97816700 -4.80364900 3.63556800  
 C 3.39828000 -5.23544800 2.43461900  
 H 4.49741800 -1.12047900 -3.47525500  
 H 5.55452200 0.09424600 -1.56534100  
 H 3.91389400 -5.44155300 4.50957700  
 N 3.63991500 -3.17136500 -0.98727400  
 N 3.45859100 -4.44003100 1.35371100  
 C 2.77750900 -6.59155900 2.30516000  
 H 1.87129000 -6.53703900 1.70142100  
 H 3.49414300 -7.23595400 1.78677700  
 H 2.56664900 -7.01746700 3.28812200  
 C 3.12543800 -3.47038800 -3.37012100  
 H 2.10877600 -3.11479200 -3.55332400  
 H 3.72812300 -3.32752100 -4.27005800  
 H 3.08115800 -4.52832200 -3.11809700  
 H 5.27817800 -1.87232700 2.54384900  
 H 5.42062300 -0.88055700 0.71488800  
 F 1.33589400 -3.02654200 0.39369900  
 F 3.17761700 -5.99079100 -1.14203900  
 N 5.65636900 -6.85032400 -1.14305600  
 S 6.69379400 -6.43894400 0.17662800  
 S 5.82625100 -6.05854800 -2.67381800  
 C 7.40723300 -6.75417200 -3.11009700  
 O 4.79771300 -6.65674100 -3.52612000  
 O 5.94162100 -4.60422300 -2.54452900  
 C 7.65800000 -7.93459000 0.13515400  
 O 7.56466300 -5.28193000 -0.06660600  
 O 5.80856200 -6.44134700 1.34627800  
 C 7.46425300 -8.11270900 -3.44931600  
 C 8.70444900 -8.67155900 -3.74553300  
 C 9.85585000 -7.87795100 -3.70473500  
 C 8.54792300 -5.94890000 -3.05166600  
 C 9.77862100 -6.52263600 -3.36457900  
 H 6.55957600 -8.70960700 -3.46845700  
 H 8.77398900 -9.72276000 -4.00424000  
 H 10.82064300 -8.31946100 -3.93412100  
 H 8.46135800 -4.90850200 -2.76325300  
 H 10.67749500 -5.91550400 -3.33805100  
 C 9.02929300 -7.85114200 -0.12246600  
 C 9.76773000 -9.03188700 -0.16661200  
 C 9.13433700 -10.26348900 0.03074800  
 C 7.00422700 -9.15769000 0.33602400  
 C 7.75914300 -10.32615600 0.28016300  
 H 9.49375500 -6.88733900 -0.29071100  
 H 10.83375700 -8.99112600 -0.36427100  
 H 9.71490300 -11.17966300 -0.01692100  
 H 5.93536300 -9.19431900 0.51139500  
 H 7.26638600 -11.28200800 0.41998800  
 C 3.29300200 -9.88956900 0.53412800

C 3.41286700 -9.08507800 -0.60244700  
 C 4.06376100 -9.58446900 -1.73684100  
 C 4.59515200 -10.87524900 -1.73248400  
 C 4.48226700 -11.67572400 -0.58961500  
 C 3.83064900 -11.18290100 0.54372900  
 H 2.78784500 -9.50860200 1.41735800  
 H 3.04668500 -8.06312400 -0.61052200  
 H 4.16837400 -8.94716900 -2.60931700  
 H 5.10444600 -11.25802300 -2.61308100  
 H 4.90066500 -12.67864400 -0.58366100  
 H 3.74135000 -11.80261900 1.43182300

**D6-N-4F (Benzene, Quintet)**

E(BS1) = -5402.659268

E(BS2) = -5406.112991

ZPE = 0.960255

H = 1.036716

G = 0.846150

$\langle S^2 \rangle = 6.0174$

N -0.12817700 -0.93478300 -1.23771000  
 S 0.92380000 -0.88852700 0.03573300  
 S 0.27601300 -0.25421800 -2.68003400  
 C 1.16981600 0.85461000 0.40488500  
 O 2.25219300 -1.46534300 -0.24843000  
 O 0.18107500 -1.44268300 1.18476400  
 C -0.18405100 1.48118900 -2.54805000  
 O -0.65232300 -0.83409400 -3.67341000  
 O 1.72058500 -0.28585800 -2.99100600  
 C 0.06524100 1.61259100 0.80549800  
 C 2.43913800 1.41872100 0.29586000  
 C -1.53994800 1.80319200 -2.46797100  
 C 0.79870800 2.46810400 -2.51699500  
 C 0.24216200 2.96284100 1.09619600  
 H -0.91327300 1.14954500 0.87725000  
 C 2.60681200 2.77325500 0.59577900  
 H 3.27069300 0.80102400 -0.02347600  
 C -1.91679600 3.13819000 -2.33974200  
 H -2.28177300 1.01854300 -2.51943000  
 C 0.41248900 3.80377900 -2.38652700  
 H 1.84282000 2.18714300 -2.57926200  
 C 1.51179600 3.54264200 0.99250000  
 H -0.60879000 3.56576100 1.39784600  
 H 3.59068900 3.22522800 0.51418400  
 C -0.93998600 4.13906500 -2.29543200  
 H -2.96989800 3.39648500 -2.27770100  
 H 1.17071700 4.57969300 -2.34895800  
 H 1.64413200 4.59660900 1.21808200  
 H -1.23437300 5.17921800 -2.19149300  
 Cu -1.77293600 -2.70611100 -1.17161600  
 C -4.65424200 -0.24217300 -3.30305100  
 C -5.00827700 0.64087300 -2.29119800  
 C -4.51987600 0.43175900 -1.00325300  
 C -3.66884300 -0.64905900 -0.77581600  
 C -3.79066500 -1.31338800 -3.02849100  
 C -3.20592500 -1.03371100 0.57900700  
 C -3.48157800 -0.29337300 1.72644900  
 C -3.14492600 -0.83977100 2.96542200  
 H -3.35134600 -0.28769400 3.87660200  
 C -2.57365300 -2.10321300 3.02090500  
 C -2.27069600 -2.78535900 1.83300000  
 H -5.04054200 -0.12091000 -4.30830200

H -5.67116300 1.47544300 -2.49464900  
H -2.33874800 -2.56786300 3.97190200  
N -3.29546200 -1.47779000 -1.78395300  
N -2.56760300 -2.22440900 0.64768700  
C -1.61242800 -4.13104800 1.85285700  
H -0.53373800 -3.99145200 1.75190600  
H -1.82823900 -4.64365100 2.79353100  
H -1.93448100 -4.72722800 0.99744800  
C -3.41576400 -2.29554600 -4.09437600  
H -2.36431300 -2.16242200 -4.35198600  
H -3.51707700 -3.31636000 -3.72259800  
H -4.04013900 -2.15477100 -4.97858400  
H -3.96082100 0.67522800 1.66754200  
H -4.81555100 1.08673000 -0.19455300  
F -2.39632100 -5.23151300 -1.09559000  
F -1.33052900 -3.62201500 -2.83352500  
Cu -0.66087900 -5.18362100 -1.89197200  
C 2.88234100 -3.38368200 -3.49035700  
C 3.72007200 -3.52864400 -2.39452300  
C 3.35348000 -4.38086200 -1.35266500  
C 2.11924200 -5.01459200 -1.41981200  
C 1.64313800 -4.04498600 -3.51283300  
C 1.63205700 -5.98874600 -0.42004200  
C 2.42884000 -6.48656700 0.61013000  
C 1.89491100 -7.43836600 1.47496900  
H 2.49659800 -7.83386800 2.28651900  
C 0.59552900 -7.89112200 1.27687600  
C -0.16683700 -7.37739400 0.21849000  
H 3.15442400 -2.75084700 -4.32644900  
H 4.66388900 -2.99541900 -2.35180500  
H 0.15894500 -8.64279400 1.92450400  
N 1.29133600 -4.80030700 -2.46583500  
N 0.36277100 -6.43550200 -0.58365700  
C -1.54638300 -7.88968500 -0.07161300  
H -2.17724900 -7.07987900 -0.44072400  
H -1.48812100 -8.66504000 -0.84367800  
H -1.98378000 -8.33912000 0.82233800  
C 0.71423200 -3.92883300 -4.68376700  
H 0.20789500 -2.96008000 -4.65172200  
H 1.29293900 -4.00923800 -5.60755300  
H -0.03361600 -4.71944400 -4.64227800  
H 3.44978100 -6.14904000 0.72855500  
H 4.01116500 -4.52732200 -0.50632900  
F -0.29468800 -3.78617400 -0.55091500  
F -1.03525200 -6.35645300 -3.25648400  
N 3.48609700 -8.92563200 -4.83002900  
S 3.75527500 -8.64954600 -3.17345400  
S 3.62306400 -7.57470400 -5.89639400  
C 2.96453800 -10.06486100 -2.43562800  
O 5.21529500 -8.79247600 -3.00060900  
O 3.11539500 -7.42704100 -2.66463900  
C 5.23881100 -6.91085200 -5.54590700  
O 3.63990200 -8.19468800 -7.22880000  
O 2.61191700 -6.55285800 -5.59368000  
C 3.34367200 -11.35407000 -2.81913600  
C 2.07106600 -9.83699700 -1.38919100  
C 6.35082600 -7.44505200 -6.20151000  
C 5.34458600 -5.88508800 -4.60380800  
C 2.80595000 -12.43874000 -2.12920300  
H 4.03912200 -11.50233500 -3.63755700  
C 1.55313400 -10.93280400 -0.69781100

H 1.79607000 -8.82427100 -1.12859400  
C 7.60815100 -6.92220900 -5.90380300  
H 6.22592000 -8.23846900 -6.92961300  
C 6.60873300 -5.37459000 -4.31890600  
H 4.45848500 -5.50979200 -4.10888400  
C 1.91946300 -12.22825900 -1.06679200  
H 3.08230100 -13.44797600 -2.41674700  
H 0.86109100 -10.76841600 0.12181600  
C 7.73569000 -5.89284800 -4.96490100  
H 8.48693600 -7.31582600 -6.40418100  
H 6.71326900 -4.57381700 -3.59383400  
H 1.51208200 -13.07892600 -0.52921400  
H 8.71879800 -5.49262900 -4.73683000  
C 0.97835600 -9.48854300 -5.60130200  
C 0.34714800 -8.63175100 -4.67528000  
C -0.34609300 -9.17308700 -3.59781800  
C -0.40123800 -10.56051800 -3.43041500  
C 0.24477300 -11.41786900 -4.34002200  
C 0.92795000 -10.88525900 -5.42341100  
H 1.42802700 -9.08617100 -6.50068900  
H 0.40333300 -7.55651000 -4.78627200  
H -0.83702400 -8.49221300 -2.91457300  
H -0.93359400 -10.98305800 -2.58378100  
H 0.20666400 -12.49185300 -4.18939700  
H 1.42348200 -11.53532000 -6.13734400

**DTSN-N-4F (Benzene, Quintet)**

E(BS1) = -5402.650907  
E(BS2) = -5406.104445  
ZPE = 0.96038  
H = 1.035519  
G = 0.849224  
<S<sup>2</sup>> = 6.0385  
335.0240i  
N -0.15049700 -0.91988600 -1.22832200  
S 0.91022000 -0.86430400 0.03705700  
S 0.24472100 -0.25108200 -2.67900900  
C 1.13900100 0.88073300 0.40851900  
O 2.24371700 -1.42335800 -0.25824400  
O 0.18218500 -1.43004900 1.18986900  
C -0.19788300 1.48918600 -2.55289000  
O -0.70097400 -0.82657700 -3.65828900  
O 1.68532700 -0.30061900 -3.00560900  
C 0.02615300 1.63020600 0.80195300  
C 2.40492700 1.45424100 0.30938700  
C -1.55086500 1.82363200 -2.47421100  
C 0.79391900 2.46703900 -2.52408500  
C 0.19096100 2.98145500 1.09497800  
H -0.94946500 1.16019500 0.86586400  
C 2.56053500 2.80963600 0.61194400  
H 3.24317900 0.84295800 -0.00484600  
C -1.91552200 3.16244600 -2.35056000  
H -2.29955700 1.04530100 -2.52396800  
C 0.41985400 3.80657700 -2.39787500  
H 1.83542800 2.17636300 -2.58592800  
C 1.45702800 3.57066000 1.00103000  
H -0.66662500 3.57785900 1.39078700  
H 3.54161400 3.26891000 0.53785600  
C -0.92961700 4.15442300 -2.30884800  
H -2.96622800 3.43072200 -2.29022800  
H 1.18504600 4.57570000 -2.36231600

|    |             |             |             |                                   |              |              |             |
|----|-------------|-------------|-------------|-----------------------------------|--------------|--------------|-------------|
| H  | 1.57987800  | 4.62541800  | 1.22828300  | S                                 | 3.68995800   | -8.62196400  | -3.25016500 |
| H  | -1.21452100 | 5.19756500  | -2.20851200 | S                                 | 3.54831500   | -7.47514600  | -5.93174500 |
| Cu | -1.79746200 | -2.68764000 | -1.14481100 | C                                 | 2.98023400   | -10.05554200 | -2.46368000 |
| C  | -4.68336800 | -0.20825300 | -3.25606000 | O                                 | 5.15447500   | -8.77192000  | -3.19305500 |
| C  | -5.01840000 | 0.68152800  | -2.24366100 | O                                 | 3.09094700   | -7.41566500  | -2.65459500 |
| C  | -4.51914000 | 0.47164600  | -0.96000100 | C                                 | 5.22488800   | -6.97936200  | -5.58542800 |
| C  | -3.67764000 | -0.61759700 | -0.73744100 | O                                 | 3.49519900   | -8.05941300  | -7.28325200 |
| C  | -3.82650300 | -1.28631200 | -2.98695800 | O                                 | 2.65281100   | -6.34837500  | -5.62097900 |
| C  | -3.20891700 | -1.00604600 | 0.61444000  | C                                 | 3.50267200   | -11.32096500 | -2.74560200 |
| C  | -3.47777100 | -0.26761900 | 1.76474700  | C                                 | 2.00304300   | -9.85772600  | -1.49070100 |
| C  | -3.13659200 | -0.81709200 | 3.00108400  | C                                 | 6.27585200   | -7.68624600  | -6.17177800 |
| H  | -3.33774300 | -0.26629300 | 3.91420600  | C                                 | 5.43402000   | -5.89492300  | -4.73326100 |
| C  | -2.56817900 | -2.08204600 | 3.05167800  | C                                 | 3.00515500   | -12.41803200 | -2.04586100 |
| C  | -2.27324200 | -2.76301200 | 1.86111900  | H                                 | 4.27760600   | -11.43943000 | -3.49456100 |
| H  | -5.07880700 | -0.08662600 | -4.25772300 | C                                 | 1.52210900   | -10.96412000 | -0.78924200 |
| H  | -5.67486100 | 1.52210100  | -2.44325000 | H                                 | 1.63085600   | -8.86094300  | -1.29812500 |
| H  | -2.33011300 | -2.54903700 | 4.00072700  | C                                 | 7.58084600   | -7.28883000  | -5.88633900 |
| N  | -3.32087700 | -1.45194400 | -1.74687400 | H                                 | 6.07239600   | -8.51836800  | -6.83624400 |
| N  | -2.57398500 | -2.19885400 | 0.67829500  | C                                 | 6.74541400   | -5.51028300  | -4.45858300 |
| C  | -1.61978000 | -4.11109500 | 1.87468400  | H                                 | 4.58943900   | -5.37894900  | -4.29467300 |
| H  | -0.54162000 | -3.97571500 | 1.76295100  | C                                 | 2.01734900   | -12.23905800 | -1.07039000 |
| H  | -1.82833600 | -4.62294600 | 2.81737000  | H                                 | 3.39075100   | -13.41039900 | -2.25596800 |
| H  | -1.95236000 | -4.70600100 | 1.02231000  | H                                 | 0.76097300   | -10.82501100 | -0.02819200 |
| C  | -3.47094600 | -2.27408000 | -4.05435400 | C                                 | 7.81371600   | -6.20699600  | -5.03027900 |
| H  | -2.42281400 | -2.14610600 | -4.32752700 | H                                 | 8.41520800   | -7.82114100  | -6.33168100 |
| H  | -3.57096300 | -3.29302600 | -3.67741300 | H                                 | 6.93088600   | -4.66887000  | -3.79838500 |
| H  | -4.10738300 | -2.13378100 | -4.93003200 | H                                 | 1.63796300   | -13.09779700 | -0.52506600 |
| H  | -3.95596700 | 0.70175000  | 1.71029500  | H                                 | 8.83330800   | -5.90470200  | -4.81128500 |
| H  | -4.79963200 | 1.13262500  | -0.15078800 | C                                 | 1.42589500   | -9.28735800  | -5.29449000 |
| F  | -2.44091200 | -5.19975000 | -1.06912400 | C                                 | 0.52261700   | -8.50661400  | -4.46880700 |
| F  | -1.37288400 | -3.59609500 | -2.81245100 | C                                 | -0.35682900  | -9.13494700  | -3.61824900 |
| Cu | -0.71231500 | -5.16820400 | -1.88470900 | C                                 | -0.40457500  | -10.54324400 | -3.54089800 |
| C  | 2.84623400  | -3.41068100 | -3.50501900 | C                                 | 0.45949200   | -11.33084000 | -4.33292100 |
| C  | 3.69384400  | -3.58286900 | -2.42117500 | C                                 | 1.35313400   | -10.73509800 | -5.19099800 |
| C  | 3.32058800  | -4.43384800 | -1.38028500 | H                                 | 1.56680200   | -8.92819200  | -6.31238600 |
| C  | 2.07393400  | -5.04287900 | -1.43879700 | H                                 | 0.53954700   | -7.42658400  | -4.53018600 |
| C  | 1.59409600  | -4.04750500 | -3.51909900 | H                                 | -1.02141600  | -8.51143300  | -3.03298100 |
| C  | 1.58339700  | -6.02472200 | -0.44866500 | H                                 | -1.10261200  | -11.02538400 | -2.86426600 |
| C  | 2.38633300  | -6.55717200 | 0.55912200  | H                                 | 0.41301300   | -12.41300100 | -4.26636900 |
| C  | 1.85121500  | -7.52285100 | 1.40712300  | H                                 | 2.01026500   | -11.32557200 | -5.81972500 |
| H  | 2.45833700  | -7.94687400 | 2.20001900  |                                   |              |              |             |
| C  | 0.54330900  | -7.95380800 | 1.21543600  |                                   |              |              |             |
| C  | -0.22626500 | -7.40335200 | 0.18143700  | <b>D7-N-4F (Benzene, Quintet)</b> |              |              |             |
| H  | 3.12142600  | -2.77764000 | -4.33996600 | E(BS1) =                          | -5402.658819 |              |             |
| H  | 4.65102700  | -3.07326500 | -2.38751400 | E(BS2) =                          | -5406.111765 |              |             |
| H  | 0.10570000  | -8.71642400 | 1.84938400  | ZPE =                             | 0.961036     |              |             |
| N  | 1.23939300  | -4.80371500 | -2.47407300 | H =                               | 1.036400     |              |             |
| N  | 0.30576900  | -6.44905300 | -0.60463800 | G =                               | 0.848570     |              |             |
| C  | -1.61704400 | -7.88835800 | -0.10238300 | <S <sup>2</sup> > =               | 6.0477       |              |             |
| H  | -2.24110800 | -7.05940700 | -0.43923900 | N                                 | -0.14884100  | -0.93049700  | -1.24019500 |
| H  | -1.58156300 | -8.64113800 | -0.89769400 | S                                 | 0.91984400   | -0.89494500  | 0.01924000  |
| H  | -2.04778900 | -8.35723800 | 0.78478800  | S                                 | 0.24008900   | -0.24488100  | -2.68472000 |
| C  | 0.65585700  | -3.90549600 | -4.67941400 | C                                 | 1.15643500   | 0.84439300   | 0.41171900  |
| H  | 0.16672300  | -2.92841700 | -4.63586700 | O                                 | 2.25012200   | -1.45352400  | -0.29159100 |
| H  | 1.22490600  | -3.99159900 | -5.60836700 | O                                 | 0.19789400   | -1.47406300  | 1.16915200  |
| H  | -0.10594200 | -4.68253500 | -4.63567300 | C                                 | -0.19438600  | 1.49554700   | -2.53424400 |
| H  | 3.41380800  | -6.23751700 | 0.67009100  | O                                 | -0.71341000  | -0.80491900  | -3.66543600 |
| H  | 3.98588000  | -4.60296000 | -0.54407800 | O                                 | 1.67857600   | -0.29501400  | -3.02060000 |
| F  | -0.31659800 | -3.78014100 | -0.54142500 | C                                 | 0.04805300   | 1.59272500   | 0.81957700  |
| F  | -1.11512300 | -6.32623800 | -3.25597000 | C                                 | 2.42389600   | 1.41471500   | 0.31391300  |
| N  | 3.23031800  | -8.82010700 | -4.89429600 | C                                 | -1.54515900  | 1.83525800   | -2.44234400 |
|    |             |             |             | C                                 | 0.80205200   | 2.46856100   | -2.50004600 |

|    |             |             |             |   |             |              |             |
|----|-------------|-------------|-------------|---|-------------|--------------|-------------|
| C  | 0.21886300  | 2.93966000  | 1.12853900  | N | 0.25372900  | -6.46133200  | -0.69125700 |
| H  | -0.92883900 | 1.12521800  | 0.88167300  | C | -1.66792800 | -7.90736700  | -0.21750000 |
| C  | 2.58561300  | 2.76567700  | 0.63258900  | H | -2.29998200 | -7.07442500  | -0.52929200 |
| H  | 3.25860700  | 0.80447500  | -0.01153100 | H | -1.61367800 | -8.62568400  | -1.04306800 |
| C  | -1.90290100 | 3.17411100  | -2.30004800 | H | -2.09826400 | -8.41530900  | 0.64791400  |
| H  | -2.29770800 | 1.06104800  | -2.49678200 | C | 0.60610500  | -3.88761800  | -4.74066900 |
| C  | 0.43500600  | 3.80811000  | -2.35492300 | H | 0.10738600  | -2.91672900  | -4.67454700 |
| H  | 1.84177600  | 2.17399500  | -2.57233300 | H | 1.17186300  | -3.94823600  | -5.67344400 |
| C  | 1.48656000  | 3.52560500  | 1.03619000  | H | -0.14735700 | -4.67351300  | -4.70901300 |
| H  | -0.63533900 | 3.53530400  | 1.43542700  | H | 3.34451400  | -6.23449700  | 0.62160500  |
| H  | 3.56794600  | 3.22247200  | 0.55971200  | H | 3.94046600  | -4.62772000  | -0.61677500 |
| C  | -0.91222200 | 4.16102800  | -2.25274200 | F | -0.34424600 | -3.79492500  | -0.60118100 |
| H  | -2.95195700 | 3.44633900  | -2.22954600 | F | -1.16542100 | -6.30989900  | -3.34081400 |
| H  | 1.20398100  | 4.57324400  | -2.31508100 | N | 3.14756300  | -8.78402700  | -4.88441300 |
| H  | 1.61415500  | 4.57704200  | 1.27587500  | S | 3.77261300  | -8.63704900  | -3.24998100 |
| H  | -1.19156900 | 5.20415500  | -2.13774700 | S | 3.47564300  | -7.42509200  | -5.95537800 |
| Cu | -1.81469700 | -2.68261500 | -1.17597300 | C | 3.05707900  | -10.01379700 | -2.37518100 |
| C  | -4.70182500 | -0.14408300 | -3.20957800 | O | 5.21675800  | -8.87678600  | -3.35673200 |
| C  | -5.01784800 | 0.73071500  | -2.17803900 | O | 3.29789700  | -7.38514000  | -2.64203700 |
| C  | -4.50553800 | 0.49479700  | -0.90407300 | C | 5.16306200  | -6.98415600  | -5.61911900 |
| C  | -3.67092500 | -0.60513600 | -0.70992000 | O | 3.38408100  | -8.01320400  | -7.29951600 |
| C  | -3.85016300 | -1.23289900 | -2.96923800 | O | 2.60409900  | -6.29208700  | -5.61456200 |
| C  | -3.19127500 | -1.02191300 | 0.62975000  | C | 3.66641200  | -11.26815400 | -2.48479900 |
| C  | -3.43942600 | -0.30133700 | 1.79584200  | C | 1.98341900  | -9.77810600  | -1.51834000 |
| C  | -3.08975800 | -0.87606500 | 3.01826600  | C | 6.18645700  | -7.71669300  | -6.22311400 |
| H  | -3.27464500 | -0.33945700 | 3.94319600  | C | 5.40899300  | -5.90691600  | -4.76740700 |
| C  | -2.53400700 | -2.14743400 | 3.04007300  | C | 3.15089700  | -12.32271200 | -1.73665200 |
| C  | -2.26007400 | -2.81047000 | 1.83438900  | H | 4.51940900  | -11.40628400 | -3.13907000 |
| H  | -5.10784400 | -0.00210900 | -4.20429100 | C | 1.48249600  | -10.84421300 | -0.77253200 |
| H  | -5.66970700 | 1.57980100  | -2.35547100 | H | 1.55088200  | -8.78986500  | -1.45271800 |
| H  | -2.29020200 | -2.63358900 | 3.97798700  | C | 7.50409800  | -7.35500100  | -5.95164400 |
| N  | -3.33182900 | -1.42397500 | -1.73805800 | H | 5.95269600  | -8.54216400  | -6.88564500 |
| N  | -2.56848800 | -2.22226100 | 0.66535100  | C | 6.73354100  | -5.55926700  | -4.50743100 |
| C  | -1.62337700 | -4.16676700 | 1.81705300  | H | 4.58437000  | -5.37089000  | -4.31568700 |
| H  | -0.54460000 | -4.04488400 | 1.69599000  | C | 2.05816200  | -12.11133300 | -0.88764200 |
| H  | -1.82897400 | -4.69257900 | 2.75268400  | H | 3.60225600  | -13.30666300 | -1.81094600 |
| H  | -1.97297100 | -4.74191800 | 0.95795800  | H | 0.64492900  | -10.68051200 | -0.10275200 |
| C  | -3.51309700 | -2.20473600 | -4.05692500 | C | 7.77512100  | -6.28278200  | -5.09446200 |
| H  | -2.46420700 | -2.08706700 | -4.33156300 | H | 8.31874800  | -7.90766700  | -6.40817300 |
| H  | -3.62693400 | -3.22918800 | -3.69896400 | H | 6.94927400  | -4.72553800  | -3.84693400 |
| H  | -4.15076200 | -2.03880300 | -4.92717600 | H | 1.66105200  | -12.93806000 | -0.30670200 |
| H  | -3.90812900 | 0.67368800  | 1.76423400  | H | 8.80495300  | -6.00874100  | -4.88677300 |
| H  | -4.77096300 | 1.14409600  | -0.08045200 | C | 1.70293000  | -9.25852400  | -5.09707100 |
| F  | -2.48297300 | -5.20037400 | -1.13259200 | C | 0.66358500  | -8.49559400  | -4.32994600 |
| F  | -1.41671800 | -3.57773500 | -2.86092400 | C | -0.37067400 | -9.14063500  | -3.70972800 |
| Cu | -0.76097600 | -5.16698900 | -1.95855000 | C | -0.46324100 | -10.55465600 | -3.69151900 |
| C  | 2.80307900  | -3.41202800 | -3.56878700 | C | 0.55027000  | -11.33260100 | -4.30576300 |
| C  | 3.65160900  | -3.59586900 | -2.48757100 | C | 1.60592800  | -10.74768600 | -4.94805800 |
| C  | 3.27490000  | -4.45030300 | -1.45089900 | H | 1.57561600  | -9.03997400  | -6.17167700 |
| C  | 2.02567300  | -5.05362600 | -1.51164400 | H | 0.71321100  | -7.41472600  | -4.32660400 |
| C  | 1.54864500  | -4.04406100 | -3.58599800 | H | -1.11649000 | -8.52492400  | -3.21979600 |
| C  | 1.52830300  | -6.03292900 | -0.52239100 | H | -1.28688200 | -11.04148000 | -3.18003700 |
| C  | 2.31900600  | -6.55635600 | 0.49981800  | H | 0.49849000  | -12.41636900 | -4.24933200 |
| C  | 1.77276200  | -7.51398700 | 1.34983700  | H | 2.38732900  | -11.33742600 | -5.41559900 |
| H  | 2.36912500  | -7.92907000 | 2.15551900  |   |             |              |             |
| C  | 0.46870200  | -7.95027700 | 1.14359700  |   |             |              |             |
| C  | -0.28676700 | -7.41254000 | 0.09291200  |   |             |              |             |
| H  | 3.07984100  | -2.77448200 | -4.39981500 |   |             |              |             |
| H  | 4.61145400  | -3.09139000 | -2.45195000 |   |             |              |             |
| H  | 0.02478900  | -8.70921400 | 1.77755100  |   |             |              |             |
| N  | 1.19226600  | -4.80708900 | -2.54646300 |   |             |              |             |

**3-radical cation (Doublet)**

E(BS1) = -1091.19617148

E(BS2) = -1091.35961414

ZPE = 0.242044

H = 0.256958

G = 0.200006

$\langle S^2 \rangle = 0.7625$

|   |             |             |             |   |             |            |             |
|---|-------------|-------------|-------------|---|-------------|------------|-------------|
| C | -5.72139000 | -2.24911000 | 0.16675600  | H | -1.24733900 | 3.84951200 | 0.00018200  |
| C | -4.33392100 | -2.29745700 | 0.12494200  | C | 1.29738400  | 6.02617100 | 0.00000100  |
| C | -3.56249100 | -1.11873900 | -0.01176600 | H | -0.83818900 | 6.45097400 | 0.00012400  |
| C | -4.26594100 | 0.13801000  | -0.01210400 | H | 1.73457000  | 7.01624600 | -0.00003100 |
| C | -5.68215500 | 0.15751300  | 0.03607800  |   |             |            |             |
| C | -6.40318900 | -1.02173500 | 0.10756100  |   |             |            |             |
| C | -2.12554200 | -1.12712600 | -0.07360000 |   |             |            |             |
| C | -3.54183900 | 1.34165100  | -0.00467600 |   |             |            |             |
| C | -2.13795200 | 1.36088000  | -0.03391900 |   |             |            |             |
| C | -1.40983400 | 0.12064300  | -0.10877600 |   |             |            |             |
| C | -0.00669900 | 0.19595200  | -0.28263100 |   |             |            |             |
| H | 0.56528400  | -0.70844200 | -0.44041100 |   |             |            |             |
| C | 0.65250300  | 1.41885200  | -0.28452500 |   |             |            |             |
| C | -0.05932000 | 2.62298100  | -0.15035400 |   |             |            |             |
| C | -1.43938800 | 2.59376800  | -0.04361200 |   |             |            |             |
| H | -6.28158000 | -3.17304700 | 0.26166900  |   |             |            |             |
| H | -3.84473700 | -3.25689500 | 0.22178100  |   |             |            |             |
| H | -6.19286100 | 1.11520400  | 0.02801500  |   |             |            |             |
| H | -7.48674700 | -0.99848300 | 0.14267600  |   |             |            |             |
| H | -4.08312000 | 2.28283100  | 0.02399100  |   |             |            |             |
| H | 1.72978200  | 1.44075800  | -0.40889700 |   |             |            |             |
| H | 0.46779600  | 3.57060700  | -0.15698600 |   |             |            |             |
| H | -2.00584800 | 3.51722900  | 0.02192600  |   |             |            |             |
| C | -1.37284100 | -2.37247800 | -0.09186500 |   |             |            |             |
| C | -0.30750300 | -2.71540100 | 0.72958200  |   |             |            |             |
| S | -1.67691100 | -3.66106300 | -1.25452000 |   |             |            |             |
| C | 0.24028600  | -3.98771800 | 0.44402300  |   |             |            |             |
| H | 0.03186400  | -2.07517300 | 1.53463600  |   |             |            |             |
| C | -0.38364700 | -4.60558100 | -0.61434900 |   |             |            |             |
| H | 1.06347900  | -4.42953200 | 0.99131700  |   |             |            |             |
| H | -0.14657100 | -5.56186100 | -1.06111500 |   |             |            |             |

#### 4-radical cation (Doublet)

E(BS1) = -1028.78374087

E(BS2) = -1028.94663092

ZPE = 0.187015

H = 0.200352

G = 0.146006

$\langle S^2 \rangle = 0.7646$

|   |             |             |             |  |  |  |  |
|---|-------------|-------------|-------------|--|--|--|--|
| C | 0.34436300  | 0.15872800  | 0.00002000  |  |  |  |  |
| C | 1.76026700  | 0.16922800  | 0.00012000  |  |  |  |  |
| C | 1.06703800  | 2.19447800  | 0.00007000  |  |  |  |  |
| O | -0.08632600 | 1.42085100  | -0.00001500 |  |  |  |  |
| H | -0.40254400 | -0.62047800 | -0.00003100 |  |  |  |  |
| N | 2.16600300  | 1.46939400  | 0.00015200  |  |  |  |  |
| C | 2.66068200  | -0.95713800 | 0.00018000  |  |  |  |  |
| C | 4.05646800  | -0.73175200 | 0.00022300  |  |  |  |  |
| C | 2.16720700  | -2.28311900 | 0.00019400  |  |  |  |  |
| C | 4.93132800  | -1.80701300 | 0.00027700  |  |  |  |  |
| H | 4.42695500  | 0.28672200  | 0.00021200  |  |  |  |  |
| C | 3.05166600  | -3.35187100 | 0.00024600  |  |  |  |  |
| H | 1.09992000  | -2.47452700 | 0.00016600  |  |  |  |  |
| C | 4.43273300  | -3.11789800 | 0.00028800  |  |  |  |  |
| H | 6.00198200  | -1.63370500 | 0.00031100  |  |  |  |  |
| H | 2.67178400  | -4.36759600 | 0.00025500  |  |  |  |  |
| H | 5.12119200  | -3.95679100 | 0.00033000  |  |  |  |  |
| C | 0.92192400  | 3.59420200  | 0.00005700  |  |  |  |  |
| C | -0.27390400 | 4.32326100  | 0.00011800  |  |  |  |  |
| S | 2.32371000  | 4.64759300  | -0.00004700 |  |  |  |  |
| C | -0.05324000 | 5.70599100  | 0.00008500  |  |  |  |  |
